# Supplementary material for: Integrating network pharmacology, molecular docking, and molecular dynamics simulations to explore potential compounds and mechanisms of Coptis chinensis in treating streptococcal infections
Source: PeerJ journal article supplement (doi:10.7717/peerj.19960), 2025-09-26
Supplement: Table_S1.xlsx [file Table_S1.xlsx]

## Sheet: Sheet1
	Target
	ALOX5
	KCNH2
	CYP3A4
	DPP4
	VEGFA
	BCL2
	BCL2L1
	FOS
	PLAU
	MAPK1
	IL10
	EGF
	JUN
	IL6
	CASP3
	TP53
	NFKBIA
	ODC1
	SOD1
	PRKCA
	MMP1
	HIF1A
	STAT1
	ERBB2
	HMOX1
	CAV1
	F3
	ICAM1
	IL1B
	CCL2
	SELE
	VCAM1
	CXCL8
	NOS3
	HSPB1
	TGFB1
	MGAM
	IL2
	PLAT
	THBD
	AKR1B1
	COL1A1
	IFNG
	AKT1
	IL1A
	HAS2
	GSTP1
	CXCL11
	CXCL2
	PPARA
	CRP
	CXCL10
	CHUK
	SPP1
	CTSD
	ERBB3
	IL23A
	SH2D2A
	RELA
	IL4
	IL2RA
	MIF
	CA6
	EDNRB
	EDNRA
	MAOA
	PTK2
	TYK2
	TLR9
	FLT4
	PDE4B
	FYN
	ACE
	ACE2
	ADAM17
	ADAMTS5
	CASP1
	CASP6
	RAC1
	NOS2
	IRAK4
	XDH
	ROCK1
	MCL1
	MAPK10
	PIK3CB
	C5AR1
	CFD
	PTGS1
	PTGS2
	CTSG
	MMP12
	ELANE
	PTGES
	CDC42
	CD40LG
	BTK
	PTPRC
	PTGER2
	MDM2
	APP
	ALK
	ITGAL
	SERPINE1
	EGFR
	UBA1
	CEBPB
	ALB
	PRF1
	HPGD
	PIM2
	PIK3R1
	PIK3CA
	PIK3CG
	SCD
	TYMS
	DHFR
	SRC
	IKBKB
	MAPK14
	MMP9
	MAP2K1
	P2RX7
	MMP2
	CD38
	MMP3
	MAPK8
	PAK4
	EPHX2
	ECE1
	EGLN1
	GZMB
	HMGCR
	ITGB1
	MME
	MMP13
	MMP16
	MMP8
	TKT
	TNF
	CTSB
	CXCR2
	FASN
	PARP1
	PLA2G2A
	ILK
	PLA2G7
	KCNMA1
	STAT3
	ANPEP
	PNP
	STAT6
	PRKD1
	IDO1
	SIRT1
	PSMB8
	INSR
	MYLK
	PPP1CA
	GCK
	F2
	ITK
	MAPK3
	TBK1
	FTO
	HSP90B1
	LDHB
	FPR2
	GLO1
	MPO
	CXCR1
	AKR1A1
	APEX1
	TTR
	CCR4
	RIPK3
	TLR4
	WLS
	CALCA
	INS
