# Supplementary material for: Integrating network pharmacology, molecular docking, and molecular dynamics simulations to explore potential compounds and mechanisms of Coptis chinensis in treating streptococcal infections
Source: PeerJ journal article supplement (doi:10.7717/peerj.19960), 2025-09-26
Supplement: Table_S2.xlsx [file Table_S2.xlsx]

## Sheet: Sheet1
Target	Degree	Betweenness	Closeness
IL1B	82	2057.78	0.645914
IL6	82	2274.49	0.648438
STAT3	70	1914.67	0.612546
SRC	63	843.641	0.592857
IFNG	60	1072.28	0.584507
TLR4	58	1511.15	0.574394
AKT1	57	1860.8	0.584507
CXCL8	56	846.921	0.582456
INS	56	737.16	0.576389
NFKBIA	52	409.676	0.566553
PTGS2	51	618.8	0.557047
CCL2	50	831.984	0.555184
MMP9	49	760.292	0.551495
BCL2	49	543.947	0.558922
TNF	48	2210.76	0.562712
TP53	46	1276.7	0.555184
EGF	45	449.365	0.555184
IL2	45	399.192	0.533762
JUN	44	585.654	0.549669
IL4	43	363.634	0.551495
MMP1	43	165.392	0.538961
BCL2L1	41	195.261	0.532051
RELA	40	372.975	0.533762
EGFR	39	1102.76	0.546053
MAPK1	39	269.225	0.544262
ICAM1	38	452.25	0.535484
CAV1	38	177.803	0.520376
CASP3	37	480.43	0.526984
ALB	36	422.315	0.517134
CEBPB	34	128.805	0.507645
ACE	34	68.3183	0.513932
STAT1	31	564.604	0.504559
TGFB1	31	423.425	0.488235
MMP2	31	187.83	0.513932
HIF1A	30	375.062	0.482558
PIK3CA	30	254.55	0.498499
CDC42	29	197.172	0.509203
SERPINE1	29	192.04	0.497006
PRKCA	29	125.255	0.48538
TLR9	28	150.531	0.470255
IL10	27	949.652	0.507645
CXCL10	27	300.728	0.482558
APP	27	202.463	0.507645
CD40LG	27	83.5673	0.488235
CRP	25	199.828	0.477011
IKBKB	25	133.262	0.483965
TYK2	25	126.136	0.482558
CHUK	24	96.1305	0.483965
PTK2	23	146.372	0.5
MPO	22	130.653	0.467606
F2	22	33.9029	0.482558
VCAM1	21	254.037	0.488235
MAPK8	21	234.686	0.468927
PLAU	21	71.7836	0.459834
CXCL11	21	66.613	0.447439
ITK	21	31.9087	0.466292
NOS3	20	66.2055	0.440318
IL2RA	20	57.8501	0.453552
PPARA	19	64.4269	0.48538
TBK1	19	30.2208	0.464986
SPP1	18	119.659	0.456044
CASP1	17	149.291	0.464986
SIRT1	17	143.215	0.440318
F3	17	75.0518	0.472934
NOS2	17	53.4208	0.453552
PLAT	17	42.0107	0.470255
IDO1	17	39.0143	0.461111
HSP90B1	17	11.5452	0.470255
PIK3CB	16	138.717	0.454795
PARP1	16	71.4363	0.448649
MDM2	16	45.6292	0.458564
PIK3CG	16	32.9828	0.449865
INSR	16	28.5253	0.4573
CXCR1	16	17.9553	0.449865
ERBB2	15	272.321	0.464986
CTSB	15	24.6709	0.437995
STAT6	14	174.644	0.468927
FLT4	14	28.4816	0.434555
CXCL2	13	135.811	0.44504
HMOX1	13	86.6493	0.436842
CTSD	13	11.7971	0.435696
CASP6	13	11.375	0.422392
GSTP1	13	7.70391	0.453552
PAK4	13	2.4789	0.424552
ACE2	12	85.0916	0.447439
BTK	12	31.5032	0.436842
HSPB1	12	22.6689	0.43342
MAPK3	11	411.493	0.430052
FYN	11	137.77	0.435696
DPP4	11	42.8114	0.437995
CCR4	11	2.45357	0.408867
IRAK4	10	27.7816	0.413965
ILK	10	23.7803	0.402913
EDNRB	10	3.17522	0.431169
DUSP16	10	2.88496	0.424552
FOS	9	364.988	0.424552
CXCR2	9	75.6864	0.415
ERBB3	9	29.7948	0.409877
PRF1	9	18.9543	0.403893
ELANE	9	18.7899	0.401937
THBD	9	18.7736	0.4
MME	9	17.1668	0.418136
IL23A	9	16.6072	0.399038
PTGES	9	8.1785	0.428941
TTR	9	4.86346	0.405868
GZMB	8	40.0541	0.412935
ANPEP	8	20.2335	0.404878
ADAM17	8	9.85817	0.389671
FASN	8	3.42434	0.415
MAOA	8	2.63429	0.410891
ALOX5	8	0	0.410891
ITGAL	7	38.0608	0.400966
ALK	7	17.5134	0.386047
ROCK1	7	12.7961	0.388759
PNP	7	6.7931	0.413965
RIPK3	7	6.4684	0.422392
EDNRA	7	0.440237	0.420253
MAP2K1	6	39.8439	0.410891
MMP12	6	14.1546	0.386946
HMGCR	6	9.76375	0.398082
PLA2G2A	6	5.37398	0.427835
ITGB1	5	340.602	0.395238
PIK3R1	5	335.93	0.36971
SELE	5	60.0248	0.390588
CD38	5	55.8796	0.403893
RAC1	5	23.4009	0.377273
MMP13	5	20.9047	0.420253
COL18A1	5	16.133	0.380734
PRKD1	5	9.54981	0.378995
MIF	5	6.72279	0.396181
CTSG	5	6.66104	0.413965
APEX1	5	6.24818	0.386047
ECE1	5	0.171795	0.397129
IL1A	4	484.066	0.367257
MAPK14	4	356.193	0.364835
PTPRC	4	340.549	0.342268
COL1A1	4	27.8897	0.333333
GCK	4	1.25	0.350211
PLA2G7	4	0.138528	0.364835
PPP1CA	4	0	0.376417
MGAM	4	0	0.367257
TYMS	4	0	0.367257
MMP3	3	174.184	0.373874
MCL1	3	54.3678	0.343685
PTGS1	3	11.0593	0.367257
XDH	3	4.34207	0.379863
SCD	3	4.04098	0.30855
CYP3A4	3	1.46736	0.38785
MMP8	3	0.653061	0.38785
DHFR	3	0	0.400966
FPR2	3	0	0.364835
AKR1B1	3	0	0.360087
SOD1	2	6.25	0.286207
SH2D2A	2	0.770039	0.385151
C5AR1	2	0.203557	0.348739
ADAMTS5	2	0	0.378995
PTGER2	2	0	0.373874
PSMB8	2	0	0.371365
P2RX7	2	0	0.367257
UBA1	2	0	0.359307
EGLN1	1	0	0.36971
MMP16	1	0	0.298561
HPGD	1	0	0.283761
GLO1	1	0	0.270358
TKT	1	0	0.269044
EPHX2	1	0	0.267742
KCNH2	1	0	0.255385
