# Supplementary material for: Integrating network pharmacology, molecular docking, and molecular dynamics simulations to explore potential compounds and mechanisms of Coptis chinensis in treating streptococcal infections
Source: PeerJ journal article supplement (doi:10.7717/peerj.19960), 2025-09-26
Supplement: Table_S3.xlsx [file Table_S3.xlsx]

## Sheet: GO
Category	Term	Count	%	PValue	Genes	List Total	Pop Hits	Pop Total	Fold Enrichment	Bonferroni	Benjamini	FDR
MF	protein binding	157	87.2222	2.76925e-10	APP, SERPINE1, PRF1, PLAT, MPO, TNF, MYLK, ICAM1, EDNRA, EDNRB, TBK1, PNP, PLAU, AKT1, PIM2, WLS, KCNH2, MAP2K1, PRKCA, MIF, ACE2, ADAM17, IL23A, BTK, PRKD1, TP53, PTGES, CALCA, MAOA, SH2D2A, GLO1, FPR2, PIK3R1, HIF1A, HSP90B1, DPP4, LDHB, HMOX1, ELANE, MCL1, MGAM, JUN, TGFB1, INSR, CAV1, SELE, PTK2, IL2, NFKBIA, IL4, COL1A1, CXCL10, CXCL11, IL6, PTPRC, FASN, ALB, BCL2, MDM2, UBA1, BCL2L1, ITGB1,…	180	12657	18967	1.30706	1.62555e-07	2.30668e-08	2.09092e-08
CC	plasma membrane	93	51.6667	8.35862e-13	ITGB1, ALK, APP, ITK, FLT4, SERPINE1, PRF1, ILK, HSPB1, ECE1, PIK3CB, ITGAL, TNF, PIK3CG, MYLK, ICAM1, THBD, EDNRA, EDNRB, PLAU, ANPEP, CASP1, CD38, AKT1, CTSG, RAC1, CCR4, WLS, KCNH2, MAP2K1, MME, MMP2, PRKCA, TYK2, MIF, IRAK4, F2, F3, ACE2, IL1A, ADAM17, PIK3CA, MMP16, KCNMA1, BTK, TLR9, PRKD1, TLR4, FTO, ROCK1, SRC, GLO1, PTGER2, C5AR1, PIK3R1, FPR2, EGFR, HSP90B1, DPP4, CDC42, MAPK8, ERBB3, C…	180	5455	20647	1.95557	2.76679e-10	5.5334e-11	4.64739e-11
CC	cytosol	91	50.5556	4.48477e-11	APP, ITK, FLT4, PRF1, ILK, AKR1B1, HSPB1, PIK3CB, PIK3CG, MYLK, IKBKB, TBK1, PNP, CASP6, CASP3, PDE4B, CASP1, AKT1, CA6, CTSG, RAC1, WLS, MAP2K1, PARP1, RIPK3, CHUK, AKR1A1, PRKCA, TYK2, FOS, MIF, IRAK4, SIRT1, IL1A, ADAM17, PIK3CA, IL1B, BTK, PRKD1, TKT, TP53, IDO1, FTO, HPGD, ROCK1, MAOA, SRC, GSTP1, GLO1, SH2D2A, ODC1, PIK3R1, TYMS, HIF1A, RELA, HSP90B1, CDC42, LDHB, MAPK8, ALOX5, ERBB2, HMOX1…	180	5627	20647	1.85502	1.48446e-08	1.85557e-09	1.55846e-09
CC	cytoplasm	91	50.5556	1.91603e-10	ITGB1, APP, HSPB1, PLAT, PIK3CB, PIK3CG, MYLK, IKBKB, TBK1, PNP, CASP6, ANPEP, CASP3, CASP1, AKT1, CTSG, PIM2, RAC1, RIPK3, MME, CHUK, MMP3, PRKCA, TYK2, MIF, IRAK4, SIRT1, MMP12, ACE2, ADAM17, PIK3CA, BTK, TLR9, PRKD1, TLR4, TP53, IDO1, FTO, CEBPB, CALCA, HPGD, ROCK1, SRC, GSTP1, GLO1, SH2D2A, ODC1, PIK3R1, FPR2, TYMS, CYP3A4, PTGS2, PLA2G7, HIF1A, EGFR, RELA, PTGS1, CDC42, LDHB, MAPK8, ALOX5, M…	180	5771	20647	1.80873	6.34207e-08	7.04675e-09	5.91842e-09
CC	nucleus	71	39.4444	0.00373901	APP, ITK, HSPB1, PIK3CB, MPO, IKBKB, PNP, CASP6, CASP3, PDE4B, CD38, AKT1, CTSG, RAC1, MAP2K1, PARP1, RIPK3, CHUK, MMP2, MMP3, PRKCA, TYK2, FOS, IRAK4, SIRT1, MMP12, IL1A, BTK, PRKD1, PPARA, TP53, FTO, CEBPB, CALCA, GSTP1, PIK3R1, TYMS, HIF1A, EGFR, RELA, HSP90B1, MAPK8, ERBB2, HMOX1, MAPK1, FYN, STAT6, MCL1, MAPK3, EGLN1, JUN, TGFB1, NOS2, NOS3, STAT1, STAT3, GZMB, MAPK14, PSMB8, GCK, PTK2, SOD1…	180	6100	20647	1.3351	0.710596	0.0287817	0.0241731
CC	extracellular space	67	37.2222	4.45086e-23	APP, CXCL8, SERPINE1, AKR1B1, HSPB1, PLAT, MPO, TNF, CXCL2, ICAM1, THBD, ADAMTS5, PLAU, ANPEP, CASP1, CA6, CTSG, CTSD, CTSB, IL10, MMP1, MMP2, MMP3, AKR1A1, MIF, IRAK4, MMP8, F2, MMP9, F3, MMP12, ACE2, IL1A, MMP13, IFNG, MMP16, IL1B, CFD, CRP, CALCA, GSTP1, EGFR, INS, TTR, ERBB3, ALOX5, SPP1, CCL2, HMOX1, XDH, ELANE, TGFB1, ACE, VCAM1, EGF, PLA2G2A, SELE, IL2, SOD1, VEGFA, IL4, COL1A1, CXCL10, CX…	180	1990	20647	3.86195	1.47323e-20	1.47323e-20	1.23734e-20
CC	extracellular region	63	35	6.47575e-18	APP, CXCL8, FLT4, SERPINE1, PRF1, PLAT, MPO, TNF, CXCL2, ADAMTS5, PNP, PLAU, CA6, CTSG, CTSD, CTSB, IL10, MMP1, MMP2, MMP3, MIF, MMP8, F2, MMP9, MMP12, ACE2, IL1A, MMP13, IFNG, MMP16, IL23A, IL1B, TLR9, CFD, CRP, CALCA, ROCK1, GSTP1, PLA2G7, HSP90B1, INS, DPP4, TTR, ALOX5, SPP1, CCL2, MAPK1, ELANE, TGFB1, ACE, EGF, PLA2G2A, GZMB, MAPK14, IL2, SOD1, VEGFA, IL4, COL1A1, CXCL10, CXCL11, IL6, ALB	180	2208	20647	3.27285	2.14347e-15	1.07174e-15	9.00129e-16
MF	identical protein binding	61	33.8889	7.14659e-20	ALK, APP, PRF1, HSPB1, TNF, PIK3CG, IKBKB, ADAMTS5, TBK1, PNP, CASP6, CASP1, CD38, AKT1, WLS, KCNH2, PARP1, RIPK3, FOS, MIF, MMP9, SIRT1, ACE2, KCNMA1, BTK, PRKD1, TLR4, TP53, CRP, CALCA, HPGD, EGFR, RELA, INS, DPP4, CDC42, LDHB, TTR, ERBB3, ERBB2, HMOX1, MAPK1, HAS2, FYN, STAT6, MAPK3, JUN, TGFB1, STAT1, INSR, CAV1, STAT3, SOD1, VEGFA, P2RX7, NFKBIA, COL1A1, ALB, BCL2, MDM2, BCL2L1	180	1736	18967	3.7026	4.19505e-17	4.20219e-17	3.80913e-17
CC	extracellular exosome	57	31.6667	8.80559e-14	ITGB1, ALK, APP, SERPINE1, AKR1B1, HSPB1, PLAT, ECE1, ITGAL, MPO, ICAM1, PNP, PLAU, ANPEP, CD38, CA6, CTSG, RAC1, CTSD, WLS, CTSB, MME, AKR1A1, PRKCA, TYK2, MIF, F2, MMP9, ACE2, TKT, CFD, HPGD, SRC, GSTP1, GLO1, HSP90B1, PTGS1, DPP4, CDC42, LDHB, TTR, SPP1, ELANE, MGAM, ACE, VCAM1, EGF, EPHX2, INSR, PLA2G2A, PSMB8, SOD1, PPP1CA, PTPRC, FASN, ALB, UBA1	180	2240	20647	2.91885	2.91415e-11	7.28662e-12	6.11988e-12
CC	membrane	51	28.3333	0.000522946	ITGB1, APP, PRF1, ILK, ECE1, PIK3CB, ITGAL, TNF, PIK3CG, ICAM1, CD38, AKT1, CTSG, RAC1, PARP1, MME, PRKCA, TYK2, FOS, F3, ACE2, ADAM17, PIK3CA, KCNMA1, PRKD1, PTGES, PIK3R1, FPR2, CYP3A4, EGFR, HSP90B1, DPP4, CDC42, LDHB, ERBB2, CXCR2, HMOX1, MCL1, MGAM, ACE, VCAM1, INSR, CAV1, GZMB, VEGFA, P2RX7, PTPRC, CD40LG, SCD, FASN, BCL2	180	3677	20647	1.59097	0.15898	0.00692381	0.00581516
CC	nucleoplasm	49	27.2222	0.0129975	FLT4, ILK, AKR1B1, PIK3CB, MPO, TBK1, CASP6, CASP3, AKT1, PARP1, CHUK, PRKCA, FOS, MIF, SIRT1, TKT, PPARA, TP53, FTO, CEBPB, HPGD, SRC, GLO1, HIF1A, RELA, MAPK8, ALOX5, ERBB2, CXCR2, HMOX1, MAPK1, STAT6, MCL1, MAPK3, JUN, NOS2, STAT1, STAT3, MAPK14, PSMB8, GCK, SOD1, PPP1CA, NFKBIA, MAPK10, APEX1, BCL2, MDM2, UBA1	180	4076	20647	1.37894	0.986837	0.0768245	0.0645233
BP	inflammatory response	45	25	2.88838e-33	CRP, CEBPB, CALCA, CXCL8, PTGER2, C5AR1, FPR2, ITGAL, PTGS2, TNF, CXCL2, RELA, PIK3CG, PTGS1, IKBKB, TBK1, CXCR2, SPP1, CCL2, AKT1, RAC1, CCR4, TGFB1, VCAM1, NOS2, CHUK, PLA2G2A, STAT3, FOS, MIF, SELE, P2RX7, IL1A, CXCL10, CXCL11, IL6, CD40LG, IL23A, FASN, IL1B, IL2RA, TLR9, PRKD1, TLR4, IDO1	180	436	19453	11.1542	8.26365e-30	8.26076e-30	7.16607e-30
BP	signal transduction	44	24.4444	1.27945e-13	ALK, ITK, CXCL8, ROCK1, SRC, SH2D2A, C5AR1, PIK3CB, PIK3R1, ITGAL, HIF1A, EGFR, MAPK8, EDNRA, TTR, ERBB3, PLAU, ANPEP, ERBB2, CXCR2, CASP1, PDE4B, SPP1, CCL2, AKT1, MAPK1, CD38, STAT6, RAC1, PAK4, IL10, MAP2K1, RIPK3, STAT1, STAT3, IRAK4, MAPK14, MAPK10, CXCL10, CXCL11, IL23A, IL1B, PRKD1, PTGES	180	1307	19453	3.63824	3.65915e-10	2.0329e-11	1.7635e-11
BP	positive regulation of transcription from RNA polymerase II promoter	39	21.6667	3.11743e-11	APP, CEBPB, PIK3R1, HIF1A, TNF, RELA, EGFR, IKBKB, TBK1, AKT1, STAT6, MAPK3, IL10, EGLN1, JUN, TGFB1, PARP1, CHUK, STAT1, STAT3, FOS, MAPK14, SIRT1, IL2, VEGFA, MMP12, IL4, NFKBIA, IL1A, CXCL10, IL6, IL23A, APEX1, IL1B, TLR9, PRKD1, PPARA, TP53, TLR4	180	1232	19453	3.42112	8.91896e-08	2.47663e-09	2.14843e-09
BP	negative regulation of apoptotic process	38	21.1111	5.32689e-22	SRC, GSTP1, FLT4, GLO1, AKR1B1, HSPB1, PIK3R1, MPO, TNF, RELA, EGFR, HSP90B1, IKBKB, MAPK8, EDNRB, ERBB3, CASP3, ERBB2, AKT1, CD38, PIM2, MCL1, IL10, AKR1A1, MIF, MMP9, SIRT1, IL2, PTK2, VEGFA, IL4, IL6, CD40LG, ALB, BCL2, MDM2, TP53, BCL2L1	180	540	19453	7.60508	1.52402e-18	5.0783e-19	4.40534e-19
MF	ATP binding	38	21.1111	9.89199e-08	ALK, ITK, ROCK1, SRC, FLT4, ILK, PIK3CB, EGFR, PIK3CG, HSP90B1, MYLK, IKBKB, MAPK8, TBK1, ERBB3, ERBB2, AKT1, MAPK1, FYN, PIM2, MAPK3, PAK4, MAP2K1, RIPK3, CHUK, INSR, PRKCA, TYK2, IRAK4, MAPK14, GCK, PTK2, MAPK10, P2RX7, PIK3CA, BTK, UBA1, PRKD1	180	1539	18967	2.60178	5.80643e-05	3.42146e-06	3.10143e-06
BP	positive regulation of gene expression	37	20.5556	1.37391e-21	CRP, APP, CXCL8, ROCK1, PIK3CB, HIF1A, TNF, RELA, INS, MAPK8, ERBB3, ERBB2, AKT1, MAPK1, MAPK3, MAP2K1, TGFB1, EGF, NOS3, EPHX2, CAV1, STAT3, MAPK14, MMP8, F3, VEGFA, P2RX7, IL4, IL1A, IL6, IFNG, IL1B, TLR9, MDM2, PRKD1, TP53, TLR4	180	519	19453	7.70457	3.93075e-18	9.82344e-19	8.52166e-19
BP	protein phosphorylation	33	18.3333	9.97108e-20	APP, ITK, CALCA, ROCK1, SRC, ILK, PIK3R1, MYLK, IKBKB, CDC42, MAPK8, EDNRA, TBK1, ERBB2, CCL2, AKT1, MAPK1, FYN, CTSG, PIM2, MAPK3, PAK4, MAP2K1, TGFB1, CHUK, INSR, PRKCA, TYK2, PTK2, MAPK10, P2RX7, BTK, PRKD1	180	444	19453	8.03239	2.85273e-16	5.70346e-17	4.94765e-17
BP	positive regulation of cell proliferation	33	18.3333	3.97845e-17	ITGB1, FLT4, ODC1, ILK, RELA, EGFR, INS, DPP4, EDNRB, ERBB3, ERBB2, CXCR2, AKT1, HAS2, RAC1, TGFB1, EGF, INSR, MIF, F2, SIRT1, IL2, PTK2, VEGFA, IL4, CXCL10, ADAM17, IL6, IFNG, IL1B, BCL2, MDM2, BCL2L1	180	545	19453	6.54382	1.13823e-13	1.4223e-14	1.23382e-14
BP	positive regulation of transcription, DNA-templated	30	16.6667	2.64134e-11	CEBPB, SRC, ILK, HIF1A, TNF, RELA, EGFR, IKBKB, SPP1, AKT1, CD38, PIM2, IL10, KCNH2, JUN, MAP2K1, TGFB1, RIPK3, CHUK, EGF, STAT1, INSR, STAT3, FOS, IL4, COL1A1, IL6, IL1B, PPARA, TP53	180	728	19453	4.45353	7.55688e-08	2.15835e-09	1.87233e-09
MF	protein serine/threonine/tyrosine kinase activity	30	16.6667	1.62412e-16	ALK, ITK, ROCK1, SRC, FLT4, ILK, EGFR, PIK3CG, IKBKB, MAPK8, TBK1, ERBB3, ERBB2, AKT1, MAPK1, FYN, PIM2, MAPK3, PAK4, MAP2K1, RIPK3, INSR, PRKCA, TYK2, IRAK4, MAPK14, PTK2, PIK3CA, BTK, PRKD1	180	444	18967	7.11974	6.51701e-14	4.7749e-14	4.32827e-14
CC	cell surface	29	16.1111	3.13689e-12	ITGB1, APP, PLAT, ITGAL, TNF, EGFR, ICAM1, DPP4, THBD, PLAU, CXCR2, CD38, CTSG, ELANE, KCNH2, TGFB1, VCAM1, MME, MIF, IRAK4, F3, VEGFA, ACE2, IL1A, ADAM17, PTPRC, CD40LG, MMP16, TLR4	180	657	20647	5.06311	1.03833e-09	1.73052e-10	1.45343e-10
CC	integral component of plasma membrane	29	16.1111	5.53576e-05	ALK, APP, FLT4, PTGER2, C5AR1, TNF, EGFR, ICAM1, THBD, EDNRA, EDNRB, ERBB3, ERBB2, CXCR2, HAS2, CCR4, KCNH2, VCAM1, MME, CAV1, INSR, SELE, F3, P2RX7, ADAM17, PTPRC, CD40LG, MMP16, TLR4	180	1453	20647	2.28937	0.018157	0.000872541	0.000732829
CC	mitochondrion	29	16.1111	6.46302e-05	APP, MAOA, SRC, GSTP1, TYMS, LDHB, MAPK8, AKT1, MAPK1, FYN, MCL1, MAPK3, MAP2K1, PARP1, MMP2, GZMB, PRKCA, MAPK14, SIRT1, GCK, SOD1, MAPK10, P2RX7, DHFR, APEX1, BCL2, UBA1, TP53, BCL2L1	180	1466	20647	2.26907	0.0211661	0.000972391	0.000816691
BP	cellular response to lipopolysaccharide	28	15.5556	5.19376e-24	CEBPB, CXCL8, SRC, GSTP1, SERPINE1, TNF, CXCL2, RELA, MAPK8, EDNRB, CASP1, PDE4B, CCL2, CTSG, IL10, NOS2, MMP3, IRAK4, MAPK14, MMP8, MMP9, IL1A, CXCL10, CXCL11, IL6, IL1B, TLR9, TLR4	180	198	19453	15.2829	1.48594e-20	7.42708e-21	6.44286e-21
CC	perinuclear region of cytoplasm	28	15.5556	3.99158e-10	ITGB1, APP, SRC, ECE1, PIK3R1, EGFR, HSP90B1, ALOX5, ERBB2, PDE4B, SPP1, HMOX1, FYN, CTSB, KCNH2, NOS2, STAT1, CAV1, PLA2G2A, PRKCA, SELE, PTK2, PIK3CA, APEX1, BTK, PRKD1, TLR4, PTGES	180	754	20647	4.25962	1.32121e-07	1.32121e-08	1.10966e-08
MF	protein homodimerization activity	28	15.5556	2.1323e-09	APP, CEBPB, FLT4, ODC1, HSPB1, ECE1, TYMS, PTGS2, RELA, DPP4, IKBKB, AKT1, HMOX1, XDH, MCL1, KCNH2, PARP1, MME, NOS2, CHUK, STAT1, EPHX2, STAT3, VEGFA, BCL2, TLR9, TKT, BCL2L1	180	749	18967	3.93915	1.25166e-06	1.04483e-07	9.47098e-08
BP	proteolysis	27	15	1.15226e-13	CFD, PLAT, DPP4, THBD, ADAMTS5, CASP6, PLAU, CASP3, ANPEP, CASP1, CTSG, CTSD, ELANE, CTSB, ACE, MME, MMP1, MMP2, MMP3, MMP8, F2, MMP9, F3, MMP12, ADAM17, MMP13, MMP16	180	458	19453	6.37107	3.29705e-10	1.93851e-11	1.68162e-11
BP	apoptotic process	26	14.4444	5.40265e-10	APP, ROCK1, PRF1, CASP6, CASP3, CASP1, MAPK1, PIM2, MCL1, MAPK3, PAK4, PARP1, GZMB, MAPK14, MMP9, SOD1, NFKBIA, IL1A, IFNG, IL1B, IL2RA, BCL2, MDM2, PRKD1, TP53, BCL2L1	180	619	19453	4.53938	1.5457e-06	3.51172e-08	3.04636e-08
BP	response to xenobiotic stimulus	25	13.8889	8.5775e-17	SRC, TYMS, PTGS2, TNF, RELA, PNP, CASP3, HMOX1, CD38, IL10, JUN, TGFB1, ACE, CHUK, STAT1, MMP2, FOS, SOD1, P2RX7, COL1A1, ADAM17, APEX1, BCL2, MDM2, TP53	180	277	19453	9.75381	3.17635e-13	2.72574e-14	2.36453e-14
BP	positive regulation of apoptotic process	25	13.8889	7.35169e-15	ITGB1, APP, HPGD, SRC, PTGS2, TNF, MAPK8, CASP6, CASP3, HMOX1, CTSD, MCL1, JUN, TGFB1, ACE, MMP2, MMP9, SIRT1, SOD1, IL6, KCNMA1, BCL2, TP53, BCL2L1, IDO1	180	336	19453	8.04109	2.09639e-11	1.40172e-12	1.21597e-12
MF	enzyme binding	25	13.8889	2.64107e-13	APP, SRC, CYP3A4, PTGS2, HIF1A, RELA, EGFR, HSP90B1, MAPK8, AKT1, HMOX1, FYN, RAC1, EGLN1, JUN, TGFB1, PARP1, STAT1, CAV1, PRKCA, MAPK14, SIRT1, NFKBIA, MDM2, TP53	180	386	18967	6.82463	1.5504e-10	3.88237e-11	3.51922e-11
BP	positive regulation of cell migration	24	13.3333	4.43921e-16	ITGB1, TGFB1, EGF, FLT4, CAV1, MMP2, INSR, STAT3, PRKCA, PIK3R1, F3, MMP9, EGFR, PTK2, INS, MYLK, VEGFA, CDC42, IL4, COL1A1, ADAM17, PLAU, IL1B, HAS2	180	267	19453	9.71436	1.27054e-12	1.15419e-13	1.00124e-13
MF	protein kinase activity	24	13.3333	1.6762e-12	MAP2K1, ROCK1, RIPK3, CHUK, SRC, FLT4, ILK, PRKCA, TYK2, MAPK14, EGFR, PIK3CG, PTK2, MYLK, MAPK10, IKBKB, MAPK8, TBK1, ERBB3, ERBB2, CCL2, AKT1, PIM2, PAK4	180	382	18967	6.62024	9.83938e-10	1.97121e-10	1.78683e-10
CC	external side of plasma membrane	24	13.3333	3.79028e-11	ITGB1, ACE, VCAM1, INSR, ECE1, ITGAL, F2, SELE, F3, TNF, ICAM1, P2RX7, CXCL10, THBD, PTPRC, CD40LG, CXCR1, PLAU, ANPEP, IL2RA, CXCR2, CCR4, TLR4, CTSB	180	484	20647	5.68788	1.25458e-08	1.79226e-09	1.50528e-09
BP	immune response	23	12.7778	1.92549e-09	IL10, CEBPB, CXCL8, CHUK, C5AR1, TYK2, PIK3R1, TNF, IL2, PIK3CG, IL4, IL1A, PNP, CD40LG, IFNG, CXCR1, IL1B, IL2RA, CXCR2, CCL2, CTSG, CCR4, TLR4	180	510	19453	4.87385	5.50882e-06	1.07979e-07	9.36696e-08
MF	zinc ion binding	23	12.7778	3.41604e-05	ACE, PARP1, MME, MMP1, GLO1, MMP2, MMP3, ECE1, PRKCA, MMP8, MMP9, SOD1, MMP12, ACE2, ADAMTS5, MMP13, MMP16, ANPEP, ALB, MDM2, CA6, PPARA, TP53	180	888	18967	2.72924	0.0198528	0.000803453	0.0007283
BP	response to hypoxia	22	12.2222	1.1798e-17	EGLN1, TGFB1, ACE, VCAM1, NOS2, CAV1, MMP2, PLAT, HIF1A, TNF, HSP90B1, VEGFA, DPP4, IL1A, ADAM17, EDNRA, PLAU, CASP3, KCNMA1, CD38, HMOX1, PPARA	180	176	19453	13.509	3.37541e-14	4.82033e-15	4.18155e-15
BP	positive regulation of protein phosphorylation	22	12.2222	2.09079e-15	APP, TGFB1, FLT4, INSR, ILK, FPR2, F2, SIRT1, TNF, MMP9, EGFR, PTK2, VEGFA, P2RX7, ADAM17, EDNRB, IFNG, IL1B, ERBB2, AKT1, RAC1, MAPK3	180	226	19453	10.5203	6.03506e-12	4.59974e-13	3.99019e-13
BP	angiogenesis	22	12.2222	2.41068e-14	JUN, CXCL8, NOS3, EGF, FLT4, SH2D2A, CAV1, MMP2, SERPINE1, PRKCA, PTGS2, MAPK14, HIF1A, SIRT1, PIK3CG, PTK2, VEGFA, PIK3CA, ANPEP, CCL2, HMOX1, PRKD1	180	255	19453	9.32388	6.89268e-11	4.3091e-12	3.73807e-12
BP	intracellular signal transduction	22	12.2222	1.82758e-09	ITK, CXCL8, ROCK1, SRC, HSPB1, PRKCA, TYK2, IRAK4, MAPK14, RELA, MAPK10, MAPK8, ERBB2, BTK, AKT1, HMOX1, MAPK1, FYN, PRKD1, RAC1, PAK4, MAPK3	180	462	19453	5.1463	5.22869e-06	1.04537e-07	9.06844e-08
CC	macromolecular complex	22	12.2222	7.31332e-07	ALK, APP, PARP1, RIPK3, STAT1, CAV1, PIK3R1, PTGS2, HIF1A, TNF, EGFR, HSP90B1, SOD1, CDC42, TTR, CASP6, ALB, MDM2, CASP1, BCL2, AKT1, TP53	180	697	20647	3.62055	0.000242042	1.61381e-05	1.3554e-05
CC	membrane raft	21	11.6667	5.60291e-14	ITGB1, APP, MME, SRC, CAV1, SELE, TNF, EGFR, ICAM1, DPP4, IKBKB, ACE2, LDHB, ADAM17, EDNRB, PTPRC, CASP3, BTK, FYN, STAT6, CTSD	180	249	20647	9.67396	1.85579e-11	6.18187e-12	5.19203e-12
BP	response to lipopolysaccharide	21	11.6667	6.90242e-18	CEBPB, ACE, VCAM1, NOS2, HPGD, CHUK, NOS3, PTGER2, FOS, PTGS2, SELE, MPO, P2RX7, THBD, ADAM17, IL1B, CASP3, BTK, TLR4, ELANE, IDO1	180	149	19453	15.2317	1.97478e-14	3.29015e-15	2.85415e-15
BP	negative regulation of transcription from RNA polymerase II promoter	21	11.6667	0.00111177	APP, JUN, CEBPB, TGFB1, PARP1, STAT1, CAV1, STAT3, SIRT1, TNF, RELA, VEGFA, MMP12, IL4, EDNRB, IFNG, MDM2, STAT6, PPARA, TP53, ELANE	180	1016	19453	2.23378	0.958519	0.0109643	0.00951135
BP	regulation of cell proliferation	20	11.1111	2.8368e-15	ALK, JUN, TGFB1, NOS2, STAT1, PTGER2, FLT4, STAT3, SIRT1, EGFR, PTK2, PTGS1, NFKBIA, ACE2, CXCL10, CXCL11, ERBB3, PLAU, ERBB2, STAT6	180	175	19453	12.3511	8.2585e-12	5.79517e-13	5.02721e-13
BP	positive regulation of ERK1 and ERK2 cascade	20	11.1111	4.18642e-13	APP, MAP2K1, JUN, TGFB1, SRC, FLT4, PLA2G2A, C5AR1, PRKCA, FPR2, MIF, TNF, EGFR, ICAM1, VEGFA, IL1A, PTPRC, CCL2, TLR4, MAPK3	180	230	19453	9.39758	1.1978e-09	5.44234e-11	4.72114e-11
BP	negative regulation of gene expression	20	11.1111	1.28624e-10	APP, TGFB1, ACE, CXCL8, NOS2, SRC, STAT3, MIF, MMP8, HIF1A, SIRT1, TNF, INS, VEGFA, TBK1, IFNG, PIK3CA, AKT1, FYN, XDH	180	319	19453	6.77569	3.67993e-07	9.43241e-09	8.18245e-09
BP	innate immune response	20	11.1111	6.45457e-06	CRP, APP, CALCA, PARP1, CHUK, SRC, MMP3, MIF, IRAK4, PIK3CG, RELA, PTK2, IKBKB, TBK1, IL23A, BTK, TLR9, FYN, PRKD1, TLR4	180	634	19453	3.40922	0.0182971	0.000140917	0.000122243
CC	focal adhesion	20	11.1111	8.11169e-09	ITGB1, MAP2K1, MME, SRC, CAV1, HSPB1, ILK, EGFR, PTK2, HSP90B1, ICAM1, CDC42, DPP4, ADAM17, PTPRC, PLAU, MAPK1, RAC1, PAK4, MAPK3	180	434	20647	5.28597	2.68497e-06	2.44088e-07	2.05004e-07
MF	protein serine/threonine kinase activity	20	11.1111	8.35308e-09	MAP2K1, ROCK1, RIPK3, CHUK, ILK, PRKCA, IRAK4, MAPK14, PIK3CG, MAPK10, IKBKB, MAPK8, TBK1, PIK3CA, AKT1, MAPK1, PIM2, PRKD1, PAK4, MAPK3	180	400	18967	5.26861	4.90324e-06	3.77816e-07	3.42476e-07
CC	endoplasmic reticulum	20	11.1111	0.00662651	APP, MAP2K1, VCAM1, CAV1, PLA2G2A, PRKCA, FOS, HMGCR, PTGS2, HSP90B1, VEGFA, SCD, APEX1, ALB, BCL2, TLR9, HMOX1, TP53, WLS, BCL2L1	180	1175	20647	1.95243	0.889271	0.0438675	0.0368434
BP	cell surface receptor signaling pathway	19	10.5556	1.57725e-09	FPR2, MIF, F2, MAPK14, TNF, EGFR, P2RX7, CXCL10, EDNRB, PTPRC, CD40LG, IFNG, CXCR1, IL2RA, ERBB2, CXCR2, CCL2, MAPK1, MAPK3	180	329	19453	6.24125	4.51251e-06	9.20601e-08	7.98605e-08
CC	Golgi apparatus	19	10.5556	0.0106345	APP, MAP2K1, VCAM1, NOS3, CAV1, PTGS1, VEGFA, COL1A1, CD40LG, FASN, ALB, SPP1, MAPK1, HAS2, PRKD1, TLR4, WLS, PAK4, MAPK3	180	1144	20647	1.90507	0.970953	0.0664152	0.0557807
BP	positive regulation of angiogenesis	18	10	2.2843e-13	ITGB1, CXCL8, NOS3, STAT3, C5AR1, SERPINE1, HSPB1, PRKCA, F3, HIF1A, SIRT1, VEGFA, IL1A, IL1B, CXCR2, HMOX1, PRKD1, PAK4	180	166	19453	11.7187	6.53692e-10	3.26655e-11	2.83367e-11
BP	positive regulation of MAPK cascade	18	10	4.10682e-13	ALK, APP, MAP2K1, ROCK1, EGF, FLT4, INSR, MMP8, TNF, INS, SOD1, VEGFA, P2RX7, CDC42, IL6, PTPRC, ERBB2, TLR9	180	172	19453	11.3099	1.17493e-09	5.44234e-11	4.72114e-11
CC	endoplasmic reticulum membrane	18	10	0.0195004	CAV1, PLA2G2A, HMGCR, CYP3A4, PTGS2, EGFR, PTGS1, HSP90B1, CDC42, SCD, BCL2, TLR9, HMOX1, HAS2, RAC1, TKT, PTGES, WLS	180	1132	20647	1.82394	0.998524	0.105814	0.0888709
BP	positive regulation of NF-kappaB transcription factor activity	17	9.44444	2.53212e-12	ALK, APP, TGFB1, RIPK3, CHUK, CAV1, STAT3, TNF, RELA, INS, IKBKB, CD40LG, IL1B, BTK, TLR9, PRKD1, TLR4	180	164	19453	11.2026	7.2443e-09	2.68217e-10	2.32674e-10
BP	positive regulation of protein kinase B signaling	17	9.44444	1.60799e-11	ITGB1, APP, TGFB1, SRC, EGF, INSR, PIK3CB, F3, SIRT1, TNF, EGFR, PIK3CG, PTK2, INS, VEGFA, PIK3CA, ERBB3	180	185	19453	9.93096	4.60046e-08	1.39359e-09	1.20892e-09
BP	positive regulation of I-kappaB kinase/NF-kappaB signaling	17	9.44444	7.55463e-11	PARP1, CHUK, IRAK4, TNF, RELA, IKBKB, IL1A, TBK1, IL1B, CASP1, TLR9, HMOX1, FYN, PIM2, PRKD1, TLR4, WLS	180	205	19453	8.96209	2.16138e-07	5.83952e-09	5.06568e-09
BP	G-protein coupled receptor signaling pathway	17	9.44444	0.0167909	APP, CXCL8, PTGER2, INSR, ECE1, PIK3CB, FPR2, F2, PIK3CG, INS, CXCL10, EDNRA, CXCR1, CCL2, AKT1, RAC1, CCR4	180	966	19453	1.90189	1	0.0982044	0.0851906
MF	endopeptidase activity	16	8.88889	7.12927e-16	ACE, MME, MMP1, MMP2, MMP3, ECE1, MMP8, MMP9, PSMB8, MMP12, ACE2, ADAMTS5, ADAM17, MMP13, CASP1, ELANE	180	79	18967	21.3412	3.91021e-13	1.39734e-13	1.26663e-13
BP	positive regulation of MAP kinase activity	16	8.88889	3.2918e-16	APP, TGFB1, SRC, EGF, INSR, MIF, TNF, EGFR, PIK3CG, VEGFA, P2RX7, PTPRC, IL1B, ERBB2, TLR4, ELANE	180	77	19453	22.4566	9.52904e-13	9.41454e-14	8.16695e-14
BP	positive regulation of inflammatory response	16	8.88889	1.49833e-13	APP, CEBPB, TGFB1, ACE, PLA2G2A, SERPINE1, PLA2G7, TNF, IL2, NFKBIA, IFNG, IL23A, IL1B, CASP1, TLR9, TLR4	180	114	19453	15.168	4.28807e-10	2.25538e-11	1.9565e-11
BP	cellular response to tumor necrosis factor	16	8.88889	3.19688e-12	CALCA, VCAM1, CXCL8, CHUK, FOS, MAPK14, SIRT1, RELA, NFKBIA, COL1A1, IKBKB, CCL2, AKT1, MAPK1, HAS2, MAPK3	180	140	19453	12.3511	9.14629e-09	3.15278e-10	2.73498e-10
BP	cell adhesion	16	8.88889	0.000243857	ITGB1, APP, VCAM1, SRC, PRKCA, FPR2, ITGAL, SELE, IL2, ICAM1, DPP4, COL1A1, ADAM17, SPP1, CCL2, RAC1	180	566	19453	3.05505	0.502301	0.0031558	0.0027376
MF	serine-type endopeptidase activity	16	8.88889	2.91541e-10	CFD, MMP1, MMP2, MMP3, GZMB, PLAT, F2, MMP8, F3, MMP9, MMP12, DPP4, MMP13, PLAU, CTSG, ELANE	180	187	18967	9.01581	1.71134e-07	2.30668e-08	2.09092e-08
MF	receptor binding	16	8.88889	8.91765e-06	APP, CALCA, SRC, CAV1, STAT3, SERPINE1, PLAT, F2, PTK2, P2RX7, DPP4, CXCL10, PTPRC, CCL2, FYN, TLR4	180	412	18967	4.09213	0.00522101	0.000238344	0.00021605
MF	protein kinase binding	16	8.88889	0.000130591	PARP1, CAV1, STAT3, HSPB1, ILK, IRAK4, HIF1A, RELA, PTK2, CDC42, IKBKB, PTPRC, AKT1, RAC1, TP53, BCL2L1	180	521	18967	3.236	0.0737969	0.00255958	0.00232016
BP	I-kappaB kinase/NF-kappaB signaling	15	8.33333	5.81035e-16	ROCK1, RIPK3, CHUK, TNF, RELA, NFKBIA, IKBKB, EDNRA, EDNRB, TBK1, IL1B, BTK, TLR9, AKT1, FYN	180	64	19453	25.3294	1.58817e-12	1.3848e-13	1.20129e-13
BP	positive regulation of interleukin-6 production	15	8.33333	8.27356e-13	APP, TGFB1, NOS2, STAT3, MMP8, TNF, RELA, P2RX7, IL1A, IL6, IFNG, IL1B, BTK, TLR9, TLR4	180	105	19453	15.4389	2.36701e-09	9.85932e-11	8.55279e-11
BP	positive regulation of tumor necrosis factor production	15	8.33333	1.23042e-12	APP, TGFB1, STAT3, HSPB1, PIK3R1, MIF, MMP8, IL1A, IL6, PTPRC, IFNG, IL23A, BTK, TLR9, TLR4	180	108	19453	15.01	3.52035e-09	1.4076e-10	1.22107e-10
BP	chemotaxis	15	8.33333	9.4205e-12	MAP2K1, CXCL8, C5AR1, PIK3CB, FPR2, MAPK14, CXCL2, CXCL10, CXCL11, CXCR1, PLAU, CXCR2, CCL2, MAPK1, CCR4	180	125	19453	12.9687	2.69519e-08	8.69118e-10	7.53944e-10
BP	negative regulation of cell proliferation	15	8.33333	9.95723e-05	IL10, APP, MAP2K1, JUN, TGFB1, CXCL8, NOS3, STAT3, PTGS2, IL1A, IL6, IL1B, PIM2, TP53, PTGES	180	462	19453	3.50884	0.247903	0.00147553	0.00127999
CC	endoplasmic reticulum lumen	15	8.33333	5.87884e-07	APP, F2, PTGS2, INS, HSP90B1, COL1A1, ACE2, ADAMTS5, IL6, ADAM17, IL23A, ALB, SPP1, MAPK1, MAPK3	180	311	20647	5.53242	0.000194571	1.38993e-05	1.16737e-05
MF	protein heterodimerization activity	15	8.33333	1.61828e-05	ITGB1, APP, CEBPB, CHUK, CAV1, PIK3R1, HIF1A, IKBKB, ERBB3, ERBB2, BCL2, TP53, TLR4, MCL1, BCL2L1	180	381	18967	4.14851	0.00945442	0.000396479	0.000359394
BP	positive regulation of peptidyl-serine phosphorylation	14	7.77778	2.99084e-12	APP, TGFB1, CAV1, MIF, PTGS2, TNF, EGFR, VEGFA, IL6, TBK1, PIK3CA, BCL2, AKT1, PRKD1	180	93	19453	16.2689	8.55676e-09	3.05493e-10	2.6501e-10
BP	aging	14	7.77778	1.04405e-09	IL10, CALCA, TGFB1, ACE, VCAM1, MME, MMP2, FOS, TYMS, PTGS2, MPO, SOD1, EDNRB, APEX1	180	147	19453	10.2926	2.98703e-06	6.35317e-08	5.51127e-08
BP	cytokine-mediated signaling pathway	14	7.77778	2.96522e-09	STAT1, CAV1, STAT3, TYK2, IRAK4, F3, RELA, IL1A, IL6, IL1B, CCL2, AKT1, CTSG, STAT6	180	160	19453	9.45632	8.48345e-06	1.6001e-07	1.38806e-07
BP	extracellular matrix organization	14	7.77778	2.36168e-08	ITGB1, APP, MMP1, MMP2, MMP3, ITGAL, MMP8, TNF, MMP9, MMP12, COL1A1, ADAMTS5, MMP13, MMP16	180	190	19453	7.96322	6.75653e-05	1.03914e-06	9.01434e-07
BP	negative regulation of transcription, DNA-templated	14	7.77778	0.00331611	JUN, CALCA, TGFB1, PARP1, SRC, SIRT1, TNF, RELA, IL4, IFNG, APEX1, MDM2, CD38, TP53	180	591	19453	2.56009	0.999925	0.0266407	0.0231103
BP	cell differentiation	14	7.77778	0.0164783	SRC, SH2D2A, CAV1, STAT3, TYK2, EGFR, PTK2, VEGFA, ANPEP, AKT1, FYN, PRKD1, PPARA, MCL1	180	723	19453	2.09268	1	0.0965738	0.0837761
MF	cytokine activity	14	7.77778	3.58347e-08	IL10, TGFB1, MIF, TNF, IL2, VEGFA, IL4, IL1A, IL6, CD40LG, IFNG, IL23A, IL1B, SPP1	180	192	18967	7.68339	2.10347e-05	1.40472e-06	1.27333e-06
MF	kinase activity	14	7.77778	3.25562e-07	ALK, PRKCA, PIK3CB, PIK3R1, IRAK4, EGFR, PIK3CG, MYLK, PIK3CA, PLAU, ERBB2, BTK, AKT1, PRKD1	180	232	18967	6.35867	0.000191087	1.0635e-05	9.64025e-06
MF	macromolecular complex binding	14	7.77778	5.18283e-05	ITGB1, CALCA, TGFB1, RIPK3, CHUK, CAV1, INSR, FOS, ITGAL, TTR, CASP3, APEX1, RAC1, PPARA	180	370	18967	3.98706	0.0299658	0.0011287	0.00102313
MF	peptidase activity	13	7.22222	3.13834e-10	APP, ACE, MMP1, MMP3, MMP8, MMP9, ADAMTS5, ADAM17, CASP3, CTSG, CTSD, ELANE, CTSB	180	105	18967	13.0461	1.84221e-07	2.30668e-08	2.09092e-08
MF	metalloendopeptidase activity	13	7.22222	6.70811e-10	ACE, MME, MMP1, MMP2, MMP3, ECE1, MMP8, MMP9, MMP12, ADAMTS5, ADAM17, MMP13, MMP16	180	112	18967	12.2307	3.93766e-07	4.38263e-08	3.97269e-08
MF	protein tyrosine kinase activity	13	7.22222	8.25223e-10	ALK, ITK, MAP2K1, SRC, FLT4, INSR, TYK2, EGFR, PTK2, ERBB3, ERBB2, BTK, FYN	180	114	18967	12.0161	4.84406e-07	4.85231e-08	4.39844e-08
BP	protein kinase B signaling	13	7.22222	1.03566e-11	TGFB1, STAT3, ILK, PIK3CB, PIK3R1, TNF, PIK3CG, PIK3CA, ERBB3, IL1B, ERBB2, CCL2, AKT1	180	81	19453	17.3449	2.96302e-08	9.2562e-10	8.02959e-10
BP	positive regulation of cytosolic calcium ion concentration	13	7.22222	2.10849e-08	APP, CALCA, PTGER2, C5AR1, FPR2, IL2, PIK3CG, EDNRA, EDNRB, CXCR1, CXCR2, CD38, CCR4	180	155	19453	9.06412	6.0322e-05	9.57186e-07	8.30342e-07
BP	negative regulation of neuron apoptotic process	13	7.22222	3.70281e-08	IL10, JUN, CEBPB, ROCK1, HIF1A, SIRT1, SOD1, PIK3CA, ERBB3, BCL2, CCL2, HMOX1, BCL2L1	180	163	19453	8.61926	0.000105932	1.5806e-06	1.37114e-06
BP	protein autophosphorylation	13	7.22222	1.24602e-07	ALK, RIPK3, SRC, FLT4, INSR, EGFR, PTK2, ERBB2, BTK, AKT1, FYN, PIM2, PRKD1	180	182	19453	7.71944	0.000356423	4.8157e-06	4.17754e-06
BP	peptidyl-serine phosphorylation	13	7.22222	1.40467e-07	ROCK1, CHUK, SRC, ILK, PRKCA, MAPK14, IKBKB, MAPK8, TBK1, BCL2, AKT1, MAPK1, PRKD1	180	184	19453	7.63554	0.000401796	5.35649e-06	4.64666e-06
BP	defense response to virus	13	7.22222	2.00265e-06	RIPK3, STAT1, PRF1, RELA, IL6, TBK1, PTPRC, IFNG, IL23A, CASP1, BCL2, TLR9, BCL2L1	180	236	19453	5.95313	0.00571321	5.35289e-05	4.64354e-05
MF	integrin binding	13	7.22222	3.94508e-08	ITGB1, APP, VCAM1, SRC, PRKCA, ITGAL, PTK2, ICAM1, ADAMTS5, ADAM17, CD40LG, IL1B, SPP1	180	160	18967	8.56149	2.31573e-05	1.44982e-06	1.3142e-06
MF	protein phosphatase binding	12	6.66667	9.55712e-10	MAPK8, TBK1, FLT4, ERBB2, STAT3, STAT6, PIK3R1, MAPK14, TP53, PTK2, EGFR, HSP90B1	180	91	18967	13.8952	5.61003e-07	5.10872e-08	4.63086e-08
BP	cellular response to reactive oxygen species	12	6.66667	1.60213e-12	JUN, MAPK8, CHUK, MMP2, MMP3, BTK, MAPK1, AKT1, FOS, MMP9, EGFR, MAPK3	180	53	19453	24.4692	4.58379e-09	1.76234e-10	1.5288e-10
BP	positive regulation of interleukin-8 production	12	6.66667	1.71013e-11	IL6, CALCA, NOS2, IL1B, STAT3, SERPINE1, TLR9, TNF, F3, TLR4, RELA, ELANE	180	65	19453	19.9518	4.89269e-08	1.43852e-09	1.24789e-09
BP	cellular response to hypoxia	12	6.66667	4.53948e-08	EGLN1, TGFB1, SRC, MDM2, BCL2, HMOX1, FOS, PTGS2, HIF1A, SIRT1, TP53, VEGFA	180	134	19453	9.67811	0.000129866	1.89656e-06	1.64523e-06
BP	defense response to Gram-positive bacterium	12	6.66667	6.63035e-08	P2RX7, CRP, APP, IL6, ADAM17, CALCA, TBK1, IL1B, PLA2G2A, C5AR1, CTSG, TNF	180	139	19453	9.32998	0.000189676	2.67082e-06	2.31689e-06
BP	regulation of apoptotic process	12	6.66667	1.7491e-05	ALK, CXCL10, RIPK3, STAT1, APEX1, CASP1, AKT1, SIRT1, TP53, CTSB, BCL2L1, MCL1	180	245	19453	5.29333	0.0488108	0.000342633	0.000297228
MF	protease binding	12	6.66667	9.81378e-09	ITGB1, DPP4, COL1A1, CASP3, SERPINE1, BCL2, MIF, TNF, TP53, F3, ELANE, INS	180	113	18967	11.19	5.76067e-06	4.12179e-07	3.73625e-07
MF	heparin binding	12	6.66667	1.09156e-06	ALK, ADAMTS5, CXCL10, APP, CXCL11, CXCL8, PTPRC, CTSG, F2, MPO, ELANE, VEGFA	180	179	18967	7.06406	0.000640539	3.20918e-05	2.909e-05
CC	extracellular matrix	12	6.66667	1.69514e-05	MMP12, COL1A1, ADAMTS5, TGFB1, MMP13, MMP16, MMP1, MMP2, MMP3, MMP8, MMP9, VEGFA	180	259	20647	5.31454	0.00559524	0.000330053	0.000277205
BP	cellular response to cadmium ion	11	6.11111	6.98372e-13	JUN, MAPK8, CHUK, HMOX1, MAPK1, AKT1, FOS, MMP9, EGFR, SOD1, MAPK3	180	36	19453	33.0221	1.99792e-09	8.6841e-11	7.5333e-11
BP	lipopolysaccharide-mediated signaling pathway	11	6.11111	3.85501e-12	NFKBIA, TGFB1, NOS3, IL1B, MAPK1, CCL2, AKT1, MAPK14, TNF, TLR4, MAPK3	180	42	19453	28.3046	1.10292e-08	3.67511e-10	3.18809e-10
BP	positive regulation of smooth muscle cell proliferation	11	6.11111	1.20422e-10	IL6, TGFB1, PIK3CA, STAT1, HMOX1, AKT1, IRAK4, PTGS2, TNF, TLR4, ELANE	180	58	19453	20.4965	3.44528e-07	9.06336e-09	7.86231e-09
BP	positive regulation of cytokine production	11	6.11111	8.32488e-10	IL10, IL1A, ITK, IFNG, SRC, IL1B, MIF, TNF, PIK3CG, SOD1, INS	180	70	19453	16.9828	2.38174e-06	5.1759e-08	4.49e-08
BP	positive regulation of endothelial cell proliferation	11	6.11111	2.47843e-09	IL10, JUN, EGF, FLT4, AKT1, PRKCA, PRKD1, HIF1A, SIRT1, F3, VEGFA	180	78	19453	15.241	7.09075e-06	1.36313e-07	1.1825e-07
BP	neutrophil chemotaxis	11	6.11111	4.60479e-09	CXCL10, CXCL11, CXCL8, CXCR1, IL1B, C5AR1, CXCR2, PDE4B, CCL2, CXCL2, PIK3CG	180	83	19453	14.3228	1.31742e-05	2.39449e-07	2.07718e-07
BP	MAPK cascade	11	6.11111	1.97533e-06	P2RX7, MAP2K1, TGFB1, PTPRC, IL1B, CAV1, CCL2, TNF, PSMB8, EGFR, MAPK3	180	157	19453	7.57194	0.00563547	5.32965e-05	4.62338e-05
BP	cell migration	11	6.11111	0.000261814	CDC42, ITGB1, TGFB1, PIK3CA, MMP2, RAC1, PIK3CB, MMP9, PTK2, PIK3CG, PAK4	180	278	19453	4.27624	0.527231	0.00326982	0.00283651
BP	phosphorylation	11	6.11111	0.00037452	ALK, ITK, ERBB3, PIK3CA, STAT3, AKT1, PIK3CB, IRAK4, PIK3CG, PAK4, MAPK3	180	291	19453	4.0852	0.657575	0.00435417	0.00377717
CC	lysosome	11	6.11111	0.000420059	ACE, SRC, IL1B, INSR, TLR9, HAS2, CTSG, MPO, CTSD, CTSB, SOD1	180	313	20647	4.03119	0.129832	0.00579331	0.00486568
MF	ubiquitin protein ligase binding	11	6.11111	0.000843453	NFKBIA, KCNH2, JUN, ERBB3, PARP1, MDM2, BCL2, HIF1A, TP53, RELA, EGFR	180	315	18967	3.67966	0.390621	0.0131065	0.0118805
CC	apical plasma membrane	11	6.11111	0.00305042	DPP4, ACE2, ADAM17, MGAM, ERBB3, CAV1, ERBB2, KCNMA1, AKR1A1, TLR9, CTSB	180	408	20647	3.09255	0.63623	0.0252423	0.0212004
CC	glutamatergic synapse	11	6.11111	0.00413319	CDC42, EGLN1, ITGB1, SRC, AKT1, PLAT, RAC1, MAPK14, RELA, PPP1CA, MAPK3	180	426	20647	2.96188	0.746127	0.029741	0.0249788
CC	caveola	10	5.55556	1.73733e-08	SRC, NOS3, CAV1, INSR, KCNMA1, HMOX1, MAPK1, PTGS2, SELE, MAPK3	180	75	20647	15.2941	5.75053e-06	4.79213e-07	4.02481e-07
BP	extracellular matrix disassembly	10	5.55556	3.17723e-10	MMP12, ADAMTS5, MMP13, MMP1, MMP2, MMP3, CTSG, MMP8, MMP9, ELANE	180	46	19453	23.494	9.09005e-07	2.16354e-08	1.87684e-08
BP	positive regulation of blood vessel endothelial cell migration	10	5.55556	5.78625e-10	ADAM17, TGFB1, NOS3, HSPB1, AKT1, PRKCA, PRKD1, HIF1A, SIRT1, VEGFA	180	49	19453	22.0556	1.65544e-06	3.67748e-08	3.19015e-08
BP	positive regulation of pri-miRNA transcription from RNA polymerase II promoter	10	5.55556	1.20937e-09	IL10, JUN, TGFB1, STAT3, FOS, HIF1A, TNF, TP53, RELA, EGFR	180	53	19453	20.391	3.46e-06	7.20583e-08	6.25093e-08
BP	positive regulation of interleukin-1 beta production	10	5.55556	1.04488e-08	P2RX7, APP, IL6, IFNG, STAT3, CASP1, HSPB1, TNF, TLR4, RELA	180	67	19453	16.1302	2.98936e-05	4.89896e-07	4.24976e-07
BP	positive regulation of NIK/NF-kappaB signaling	10	5.55556	1.99955e-08	APP, IL23A, IL1B, TLR9, ILK, MMP8, TNF, TLR4, RELA, EGFR	180	72	19453	15.01	5.72055e-05	9.22374e-07	8.00143e-07
BP	positive regulation of phosphatidylinositol 3-kinase signaling	10	5.55556	4.57561e-08	ERBB3, SRC, EGF, INSR, F2, SIRT1, TNF, PTK2, INS, VEGFA	180	79	19453	13.68	0.0001309	1.89656e-06	1.64523e-06
BP	regulation of blood pressure	10	5.55556	7.08083e-08	EDNRA, CALCA, ACE, EDNRB, NOS3, ANPEP, HMOX1, PTGS2, SOD1, PTGS1	180	83	19453	13.0207	0.000202562	2.8075e-06	2.43546e-06
BP	positive regulation of cell growth	10	5.55556	1.74343e-07	CDC42, ADAM17, ERBB2, BCL2, CD38, AKT1, F2, EGFR, IL2, INS	180	92	19453	11.747	0.00049867	6.31165e-06	5.47525e-06
CC	secretory granule	10	5.55556	1.53466e-07	CDC42, COL1A1, TGFB1, IL1B, PLA2G2A, CTSG, PLAT, MPO, ELANE, VEGFA	180	96	20647	11.9485	5.0796e-05	3.90748e-06	3.28181e-06
BP	calcium-mediated signaling	10	5.55556	1.74343e-07	APP, EDNRB, CXCL8, CXCR1, CXCR2, BTK, FPR2, SELE, CCR4, TNF	180	92	19453	11.747	0.00049867	6.31165e-06	5.47525e-06
BP	defense response to Gram-negative bacterium	10	5.55556	2.30294e-07	APP, IL6, CALCA, NOS2, IL23A, SERPINE1, TLR9, CTSG, PRKD1, TLR4	180	95	19453	11.376	0.000658654	7.74871e-06	6.72187e-06
BP	transforming growth factor beta receptor signaling pathway	10	5.55556	4.61869e-07	JUN, TGFB1, HPGD, PARP1, SRC, STAT3, FOS, SIRT1, TP53, PTK2	180	103	19453	10.4924	0.00132053	1.46772e-05	1.27322e-05
BP	response to virus	10	5.55556	8.08723e-07	IKBKB, TBK1, IFNG, CHUK, SRC, ODC1, HSPB1, PIM2, TNF, BCL2L1	180	110	19453	9.82475	0.00231108	2.40932e-05	2.09004e-05
BP	transmembrane receptor protein tyrosine kinase signaling pathway	10	5.55556	5.04576e-06	ALK, ERBB3, SRC, FLT4, INSR, ERBB2, FYN, PIK3CB, PTK2, EGFR	180	137	19453	7.88848	0.0143323	0.000114477	9.93069e-05
BP	negative regulation of inflammatory response	10	5.55556	1.0013e-05	IL10, IL4, ALOX5, IL2RA, STAT3, FPR2, PPARA, IL2, ELANE, SOD1	180	149	19453	7.25317	0.0282408	0.000207515	0.000180016
BP	defense response to bacterium	10	5.55556	0.000718424	IL10, ADAMTS5, CEBPB, NOS2, CASP1, TLR9, FPR2, MPO, TLR4, ELANE	180	261	19453	4.1407	0.872054	0.00778293	0.00675155
CC	ficolin-1-rich granule lumen	10	5.55556	1.45972e-06	CFD, PNP, ALOX5, GSTP1, MAPK1, MIF, MAPK14, CTSD, MMP9, CTSB	180	125	20647	9.17644	0.000483052	3.0198e-05	2.53627e-05
CC	endosome membrane	10	5.55556	0.000649072	ITGB1, INSR, ERBB2, TLR9, ECE1, UBA1, IRAK4, CTSD, TLR4, EGFR	180	273	20647	4.20167	0.193388	0.00826318	0.00694008
CC	early endosome	10	5.55556	0.00169029	APP, MAP2K1, VCAM1, MME, ERBB2, MAPK1, ECE1, TLR4, WLS, MAPK3	180	313	20647	3.66471	0.428767	0.0159853	0.0134257
CC	neuronal cell body	10	5.55556	0.00624262	P2RX7, CDC42, CALCA, TGFB1, MME, SRC, CASP3, CCR4, TNF, SOD1	180	382	20647	3.00276	0.874165	0.0421695	0.0354173
BP	positive regulation of vascular endothelial growth factor production	9	5	2.8928e-10	IL1A, IL6, TGFB1, IL1B, FLT4, C5AR1, PTGS2, HIF1A, RELA	180	31	19453	31.3758	8.27629e-07	2.0179e-08	1.75049e-08
BP	leukocyte cell-cell adhesion	9	5	3.82695e-10	ITGB1, CALCA, VCAM1, PTPRC, CD40LG, ROCK1, ITGAL, SELE, ICAM1	180	32	19453	30.3953	1.09489e-06	2.54537e-08	2.20806e-08
BP	collagen catabolic process	9	5	3.23969e-09	MMP12, MMP13, MMP16, MMP1, MMP2, MMP3, MMP8, MMP9, CTSB	180	41	19453	23.7232	9.2687e-06	1.71583e-07	1.48846e-07
BP	positive regulation of chemokine production	9	5	7.08317e-09	APP, IL6, ADAM17, IFNG, TLR9, HMOX1, HIF1A, TNF, TLR4	180	45	19453	21.6144	2.02648e-05	3.55401e-07	3.08304e-07
BP	response to hydrogen peroxide	9	5	7.08317e-09	COL1A1, STAT1, CASP3, MMP2, BCL2, HMOX1, FYN, SIRT1, SOD1	180	45	19453	21.6144	2.02648e-05	3.55401e-07	3.08304e-07
BP	positive regulation of B cell proliferation	9	5	8.50748e-09	IL4, PTPRC, BCL2, BTK, TLR9, CD38, MIF, TLR4, IL2	180	46	19453	21.1446	2.43396e-05	4.12396e-07	3.57747e-07
BP	positive regulation of nitric oxide biosynthetic process	9	5	1.01726e-08	APP, IFNG, IL1B, INSR, AKT1, MMP8, PTGS2, TNF, TLR4	180	47	19453	20.6947	2.91035e-05	4.84895e-07	4.20638e-07
BP	peptidyl-tyrosine phosphorylation	9	5	5.68917e-08	SRC, EGF, FLT4, INSR, ERBB2, BTK, FYN, PTK2, EGFR	180	58	19453	16.7698	0.000162754	2.32443e-06	2.01641e-06
BP	positive regulation of T cell proliferation	9	5	2.02889e-07	IL4, IL6, VCAM1, PTPRC, PNP, CD40LG, IL23A, IL1B, TYK2	180	68	19453	14.3037	0.000580297	7.07637e-06	6.13863e-06
BP	positive regulation of endothelial cell migration	9	5	2.02889e-07	EGF, FLT4, AKT1, PRKCA, PRKD1, RAC1, PIK3CB, PIK3CG, VEGFA	180	68	19453	14.3037	0.000580297	7.07637e-06	6.13863e-06
BP	platelet activation	9	5	2.2771e-07	IL6, CD40LG, PIK3CA, SRC, CTSG, PRKCA, PIK3CB, F2, MAPK14	180	69	19453	14.0964	0.000651265	7.74871e-06	6.72187e-06
BP	cellular response to hydrogen peroxide	9	5	2.2771e-07	IL6, RIPK3, SRC, APEX1, MDM2, FYN, STAT6, SIRT1, RELA	180	69	19453	14.0964	0.000651265	7.74871e-06	6.72187e-06
BP	positive regulation of interferon-gamma production	9	5	6.57051e-07	APP, IL23A, IL1B, PDE4B, TLR9, TYK2, TNF, TLR4, IL2	180	79	19453	12.312	0.00187806	1.99911e-05	1.7342e-05
BP	tumor necrosis factor-mediated signaling pathway	9	5	6.57051e-07	NFKBIA, IKBKB, CHUK, STAT1, ILK, TNF, TP53, PSMB8, RELA	180	79	19453	12.312	0.00187806	1.99911e-05	1.7342e-05
BP	cellular response to virus	9	5	2.70161e-06	MMP12, CXCL10, IL6, TGFB1, IFNG, CHUK, TYK2, MAPK14, HIF1A	180	95	19453	10.2384	0.00769952	6.8377e-05	5.93158e-05
BP	positive regulation of JNK cascade	9	5	3.68815e-06	CDC42, IL1A, APP, IL1B, FLT4, TLR9, MMP8, TNF, TLR4	180	99	19453	9.82475	0.0104963	8.86396e-05	7.68933e-05
BP	response to ethanol	9	5	9.88321e-06	VCAM1, HPGD, FYN, FOS, TYMS, PPARA, TNF, IL2, SOD1	180	113	19453	8.60752	0.02788	0.000206321	0.00017898
BP	response to oxidative stress	9	5	2.06878e-05	APP, MAPK8, HMOX1, AKT1, PTGS2, MPO, SIRT1, TP53, PTGS1	180	125	19453	7.7812	0.0574709	0.000397095	0.000344473
BP	positive regulation of canonical Wnt signaling pathway	9	5	3.23798e-05	COL1A1, TGFB1, SRC, EGF, CAV1, ILK, PSMB8, EGFR, WLS	180	133	19453	7.31316	0.0884785	0.000589848	0.000511683
BP	T cell receptor signaling pathway	9	5	5.17573e-05	IKBKB, ITK, PTPRC, PIK3CA, PDE4B, BTK, MAPK1, FYN, PSMB8	180	142	19453	6.84965	0.137639	0.000875893	0.000759822
BP	heart development	9	5	0.00103656	IL1A, MAP2K1, TGFB1, ERBB3, CASP3, MMP2, ERBB2, ECE1, PPARA	180	221	19453	4.40113	0.948549	0.0102651	0.0089048
BP	cellular response to DNA damage stimulus	9	5	0.0064802	PARP1, CASP3, BCL2, MAPK1, UBA1, SIRT1, TP53, MCL1, MAPK3	180	298	19453	3.26393	1	0.0455365	0.0395021
MF	heme binding	9	5	0.000113844	NOS2, SRC, NOS3, HMOX1, CYP3A4, PTGS2, MPO, IDO1, PTGS1	180	155	18967	6.11839	0.0646461	0.00230829	0.00209238
CC	receptor complex	9	5	0.000795921	ITGB1, ALK, APP, ERBB3, FLT4, INSR, ERBB2, TLR4, EGFR	180	225	20647	4.58822	0.231684	0.00908447	0.00762986
MF	oxidoreductase activity	9	5	0.00169923	HPGD, NOS2, MAOA, NOS3, SCD, FASN, APEX1, CYP3A4, XDH	180	233	18967	4.07017	0.631494	0.0208156	0.0188686
BP	negative regulation of anoikis	8	4.44444	2.27934e-10	ITGB1, PIK3CA, SRC, CAV1, BCL2, PTK2, BCL2L1, MCL1	180	19	19453	45.5041	6.52119e-07	1.62973e-08	1.41376e-08
BP	microglial cell activation	8	4.44444	8.45572e-09	IL4, APP, JUN, IFNG, C5AR1, TLR9, FPR2, TNF	180	30	19453	28.8193	2.41915e-05	4.12396e-07	3.57747e-07
BP	cellular response to vascular endothelial growth factor stimulus	8	4.44444	2.16619e-08	VCAM1, FLT4, HSPB1, AKT1, PRKD1, MAPK14, RELA, VEGFA	180	34	19453	25.4288	6.19728e-05	9.68016e-07	8.39737e-07
BP	extrinsic apoptotic signaling pathway in absence of ligand	8	4.44444	2.68683e-08	IL4, IL1A, ERBB3, IL1B, BCL2, IL2, BCL2L1, MCL1	180	35	19453	24.7022	7.68672e-05	1.16429e-06	1.01e-06
BP	positive regulation of protein localization to nucleus	8	4.44444	7.16601e-08	TGFB1, PARP1, SRC, AKT1, FYN, TYK2, F2, INS	180	40	19453	21.6144	0.000204998	2.8075e-06	2.43546e-06
BP	positive regulation of interleukin-12 production	8	4.44444	1.67798e-07	CD40LG, IFNG, IL23A, TLR9, MAPK14, TLR4, RELA, IDO1	180	45	19453	19.2128	0.000479954	6.31165e-06	5.47525e-06
BP	cellular response to beta-amyloid	8	4.44444	1.96388e-07	APP, VCAM1, PARP1, FYN, FPR2, TNF, TLR4, ICAM1	180	46	19453	18.7952	0.000561709	7.02089e-06	6.0905e-06
BP	response to cytokine	8	4.44444	3.07942e-07	STAT1, BCL2, FOS, TYMS, SELE, RELA, BCL2L1, MCL1	180	49	19453	17.6444	0.000880633	1.01231e-05	8.78165e-06
BP	epidermal growth factor receptor signaling pathway	8	4.44444	4.08661e-07	ADAM17, TGFB1, PIK3CA, SRC, EGF, AKT1, PTK2, EGFR	180	51	19453	16.9525	0.00116849	1.31322e-05	1.1392e-05
BP	sensory perception of pain	8	4.44444	5.35732e-07	P2RX7, ACE, EDNRB, MME, CCL2, PTGS2, PTGES, MAPK3	180	53	19453	16.3128	0.00153156	1.66543e-05	1.44473e-05
BP	positive regulation of vascular smooth muscle cell proliferation	8	4.44444	6.94453e-07	IL10, JUN, HPGD, SRC, MMP2, MDM2, TNF, MMP9	180	55	19453	15.7196	0.00198486	2.09067e-05	1.81362e-05
BP	chemokine-mediated signaling pathway	8	4.44444	3.65308e-06	CXCL10, CXCL11, CXCL8, CXCR1, CXCR2, CCL2, CCR4, CXCL2	180	70	19453	12.3511	0.010397	8.85407e-05	7.68075e-05
BP	peptidyl-threonine phosphorylation	8	4.44444	4.42022e-06	MAPK8, TBK1, ROCK1, BCL2, MAPK1, AKT1, PRKCA, PRKD1	180	72	19453	12.008	0.0125667	0.000102779	8.91591e-05
BP	protein catabolic process	8	4.44444	5.81924e-06	P2RX7, MME, CASP3, MMP2, AKT1, FYN, RELA, ELANE	180	75	19453	11.5277	0.0165111	0.000128023	0.000111058
BP	cellular response to mechanical stimulus	8	4.44444	7.56827e-06	COL1A1, MAPK8, TGFB1, IL1B, CASP1, PTGS2, TLR4, MAPK3	180	78	19453	11.0843	0.0214202	0.000161532	0.000140126
BP	female pregnancy	8	4.44444	1.44708e-05	THBD, TGFB1, ACE, HPGD, BCL2, CD38, FOS, IDO1	180	86	19453	10.0532	0.0405558	0.000287405	0.000249319
BP	protein processing	8	4.44444	1.44708e-05	P2RX7, ADAM17, MMP16, MME, CASP3, ECE1, CTSG, F3	180	86	19453	10.0532	0.0405558	0.000287405	0.000249319
BP	B cell differentiation	8	4.44444	2.09734e-05	IL10, ITGB1, IL4, ADAM17, VCAM1, PTPRC, CD40LG, PIK3R1	180	91	19453	9.50085	0.0582406	0.000399892	0.000346899
BP	positive regulation of peptidyl-tyrosine phosphorylation	8	4.44444	2.97172e-05	IL6, TGFB1, PTPRC, SRC, EGF, MIF, TP53, VEGFA	180	96	19453	9.00602	0.081508	0.000548758	0.000476038
BP	viral entry into host cell	8	4.44444	4.6805e-05	ITGB1, DPP4, ACE2, ANPEP, INSR, EGFR, CTSB, ICAM1	180	103	19453	8.39396	0.125333	0.0008064	0.000699538
MF	metallopeptidase activity	8	4.44444	4.74003e-06	ADAMTS5, ACE2, ADAM17, ACE, ANPEP, MMP2, MMP3, MMP9	180	71	18967	11.8729	0.00277854	0.000132721	0.000120306
BP	cellular response to insulin stimulus	8	4.44444	5.62538e-05	PIK3CA, PARP1, STAT1, SRC, INSR, AKT1, PIK3R1, GCK	180	106	19453	8.15639	0.148662	0.000929673	0.000806475
BP	integrin-mediated signaling pathway	8	4.44444	7.54378e-05	CDC42, ITGB1, CD40LG, SRC, ILK, PRKD1, ITGAL, PTK2	180	111	19453	7.78899	0.194132	0.00116623	0.00101168
BP	glucose homeostasis	8	4.44444	0.000143846	IL6, ALOX5, INSR, STAT3, AKT1, HIF1A, GCK, INS	180	123	19453	7.02909	0.337392	0.00202659	0.00175803
BP	cell proliferation	8	4.44444	0.0013267	EDNRA, SRC, SH2D2A, STAT3, ODC1, AKT1, PTGES, BCL2L1	180	178	19453	4.85718	0.977589	0.012553	0.0108895
BP	cell-cell adhesion	8	4.44444	0.00222598	VCAM1, SRC, BCL2, ITGAL, EGFR, ICAM1, PAK4, PPP1CA	180	195	19453	4.43373	0.998297	0.0191223	0.0165883
CC	secretory granule membrane	8	4.44444	3.87493e-05	PTPRC, MME, CXCR1, ANPEP, C5AR1, CXCR2, CD38, RAC1	180	106	20647	8.65702	0.0127444	0.000675054	0.000566964
CC	secretory granule lumen	8	4.44444	6.89508e-05	CFD, PNP, ROCK1, ALOX5, GSTP1, MIF, MAPK14, INS	180	116	20647	7.91073	0.022565	0.000992292	0.000833406
MF	growth factor activity	8	4.44444	0.00105761	IL10, IL4, IL6, TGFB1, EGF, F2, IL2, VEGFA	180	167	18967	5.04777	0.462672	0.014762	0.0133812
CC	cell-cell junction	8	4.44444	0.00146551	P2RX7, CDC42, ITK, APP, ADAM17, AKT1, PRKD1, PIK3R1	180	192	20647	4.7794	0.384574	0.0146995	0.0123458
CC	lamellipodium	8	4.44444	0.00155018	ITGB1, DPP4, PIK3CA, ROCK1, ILK, AKT1, RAC1, MYLK	180	194	20647	4.73013	0.401608	0.0150915	0.012675
MF	RNA polymerase II sequence-specific DNA binding transcription factor binding	8	4.44444	0.00202385	JUN, PARP1, STAT3, HSPB1, FOS, PPARA, HIF1A, TP53	180	187	18967	4.5079	0.695536	0.0233337	0.0211512
MF	transmembrane signaling receptor activity	8	4.44444	0.00294967	THBD, ERBB3, ERBB2, TLR9, SELE, TLR4, EGFR, ICAM1	180	200	18967	4.21489	0.823426	0.0333113	0.0301955
CC	transcription factor complex	8	4.44444	0.00439823	JUN, PARP1, APEX1, STAT3, FOS, HIF1A, TP53, RELA	180	234	20647	3.92156	0.767537	0.0309748	0.0260151
MF	transcription regulatory region sequence-specific DNA binding	8	4.44444	0.00754581	KCNH2, CEBPB, JUN, STAT3, FOS, TNF, TP53, RELA	180	238	18967	3.54192	0.988277	0.073949	0.067032
CC	basolateral plasma membrane	8	4.44444	0.0078882	HPGD, ERBB3, CAV1, ERBB2, C5AR1, TLR9, CD38, EGFR	180	261	20647	3.51588	0.927295	0.051196	0.0429984
CC	cytoplasmic vesicle	8	4.44444	0.0238578	MME, CAV1, ERBB2, BTK, HAS2, RAC1, WLS, SOD1	180	325	20647	2.82352	0.999662	0.125348	0.105277
BP	vascular endothelial growth factor receptor signaling pathway	7	3.88889	2.75873e-07	SRC, FLT4, FYN, PRKD1, MAPK14, PTK2, VEGFA	180	30	19453	25.2169	0.000788962	9.17439e-06	7.95862e-06
BP	response to progesterone	7	3.88889	8.64466e-07	TGFB1, PTGER2, CAV1, CD38, FOS, TYMS, RELA	180	36	19453	21.014	0.00247018	2.47289e-05	2.14519e-05
BP	liver regeneration	7	3.88889	8.64466e-07	IL10, IL6, CEBPB, TGFB1, HMOX1, TYMS, TNF	180	36	19453	21.014	0.00247018	2.47289e-05	2.14519e-05
BP	negative regulation of extrinsic apoptotic signaling pathway in absence of ligand	7	3.88889	1.02394e-06	IL1A, IL1B, BCL2, AKT1, TNF, BCL2L1, MCL1	180	37	19453	20.4461	0.00292521	2.89948e-05	2.51525e-05
BP	positive regulation of phosphorylation	7	3.88889	1.20669e-06	APP, EGF, FLT4, ILK, MIF, EGFR, VEGFA	180	38	19453	19.908	0.0034464	3.31841e-05	2.87866e-05
BP	phosphatidylinositol 3-kinase signaling	7	3.88889	1.20669e-06	ERBB3, PIK3CA, ERBB2, AKT1, PIK3CB, PIK3R1, PIK3CG	180	38	19453	19.908	0.0034464	3.31841e-05	2.87866e-05
BP	response to interleukin-1	7	3.88889	1.20669e-06	APP, SRC, IL1B, CD38, PRKCA, SELE, RELA	180	38	19453	19.908	0.0034464	3.31841e-05	2.87866e-05
BP	positive regulation of interleukin-10 production	7	3.88889	2.5651e-06	IL4, IL6, CD40LG, IL23A, STAT3, TLR9, TLR4	180	43	19453	17.5932	0.00731191	6.55018e-05	5.68216e-05
BP	T cell costimulation	7	3.88889	2.5651e-06	DPP4, CD40LG, PIK3CA, SRC, CAV1, AKT1, FYN	180	43	19453	17.5932	0.00731191	6.55018e-05	5.68216e-05
BP	embryo implantation	7	3.88889	3.37523e-06	CALCA, IL1B, MMP2, SPP1, PTGS2, MMP9, SOD1	180	45	19453	16.8112	0.00961008	8.32169e-05	7.21892e-05
BP	interleukin-1-mediated signaling pathway	7	3.88889	3.85206e-06	NFKBIA, IKBKB, IL1B, IRAK4, PSMB8, RELA, MAPK3	180	46	19453	16.4458	0.0109603	9.10486e-05	7.89831e-05
BP	regulation of insulin secretion	7	3.88889	3.85206e-06	IL6, IFNG, NOS2, ALOX5, IL1B, TNF, GCK	180	46	19453	16.4458	0.0109603	9.10486e-05	7.89831e-05
BP	cellular response to organic cyclic compound	7	3.88889	4.9703e-06	CEBPB, TGFB1, STAT1, IL1B, CCL2, TNF, PAK4	180	48	19453	15.7605	0.0141194	0.000113721	9.86505e-05
BP	receptor internalization	7	3.88889	7.12959e-06	ITGB1, CALCA, CXCL8, CXCR1, CAV1, INSR, CXCR2	180	51	19453	14.8334	0.0201912	0.000154474	0.000134004
BP	NIK/NF-kappaB signaling	7	3.88889	1.23737e-05	NFKBIA, ALK, RIPK3, CHUK, AKT1, PSMB8, RELA	180	56	19453	13.509	0.034782	0.000250984	0.000217724
BP	response to mechanical stimulus	7	3.88889	1.6784e-05	P2RX7, COL1A1, MAPK8, STAT1, SRC, MMP2, MPO	180	59	19453	12.8221	0.0468846	0.000331049	0.000287179
BP	response to glucocorticoid	7	3.88889	1.85076e-05	IL10, IL6, CASP3, BCL2, TYMS, PTGS2, TNF	180	60	19453	12.6084	0.0515731	0.000360079	0.000312362
BP	positive regulation of tyrosine phosphorylation of STAT protein	7	3.88889	3.80757e-05	IL4, IL6, IFNG, IL23A, FYN, TNF, IL2	180	68	19453	11.1251	0.103213	0.000680604	0.000590412
BP	insulin receptor signaling pathway	7	3.88889	4.4924e-05	PIK3CA, INSR, MAPK1, AKT1, PIK3R1, MAPK3, INS	180	70	19453	10.8072	0.120613	0.00078343	0.000679612
BP	apoptotic signaling pathway	7	3.88889	5.70121e-05	P2RX7, RIPK3, CASP3, CAV1, BTK, CD38, PRKCA	180	73	19453	10.3631	0.150508	0.000931741	0.000808269
BP	negative regulation of protein binding	7	3.88889	6.64217e-05	MAPK8, ACE, ROCK1, CAV1, AKT1, PPARA, PPP1CA	180	75	19453	10.0867	0.173073	0.00104954	0.000910454
BP	response to insulin	7	3.88889	7.15698e-05	IL10, COL1A1, FOS, MAPK14, PPARA, SIRT1, RELA	180	76	19453	9.95402	0.185164	0.00111852	0.000970299
BP	neuron apoptotic process	7	3.88889	0.000109533	APP, ERBB3, CASP3, BCL2, HIF1A, TP53, BCL2L1	180	82	19453	9.22568	0.269037	0.00158215	0.00137249
CC	platelet alpha granule lumen	7	3.88889	2.73706e-05	CFD, APP, TGFB1, EGF, ALB, SERPINE1, VEGFA	180	68	20647	11.8079	0.00901887	0.000503315	0.000422724
BP	cellular response to interleukin-1	7	3.88889	0.000117177	CEBPB, CXCL8, MMP2, CCL2, HAS2, HIF1A, RELA	180	83	19453	9.11452	0.28485	0.00168405	0.00146088
BP	positive regulation of autophagy	7	3.88889	0.000172384	TBK1, IFNG, ROCK1, TLR9, PIM2, PRKD1, PIK3CB	180	89	19453	8.50006	0.389351	0.00232555	0.00201738
BP	killing of cells of other organism	7	3.88889	0.000206778	CXCL10, CXCL11, CXCL8, PLA2G2A, PRF1, GZMB, CXCL2	180	92	19453	8.22289	0.446589	0.00270039	0.00234254
BP	wound healing	7	3.88889	0.000291692	COL1A1, TGFB1, ERBB3, CASP3, ERBB2, PPARA, INS	180	98	19453	7.71944	0.565975	0.00361143	0.00313285
BP	cellular response to interferon-gamma	7	3.88889	0.000325371	CDC42, NOS2, STAT1, CASP1, CCL2, TNF, TLR4	180	100	19453	7.56506	0.605856	0.00392642	0.0034061
BP	response to estradiol	7	3.88889	0.000343315	COL1A1, TGFB1, HPGD, CASP3, STAT3, CD38, PTGS2	180	101	19453	7.49015	0.625586	0.00410829	0.00356387
BP	regulation of inflammatory response	7	3.88889	0.000381523	ACE2, ALOX5, CASP1, PTGS2, SELE, RELA, PTGES	180	103	19453	7.34471	0.66437	0.00441764	0.00383222
BP	antimicrobial humoral immune response mediated by antimicrobial peptide	7	3.88889	0.000820561	CXCL10, APP, CXCL11, CALCA, CXCL8, F2, CXCL2	180	119	19453	6.35719	0.904496	0.00847543	0.00735229
BP	B cell receptor signaling pathway	7	3.88889	0.00169702	NFKBIA, ITK, PTPRC, BCL2, BTK, CD38, MAPK1	180	137	19453	5.52194	0.992244	0.0154758	0.013425
BP	gene expression	7	3.88889	0.00189399	EDNRA, TGFB1, EDNRB, AKT1, TLR4, IL2, SOD1	180	140	19453	5.40361	0.99559	0.0169709	0.014722
MF	scaffold protein binding	7	3.88889	4.75825e-05	KCNH2, IKBKB, MAP2K1, CHUK, SRC, NOS3, FYN	180	69	18967	10.6899	0.0275451	0.0010761	0.000975442
CC	RNA polymerase II transcription factor complex	7	3.88889	0.000748955	CEBPB, JUN, STAT1, STAT3, STAT6, FOS, HIF1A	180	124	20647	6.47531	0.219638	0.00885371	0.00743605
CC	dendritic spine	7	3.88889	0.00320654	CDC42, ITGB1, APP, PDE4B, RAC1, PTK2, PPP1CA	180	165	20647	4.8663	0.654606	0.0253223	0.0212677
CC	mitochondrial outer membrane	7	3.88889	0.0115235	MAOA, PLA2G2A, BCL2, HMOX1, RAC1, BCL2L1, MCL1	180	216	20647	3.71731	0.978429	0.0699525	0.0587516
MF	MAP kinase kinase activity	6	3.33333	7.39467e-07	MAPK10, MAP2K1, MAPK8, MAPK1, MAPK14, MAPK3	180	19	18967	33.2754	0.000433973	2.28846e-05	2.0744e-05
BP	response to beta-amyloid	6	3.33333	1.73847e-07	MMP12, MMP13, MMP2, MMP3, FYN, MMP9	180	15	19453	43.2289	0.000497252	6.31165e-06	5.47525e-06
BP	astrocyte activation	6	3.33333	3.52917e-07	APP, IFNG, IL1B, C5AR1, FPR2, TNF	180	17	19453	38.1431	0.00100919	1.14698e-05	9.94986e-06
BP	positive regulation of cellular protein metabolic process	6	3.33333	4.85019e-07	NFKBIA, TGFB1, MAPK1, AKT1, MAPK3, INS	180	18	19453	36.0241	0.00138668	1.52435e-05	1.32234e-05
BP	response to muscle stretch	6	3.33333	8.64645e-07	NFKBIA, JUN, PIK3CA, FOS, MAPK14, RELA	180	20	19453	32.4217	0.00247069	2.47289e-05	2.14519e-05
BP	positive regulation of superoxide anion generation	6	3.33333	8.64645e-07	CRP, APP, TGFB1, GSTP1, FPR2, SOD1	180	20	19453	32.4217	0.00247069	2.47289e-05	2.14519e-05
BP	peptidyl-tyrosine autophosphorylation	6	3.33333	1.44687e-06	ALK, ITK, SRC, INSR, EGFR, MAPK3	180	22	19453	29.4742	0.00413093	3.94099e-05	3.41874e-05
BP	positive regulation of glycolytic process	6	3.33333	2.3007e-06	P2RX7, APP, IFNG, INSR, HIF1A, INS	180	24	19453	27.0181	0.00656071	5.98183e-05	5.18914e-05
BP	positive regulation of protein metabolic process	6	3.33333	2.3007e-06	NFKBIA, APP, MAPK8, TGFB1, AKT1, INS	180	24	19453	27.0181	0.00656071	5.98183e-05	5.18914e-05
BP	positive regulation of nitric-oxide synthase activity	6	3.33333	2.85451e-06	DHFR, AKT1, PIK3CB, HIF1A, TNF, INS	180	25	19453	25.9373	0.00813351	7.16131e-05	6.21232e-05
BP	positive regulation of interferon-alpha production	6	3.33333	3.5079e-06	MMP12, TBK1, CHUK, STAT1, TLR9, TLR4	180	26	19453	24.9397	0.00998592	8.57486e-05	7.43854e-05
BP	positive regulation of immunoglobulin production	6	3.33333	4.27317e-06	IL10, IL6, PTPRC, BTK, TLR9, IL2	180	27	19453	24.016	0.0121511	0.000100174	8.68994e-05
BP	leukocyte migration	6	3.33333	5.16348e-06	ROCK1, SRC, PDE4B, FYN, MMP9, ICAM1	180	28	19453	23.1583	0.0146642	0.000114477	9.93069e-05
BP	negative regulation of intrinsic apoptotic signaling pathway	6	3.33333	5.16348e-06	SRC, BCL2, AKT1, MMP9, BCL2L1, MCL1	180	28	19453	23.1583	0.0146642	0.000114477	9.93069e-05
BP	response to gamma radiation	6	3.33333	5.16348e-06	IL1A, CXCL10, PTPRC, PARP1, BCL2, TP53	180	28	19453	23.1583	0.0146642	0.000114477	9.93069e-05
BP	positive regulation of mitotic nuclear division	6	3.33333	7.37627e-06	IL1A, EGF, IL1B, INSR, TNF, INS	180	30	19453	21.6144	0.0208825	0.000158618	0.000137598
BP	insulin-like growth factor receptor signaling pathway	6	3.33333	8.7295e-06	MAP2K1, PIK3CA, MAPK1, AKT1, PIK3R1, MAPK3	180	31	19453	20.9172	0.0246659	0.00018384	0.000159478
BP	macrophage differentiation	6	3.33333	1.02693e-05	CDC42, IFNG, PARP1, SIRT1, MMP9, VEGFA	180	32	19453	20.2635	0.0289532	0.000211296	0.000183296
BP	positive regulation of macroautophagy	6	3.33333	1.20133e-05	IL4, TBK1, HMOX1, PIM2, HIF1A, SIRT1	180	33	19453	19.6495	0.0337863	0.000245414	0.000212892
BP	positive regulation of reactive oxygen species metabolic process	6	3.33333	1.398e-05	ACE2, RIPK3, F2, MAPK14, TP53, XDH	180	34	19453	19.0716	0.0392078	0.00028157	0.000244257
BP	response to cAMP	6	3.33333	3.574e-05	COL1A1, THBD, STAT1, PLAT, FOS, RELA	180	41	19453	15.8154	0.0971997	0.00064287	0.000557679
MF	non-membrane spanning protein tyrosine kinase activity	6	3.33333	7.09255e-05	ITK, SRC, BTK, FYN, TYK2, PTK2	180	46	18967	13.7442	0.0407799	0.00148944	0.00135012
BP	response to nicotine	6	3.33333	3.574e-05	VCAM1, CASP3, MMP2, BCL2, HMOX1, MAPK1	180	41	19453	15.8154	0.0971997	0.00064287	0.000557679
BP	ovarian follicle development	6	3.33333	4.02692e-05	CEBPB, MMP2, BCL2, BCL2L1, SOD1, VEGFA	180	42	19453	15.4389	0.108823	0.00071534	0.000620545
BP	positive regulation of protein import into nucleus	6	3.33333	4.52302e-05	TGFB1, IFNG, PRKD1, PIK3R1, MAPK14, PTGS2	180	43	19453	15.0798	0.121383	0.00078399	0.000680098
BP	T cell proliferation	6	3.33333	5.06511e-05	P2RX7, PTPRC, IL23A, SH2D2A, PIK3CG, IDO1	180	44	19453	14.7371	0.134905	0.000862274	0.000748008
BP	JAK-STAT cascade	6	3.33333	5.06511e-05	IFNG, STAT1, STAT3, CCL2, STAT6, TYK2	180	44	19453	14.7371	0.134905	0.000862274	0.000748008
BP	osteoclast differentiation	6	3.33333	5.65606e-05	TGFB1, GLO1, FOS, PIK3R1, MAPK14, TNF	180	45	19453	14.4096	0.149409	0.000929673	0.000806475
BP	vasodilation	6	3.33333	6.29884e-05	CALCA, EDNRB, NOS3, KCNMA1, TNF, INS	180	46	19453	14.0964	0.16491	0.00100641	0.000873041
BP	negative regulation of protein catabolic process	6	3.33333	6.29884e-05	NOS2, FYN, HMGCR, RELA, EGFR, INS	180	46	19453	14.0964	0.16491	0.00100641	0.000873041
BP	positive regulation of JAK-STAT cascade	6	3.33333	6.99653e-05	IL10, IL6, IL23A, TYK2, F2, TNF	180	47	19453	13.7965	0.181415	0.00109946	0.000953758
BP	thymus development	6	3.33333	7.75229e-05	MAP2K1, RIPK3, BCL2, MAPK1, SOD1, MAPK3	180	48	19453	13.509	0.198926	0.00119202	0.00103406
BP	negative regulation of T cell proliferation	6	3.33333	8.56936e-05	IL10, CEBPB, TGFB1, IL2RA, PLA2G2A, IDO1	180	49	19453	13.2333	0.217436	0.00131061	0.00113693
BP	positive regulation of phagocytosis	6	3.33333	9.45108e-05	IFNG, IL1B, BTK, FPR2, TNF, SOD1	180	50	19453	12.9687	0.236932	0.00140782	0.00122126
BP	response to activity	6	3.33333	9.45108e-05	IL10, IL6, PIK3CA, MMP2, FOS, TNF	180	50	19453	12.9687	0.236932	0.00140782	0.00122126
BP	intrinsic apoptotic signaling pathway in response to DNA damage	6	3.33333	0.000104009	BCL2, HMOX1, PIK3R1, TNF, BCL2L1, MCL1	180	51	19453	12.7144	0.25739	0.00150997	0.00130988
BP	positive regulation of protein complex assembly	6	3.33333	0.000149524	TGFB1, IFNG, MMP1, MMP3, TNF, VEGFA	180	55	19453	11.7897	0.348071	0.00209627	0.00181848
BP	positive regulation of protein localization to plasma membrane	6	3.33333	0.00016297	ITGB1, IFNG, AKT1, PIK3R1, TNF, EGFR	180	56	19453	11.5792	0.372678	0.00220898	0.00191625
BP	cellular defense response	6	3.33333	0.00016297	ITGB1, ITK, C5AR1, CXCR2, PRF1, RELA	180	56	19453	11.5792	0.372678	0.00220898	0.00191625
BP	cellular senescence	6	3.33333	0.000177321	MAPK10, MAP2K1, MAPK8, MIF, MAPK14, TP53	180	57	19453	11.376	0.397917	0.00238093	0.00206541
BP	JNK cascade	6	3.33333	0.000226205	MAPK10, MAPK8, IL1B, IRAK4, TNF, TLR4	180	60	19453	10.8072	0.476514	0.00294066	0.00255097
BP	negative regulation of autophagy	6	3.33333	0.000284722	IL10, STAT3, BCL2, AKT1, BCL2L1, MCL1	180	63	19453	10.2926	0.557231	0.00354046	0.00307129
BP	humoral immune response	6	3.33333	0.000306573	IL6, IFNG, ALOX5, BCL2, CCL2, TNF	180	64	19453	10.1318	0.58407	0.00376308	0.00326441
BP	cellular response to amino acid stimulus	6	3.33333	0.000306573	COL1A1, CEBPB, MMP2, TNF, EGFR, BCL2L1	180	64	19453	10.1318	0.58407	0.00376308	0.00326441
MF	transmembrane receptor protein tyrosine kinase activity	6	3.33333	0.000153966	ALK, ERBB3, FLT4, INSR, ERBB2, EGFR	180	54	18967	11.708	0.0864204	0.00292038	0.00264721
BP	glucose metabolic process	6	3.33333	0.000329671	PIK3CA, AKT1, MAPK14, TNF, GCK, INS	180	65	19453	9.9759	0.610676	0.00396159	0.00343661
BP	response to ischemia	6	3.33333	0.000354063	P2RX7, CAV1, BCL2, PIK3CB, TP53, RELA	180	66	19453	9.82475	0.636927	0.00421589	0.00365721
BP	learning or memory	6	3.33333	0.000406916	APP, MME, SRC, CASP3, MAPK1, EGFR	180	68	19453	9.53578	0.687897	0.00463657	0.00402214
BP	positive regulation of kinase activity	6	3.33333	0.000530253	ALK, ERBB3, FLT4, INSR, ERBB2, EGFR	180	72	19453	9.00602	0.780731	0.00590087	0.0051189
BP	response to toxic substance	6	3.33333	0.000908565	CHUK, EPHX2, MDM2, BCL2, FOS, TYMS	180	81	19453	8.00535	0.92577	0.00914964	0.00793715
BP	ossification	6	3.33333	0.00125356	COL1A1, CALCA, BCL2, SPP1, MMP9, EGFR	180	87	19453	7.45326	0.972366	0.0119507	0.010367
BP	protein import into nucleus	6	3.33333	0.00298969	MMP12, NFKBIA, STAT3, AKT1, PIK3R1, TP53	180	106	19453	6.1173	0.99981	0.0242224	0.0210125
BP	positive regulation of sequence-specific DNA binding transcription factor activity	6	3.33333	0.00472698	IL10, APP, IL6, IL1B, AKT1, TNF	180	118	19453	5.4952	0.999999	0.0353258	0.0306446
BP	Notch signaling pathway	6	3.33333	0.00489831	NFKBIA, CFD, APP, ADAM17, TGFB1, IL2RA	180	119	19453	5.44902	0.999999	0.0363875	0.0315655
BP	kidney development	6	3.33333	0.00489831	ACE, HPGD, MME, ODC1, HAS2, VEGFA	180	119	19453	5.44902	0.999999	0.0363875	0.0315655
BP	multicellular organism development	6	3.33333	0.0107699	ALK, ERBB3, FLT4, INSR, ERBB2, EGFR	180	144	19453	4.50301	1	0.0693737	0.0601805
BP	regulation of cell shape	6	3.33333	0.0130249	CCL2, FYN, RAC1, F2, PTK2, VEGFA	180	151	19453	4.29426	1	0.0795964	0.0690484
MF	virus receptor activity	6	3.33333	0.00096084	ITGB1, DPP4, ACE2, ANPEP, EGFR, ICAM1	180	80	18967	7.90292	0.431233	0.0139111	0.0126099
CC	ruffle membrane	6	3.33333	0.00187496	ITGB1, ADAM17, SRC, ERBB2, RAC1, EGFR	180	101	20647	6.81419	0.462698	0.0172392	0.0144789
CC	melanosome	6	3.33333	0.00204369	ITGB1, FASN, RAC1, CTSD, HSP90B1, CTSB	180	103	20647	6.68188	0.491938	0.0178016	0.0149512
MF	protein N-terminus binding	6	3.33333	0.00360683	MAP2K1, TGFB1, PARP1, MDM2, TP53, RELA	180	108	18967	5.85401	0.880092	0.0385602	0.0349534
MF	histone deacetylase binding	6	3.33333	0.00888898	CEBPB, MAPK8, PARP1, HIF1A, TP53, RELA	180	134	18967	4.71816	0.994706	0.0843019	0.0764165
CC	nuclear envelope	6	3.33333	0.0358045	PARP1, ALOX5, INSR, RAC1, SIRT1, MAPK3	180	209	20647	3.29298	0.999994	0.179565	0.150813
MF	MAP kinase activity	5	2.77778	1.27765e-05	MAPK10, MAPK8, MAPK1, MAPK14, MAPK3	180	16	18967	32.9288	0.0074718	0.000326634	0.000296081
BP	cellular response to UV-A	5	2.77778	2.17528e-06	MME, MMP1, MMP2, MMP3, MMP9	180	11	19453	49.1237	0.00620416	5.76047e-05	4.9971e-05
BP	positive regulation of production of miRNAs involved in gene silencing by miRNA	5	2.77778	3.23948e-06	IL6, MAP2K1, TGFB1, TP53, EGFR	180	12	19453	45.0301	0.00922534	8.05644e-05	6.98882e-05
BP	negative regulation of fibrinolysis	5	2.77778	4.64563e-06	THBD, PLAU, SERPINE1, PLAT, F2	180	13	19453	41.5662	0.0132032	0.000107149	9.29501e-05
BP	positive regulation of MHC class II biosynthetic process	5	2.77778	8.74202e-06	IL10, IL4, IFNG, SIRT1, TLR4	180	15	19453	36.0241	0.0247009	0.00018384	0.000159478
BP	positive regulation of nitric-oxide synthase biosynthetic process	5	2.77778	1.91786e-05	IFNG, STAT1, TLR9, CCL2, TLR4	180	18	19453	30.0201	0.0533924	0.000370614	0.000321502
BP	stress-activated MAPK cascade	5	2.77778	2.41187e-05	IKBKB, MAPK8, MAPK1, MAPK14, MAPK3	180	19	19453	28.4401	0.0666775	0.000456818	0.000396282
BP	negative regulation of oxidative stress-induced intrinsic apoptotic signaling pathway	5	2.77778	2.99323e-05	HSPB1, AKT1, FYN, SIRT1, INS	180	20	19453	27.0181	0.082073	0.000548758	0.000476038
BP	leukocyte tethering or rolling	5	2.77778	2.99323e-05	ITGB1, VCAM1, ROCK1, SELE, TNF	180	20	19453	27.0181	0.082073	0.000548758	0.000476038
BP	vasoconstriction	5	2.77778	2.99323e-05	CRP, EDNRA, ACE, EDNRB, CAV1	180	20	19453	27.0181	0.082073	0.000548758	0.000476038
BP	MyD88-dependent toll-like receptor signaling pathway	5	2.77778	4.45464e-05	IKBKB, BTK, TLR9, IRAK4, TLR4	180	22	19453	24.5619	0.119663	0.000781611	0.000678034
BP	negative regulation of proteolysis	5	2.77778	5.35382e-05	AKT1, PLAT, F2, TP53, INS	180	23	19453	23.494	0.142022	0.000890229	0.000772258
BP	nitric oxide biosynthetic process	5	2.77778	5.35382e-05	NOS2, NOS3, CAV1, AKT1, TLR4	180	23	19453	23.494	0.142022	0.000890229	0.000772258
BP	positive regulation of monocyte chemotaxis	5	2.77778	5.35382e-05	CXCL10, APP, SERPINE1, FPR2, PLA2G7	180	23	19453	23.494	0.142022	0.000890229	0.000772258
BP	cellular response to organic substance	5	2.77778	6.37857e-05	IL1B, STAT3, CASP1, BCL2, STAT6	180	24	19453	22.515	0.166813	0.00101348	0.00087918
BP	cell aging	5	2.77778	7.53917e-05	BCL2, MIF, SIRT1, TP53, SOD1	180	25	19453	21.6144	0.194026	0.00116623	0.00101168
BP	positive regulation of interleukin-17 production	5	2.77778	8.84615e-05	IL6, TGFB1, IL23A, TYK2, IL2	180	26	19453	20.7831	0.223609	0.00133158	0.00115512
BP	toll-like receptor 4 signaling pathway	5	2.77778	8.84615e-05	NFKBIA, CHUK, IRAK4, TLR4, RELA	180	26	19453	20.7831	0.223609	0.00133158	0.00115512
BP	negative regulation of pri-miRNA transcription from RNA polymerase II promoter	5	2.77778	0.000103103	APP, TGFB1, PPARA, HIF1A, RELA	180	27	19453	20.0134	0.255463	0.00150446	0.00130509
BP	regulation of multicellular organism growth	5	2.77778	0.000103103	FTO, APP, PIK3CA, STAT3, SOD1	180	27	19453	20.0134	0.255463	0.00150446	0.00130509
BP	positive regulation of neutrophil chemotaxis	5	2.77778	0.000103103	CXCL8, IL23A, C5AR1, CXCR2, RAC1	180	27	19453	20.0134	0.255463	0.00150446	0.00130509
BP	negative regulation of extrinsic apoptotic signaling pathway via death domain receptors	5	2.77778	0.000119426	NOS3, SERPINE1, HMOX1, BCL2L1, ICAM1	180	28	19453	19.2986	0.289438	0.00169522	0.00147058
BP	activation of phospholipase C activity	5	2.77778	0.000157569	ITK, EDNRA, C5AR1, SELE, EGFR	180	30	19453	18.012	0.362908	0.00216982	0.00188228
BP	regulation of ERK1 and ERK2 cascade	5	2.77778	0.00017962	IL1B, GSTP1, ERBB2, HMGCR, EGFR	180	31	19453	17.431	0.401864	0.00240052	0.00208241
BP	positive regulation of phosphatidylinositol 3-kinase activity	5	2.77778	0.000203812	CDC42, TGFB1, SRC, PRKD1, PTK2	180	32	19453	16.8863	0.441872	0.00268603	0.00233008
BP	response to antibiotic	5	2.77778	0.000203812	CASP3, MDM2, CCR4, TP53, SOD1	180	32	19453	16.8863	0.441872	0.00268603	0.00233008
BP	positive regulation of cytokine production involved in inflammatory response	5	2.77778	0.000203812	IL6, STAT3, HIF1A, TNF, TLR4	180	32	19453	16.8863	0.441872	0.00268603	0.00233008
BP	pyroptosis	5	2.77778	0.000259106	CASP6, CASP3, CASP1, GZMB, ELANE	180	34	19453	15.893	0.523552	0.00325019	0.00281948
BP	positive regulation of interleukin-2 production	5	2.77778	0.000361152	IL1A, PTPRC, PNP, IL1B, PDE4B	180	37	19453	14.6044	0.64422	0.00421589	0.00365721
BP	negative regulation of endothelial cell apoptotic process	5	2.77778	0.000361152	IL10, IL4, SERPINE1, ICAM1, PAK4	180	37	19453	14.6044	0.64422	0.00421589	0.00365721
BP	positive regulation of neuron death	5	2.77778	0.000361152	APP, IFNG, PARP1, FYN, FOS	180	37	19453	14.6044	0.64422	0.00421589	0.00365721
BP	regulation of angiogenesis	5	2.77778	0.000361152	EGLN1, IL6, ERBB2, HMOX1, PIK3CG	180	37	19453	14.6044	0.64422	0.00421589	0.00365721
BP	positive regulation of glucose import	5	2.77778	0.000361152	INSR, AKT1, PIK3R1, MAPK14, INS	180	37	19453	14.6044	0.64422	0.00421589	0.00365721
BP	reactive oxygen species metabolic process	5	2.77778	0.00040076	P2RX7, RIPK3, BCL2, TP53, SOD1	180	38	19453	14.22	0.68235	0.0045847	0.00397714
BP	T cell homeostasis	5	2.77778	0.00040076	P2RX7, TGFB1, RIPK3, CASP3, BCL2	180	38	19453	14.22	0.68235	0.0045847	0.00397714
BP	positive regulation of epithelial cell migration	5	2.77778	0.000443376	JUN, IFNG, SRC, HIF1A, PTK2	180	39	19453	13.8554	0.718826	0.00501208	0.00434789
BP	negative regulation of endothelial cell proliferation	5	2.77778	0.000443376	STAT1, ALOX5, CAV1, TNF, XDH	180	39	19453	13.8554	0.718826	0.00501208	0.00434789
BP	acute-phase response	5	2.77778	0.00059055	CRP, IL6, CEBPB, F2, INS	180	42	19453	12.8657	0.815492	0.00647116	0.00561362
BP	negative regulation of MAP kinase activity	5	2.77778	0.000836709	IL1B, GSTP1, CAV1, HMGCR, PIK3CB	180	46	19453	11.747	0.908812	0.00851597	0.00738746
BP	B cell proliferation	5	2.77778	0.000836709	IL10, PTPRC, CD40LG, BCL2, CD38	180	46	19453	11.747	0.908812	0.00851597	0.00738746
BP	cellular response to epidermal growth factor stimulus	5	2.77778	0.000983535	COL1A1, ERBB2, AKT1, FOS, EGFR	180	48	19453	11.2575	0.940112	0.00983535	0.008532
BP	Fc-epsilon receptor signaling pathway	5	2.77778	0.000983535	MAPK10, IKBKB, MAPK8, BTK, PSMB8	180	48	19453	11.2575	0.940112	0.00983535	0.008532
BP	response to heat	5	2.77778	0.00114759	CALCA, NOS3, HSPB1, AKT1, SOD1	180	50	19453	10.8072	0.962565	0.0112401	0.00975058
BP	ephrin receptor signaling pathway	5	2.77778	0.00114759	SRC, MMP2, FYN, MMP9, PTK2	180	50	19453	10.8072	0.962565	0.0112401	0.00975058
BP	extrinsic apoptotic signaling pathway	5	2.77778	0.00132992	P2RX7, TGFB1, PTPRC, IFNG, TNF	180	52	19453	10.3916	0.977795	0.012553	0.0108895
BP	positive regulation of cysteine-type endopeptidase activity involved in apoptotic process	5	2.77778	0.00132992	APP, CASP1, SIRT1, TNF, CTSD	180	52	19453	10.3916	0.977795	0.012553	0.0108895
BP	ERK1 and ERK2 cascade	5	2.77778	0.00153157	MAP2K1, EGF, MAPK1, TLR4, MAPK3	180	54	19453	10.0067	0.987539	0.0141757	0.0122972
BP	positive regulation of epithelial to mesenchymal transition	5	2.77778	0.00163997	COL1A1, IL6, TGFB1, IL1B, PTK2	180	55	19453	9.82475	0.990866	0.0150814	0.0130828
BP	negative regulation of cell cycle	5	2.77778	0.00163997	TGFB1, HPGD, CASP3, PTGS2, SIRT1	180	55	19453	9.82475	0.990866	0.0150814	0.0130828
BP	negative regulation of cysteine-type endopeptidase activity involved in apoptotic process	5	2.77778	0.00175358	SRC, AKT1, PTGS2, TNF, VEGFA	180	56	19453	9.64931	0.993405	0.0157712	0.0136813
BP	positive regulation of neuron apoptotic process	5	2.77778	0.00255204	CDC42, APP, CASP3, TNF, TP53	180	62	19453	8.7155	0.999332	0.0214042	0.0185678
BP	T cell activation	5	2.77778	0.00270576	DPP4, IL4, ITK, PTPRC, PIK3CG	180	63	19453	8.57716	0.99957	0.0224303	0.0194579
BP	phagocytosis	5	2.77778	0.00396297	ITGB1, PIK3CA, ITGAL, TLR4, ELANE	180	70	19453	7.71944	0.999988	0.0307992	0.0267178
BP	cellular response to xenobiotic stimulus	5	2.77778	0.00416989	KCNH2, NOS2, IL1B, PDE4B, TP53	180	71	19453	7.61072	0.999994	0.0321452	0.0278854
BP	positive regulation of epithelial cell proliferation	5	2.77778	0.00438399	TGFB1, ERBB2, C5AR1, EGFR, VEGFA	180	72	19453	7.50502	0.999997	0.0329163	0.0285543
BP	cell chemotaxis	5	2.77778	0.0053144	VCAM1, CXCR1, CXCR2, RAC1, CCR4	180	76	19453	7.11001	1	0.0385766	0.0334645
BP	cellular oxidant detoxification	5	2.77778	0.0053144	GSTP1, ALB, PTGS2, PTGES, PTGS1	180	76	19453	7.11001	1	0.0385766	0.0334645
BP	response to wounding	5	2.77778	0.0053144	EDNRA, TGFB1, CASP3, RAC1, F2	180	76	19453	7.11001	1	0.0385766	0.0334645
BP	negative regulation of ERK1 and ERK2 cascade	5	2.77778	0.00755288	ACE2, PTPRC, GSTP1, TLR9, TLR4	180	84	19453	6.43287	1	0.0520512	0.0451535
BP	blood coagulation	5	2.77778	0.0107262	THBD, PLAU, PLAT, F2, F3	180	93	19453	5.81033	1	0.0692481	0.0600715
BP	phospholipase C-activating G-protein coupled receptor signaling pathway	5	2.77778	0.0115318	CALCA, EDNRB, C5AR1, CXCR2, FPR2	180	95	19453	5.68801	1	0.0731834	0.0634853
BP	cell morphogenesis	5	2.77778	0.0151395	P2RX7, TGFB1, ILK, MAPK14, EGFR	180	103	19453	5.24622	1	0.0902064	0.0782525
BP	cell-matrix adhesion	5	2.77778	0.018265	ITGB1, VCAM1, ILK, RAC1, ITGAL	180	109	19453	4.95744	1	0.10134	0.0879106
BP	male gonad development	5	2.77778	0.0199671	ACE, INSR, BCL2, TLR9, BCL2L1	180	112	19453	4.82465	1	0.108567	0.0941796
BP	negative regulation of transforming growth factor beta receptor signaling pathway	5	2.77778	0.0211545	ADAM17, CAV1, PPARA, SIRT1, TP53	180	114	19453	4.74001	1	0.113939	0.0988404
BP	cellular calcium ion homeostasis	5	2.77778	0.0211545	EDNRA, TGFB1, CAV1, PIK3CB, ELANE	180	114	19453	4.74001	1	0.113939	0.0988404
BP	response to bacterium	5	2.77778	0.0243094	CFD, NOS2, CAV1, CCL2, CCR4	180	119	19453	4.54085	1	0.127803	0.110867
BP	osteoblast differentiation	5	2.77778	0.0306721	COL1A1, FASN, SPP1, AKT1, MAPK14	180	128	19453	4.22157	1	0.152032	0.131885
BP	adenylate cyclase-activating G-protein coupled receptor signaling pathway	5	2.77778	0.0337864	CXCL10, APP, CXCL11, CALCA, PTGER2	180	132	19453	4.09364	1	0.164615	0.142801
MF	transcription coactivator binding	5	2.77778	0.00107953	STAT1, STAT6, PPARA, HIF1A, RELA	180	48	18967	10.9763	0.469549	0.014762	0.0133812
MF	chemokine activity	5	2.77778	0.00125914	CXCL10, CXCL11, CXCL8, CCL2, CXCL2	180	50	18967	10.5372	0.522687	0.0162121	0.0146957
CC	extrinsic component of cytoplasmic side of plasma membrane	5	2.77778	0.00392049	SRC, AKT1, FYN, RAC1, PTK2	180	74	20647	7.75038	0.727531	0.0288374	0.0242199
CC	endocytic vesicle membrane	5	2.77778	0.00392049	ACE2, NOS3, CAV1, MDM2, WLS	180	74	20647	7.75038	0.727531	0.0288374	0.0242199
CC	apical part of cell	5	2.77778	0.0045195	CDC42, APP, VCAM1, C5AR1, PLAT	180	77	20647	7.44841	0.776724	0.0311657	0.0261755
CC	azurophil granule lumen	5	2.77778	0.00813099	TTR, MAPK1, CTSG, MPO, ELANE	180	91	20647	6.3025	0.932953	0.0517569	0.0434695
CC	Schaffer collateral - CA1 synapse	5	2.77778	0.0116235	CDC42, ITGB1, ROCK1, FYN, PLAT	180	101	20647	5.67849	0.97914	0.0699525	0.0587516
CC	Golgi lumen	5	2.77778	0.0141192	APP, TGFB1, MMP16, F2, INS	180	107	20647	5.36007	0.990966	0.0819904	0.068862
MF	cysteine-type endopeptidase activity	5	2.77778	0.0144198	CASP6, CASP3, CASP1, CTSD, CTSB	180	99	18967	5.32183	0.999802	0.128467	0.116451
CC	peroxisome	5	2.77778	0.0164399	NOS2, EPHX2, TKT, XDH, SOD1	180	112	20647	5.12078	0.995859	0.0935408	0.0785629
MF	kinase binding	5	2.77778	0.0180944	LDHB, CEBPB, SRC, CASP1, EGFR	180	106	18967	4.97039	0.999978	0.15132	0.137166
CC	late endosome	5	2.77778	0.0470799	MAP2K1, SRC, INSR, MAPK1, MAPK3	180	156	20647	3.67646	1	0.225847	0.189684
MF	iron ion binding	5	2.77778	0.0486841	EGLN1, SCD, ALOX5, CYP3A4, XDH	180	145	18967	3.63352	1	0.267535	0.24251
CC	phosphatidylinositol 3-kinase complex, class IA	4	2.22222	5.17987e-05	PIK3CA, PIK3CB, PIK3R1, PIK3CG	180	9	20647	50.9802	0.0169997	0.000857269	0.000720002
MF	insulin receptor substrate binding	4	2.22222	0.0002205	PIK3CA, INSR, PIK3CB, PIK3R1	180	13	18967	32.4222	0.12142	0.00405169	0.0036727
MF	oxidoreductase activity, acting on single donors with incorporation of molecular oxygen, incorporation of two atoms of oxygen	4	2.22222	0.000278691	ALOX5, PTGS2, IDO1, PTGS1	180	14	18967	30.1063	0.150931	0.00496577	0.00450129
MF	CXCR chemokine receptor binding	4	2.22222	0.000345951	CXCL10, CXCL11, CXCL8, CXCL2	180	15	18967	28.0993	0.18381	0.00581197	0.00526834
MF	interleukin-1 receptor binding	4	2.22222	0.000345951	IL1A, IL1B, TLR9, IRAK4	180	15	18967	28.0993	0.18381	0.00581197	0.00526834
MF	phosphatidylinositol kinase activity	4	2.22222	0.000422837	PIK3CA, PIK3CB, PIK3R1, PIK3CG	180	16	18967	26.3431	0.219841	0.00690634	0.00626034
CC	phosphatidylinositol 3-kinase complex	4	2.22222	0.000874011	PIK3CA, PIK3CB, PIK3R1, PIK3CG	180	22	20647	20.8556	0.251305	0.00933218	0.0078379
CC	serine-type endopeptidase complex	4	2.22222	0.000874011	THBD, PLAU, F2, F3	180	22	20647	20.8556	0.251305	0.00933218	0.0078379
MF	RNA polymerase II core promoter sequence-specific DNA binding	4	2.22222	0.000969991	CEBPB, STAT1, FOS, RELA	180	21	18967	20.0709	0.434283	0.0139111	0.0126099
CC	endosome lumen	4	2.22222	0.000998734	APP, PRF1, CTSD, INS	180	23	20647	19.9488	0.281612	0.0103307	0.0086765
BP	vascular endothelial growth factor production	4	2.22222	2.60975e-05	IL6, IL1B, HIF1A, TNF	180	7	19453	61.7556	0.0719466	0.000491045	0.000425973
BP	regulation of early endosome to late endosome transport	4	2.22222	4.14731e-05	MAP2K1, SRC, MAPK1, MAPK3	180	8	19453	54.0361	0.111888	0.00073218	0.000635153
BP	negative regulation of lipid storage	4	2.22222	6.17884e-05	NFKBIA, CRP, IL6, TNF	180	9	19453	48.0321	0.162038	0.000998388	0.000866084
BP	regulation of establishment of endothelial barrier	4	2.22222	6.17884e-05	IKBKB, ROCK1, IL1B, TNF	180	9	19453	48.0321	0.162038	0.000998388	0.000866084
BP	regulation of stress-activated MAPK cascade	4	2.22222	8.76715e-05	MAP2K1, GSTP1, MAPK1, MAPK3	180	10	19453	43.2289	0.221853	0.00133158	0.00115512
BP	neutrophil mediated immunity	4	2.22222	0.000119733	IL6, ADAM17, ACE, IRAK4	180	11	19453	39.299	0.290061	0.00169522	0.00147058
BP	response to molecule of bacterial origin	4	2.22222	0.000119733	IL10, CXCL8, TLR9, CXCL2	180	11	19453	39.299	0.290061	0.00169522	0.00147058
BP	positive regulation of prostaglandin secretion	4	2.22222	0.000158564	P2RX7, IL1A, IL1B, PTGES	180	12	19453	36.0241	0.364718	0.00216982	0.00188228
BP	protein transmembrane transport	4	2.22222	0.000158564	EDNRA, EDNRB, PRF1, MCL1	180	12	19453	36.0241	0.364718	0.00216982	0.00188228
BP	positive regulation of chemokine (C-X-C motif) ligand 2 production	4	2.22222	0.000158564	TGFB1, MIF, TNF, TLR4	180	12	19453	36.0241	0.364718	0.00216982	0.00188228
BP	positive regulation of receptor activity	4	2.22222	0.000158564	IL10, ITGB1, IFNG, HIF1A	180	12	19453	36.0241	0.364718	0.00216982	0.00188228
BP	leukocyte migration involved in inflammatory response	4	2.22222	0.000204739	ALOX5, SELE, TNF, ELANE	180	13	19453	33.253	0.44335	0.00268603	0.00233008
MF	phospholipase binding	4	2.22222	0.00127384	SRC, BTK, FYN, SELE	180	23	18967	18.3256	0.526793	0.0162121	0.0146957
MF	insulin receptor binding	4	2.22222	0.00127384	APP, SRC, PIK3R1, INS	180	23	18967	18.3256	0.526793	0.0162121	0.0146957
BP	cellular response to fluid shear stress	4	2.22222	0.000258816	SRC, MMP2, HAS2, PTGS2	180	14	19453	30.8778	0.523157	0.00325019	0.00281948
BP	response to yeast	4	2.22222	0.000258816	APP, CALCA, MPO, ELANE	180	14	19453	30.8778	0.523157	0.00325019	0.00281948
BP	positive regulation of glycogen biosynthetic process	4	2.22222	0.000321334	INSR, AKT1, GCK, INS	180	15	19453	28.8193	0.601276	0.00389414	0.0033781
BP	positive regulation of fibroblast migration	4	2.22222	0.000321334	ITGB1, TGFB1, AKT1, PTK2	180	15	19453	28.8193	0.601276	0.00389414	0.0033781
BP	sphingosine-1-phosphate signaling pathway	4	2.22222	0.000321334	AKT1, RAC1, PIK3CB, PIK3CG	180	15	19453	28.8193	0.601276	0.00389414	0.0033781
BP	striated muscle cell differentiation	4	2.22222	0.000392818	CHUK, CASP3, AKT1, MAPK14	180	16	19453	27.0181	0.675046	0.00453008	0.00392976
BP	negative regulation of bone resorption	4	2.22222	0.000473774	P2RX7, IL6, CALCA, CD38	180	17	19453	25.4288	0.742256	0.00533462	0.00462769
BP	positive regulation of membrane protein ectodomain proteolysis	4	2.22222	0.000564693	APP, IFNG, IL1B, TNF	180	18	19453	24.016	0.801317	0.00621162	0.00538847
BP	negative regulation of lipid catabolic process	4	2.22222	0.000564693	ALK, IL1B, TNF, INS	180	18	19453	24.016	0.801317	0.00621162	0.00538847
BP	ectopic germ cell programmed cell death	4	2.22222	0.000564693	IL1A, IL1B, BCL2L1, SOD1	180	18	19453	24.016	0.801317	0.00621162	0.00538847
BP	response to vitamin D	4	2.22222	0.00066605	CXCL10, TGFB1, SPP1, PTGS2	180	19	19453	22.752	0.851357	0.00724298	0.00628316
BP	fibrinolysis	4	2.22222	0.00066605	PLAU, SERPINE1, PLAT, F2	180	19	19453	22.752	0.851357	0.00724298	0.00628316
BP	prostaglandin biosynthetic process	4	2.22222	0.000778307	MIF, PTGS2, PTGES, PTGS1	180	20	19453	21.6144	0.892213	0.00824428	0.00715177
BP	positive regulation of macrophage chemotaxis	4	2.22222	0.000778307	C5AR1, MAPK1, PTK2, MAPK3	180	20	19453	21.6144	0.892213	0.00824428	0.00715177
BP	positive regulation of cyclin-dependent protein serine/threonine kinase activity	4	2.22222	0.000778307	ADAM17, SRC, AKT1, EGFR	180	20	19453	21.6144	0.892213	0.00824428	0.00715177
BP	positive regulation of NLRP3 inflammasome complex assembly	4	2.22222	0.000778307	MAPK8, BTK, PRKD1, TLR4	180	20	19453	21.6144	0.892213	0.00824428	0.00715177
BP	cellular response to peptide hormone stimulus	4	2.22222	0.000778307	SRC, APEX1, CAV1, MDM2	180	20	19453	21.6144	0.892213	0.00824428	0.00715177
BP	cellular response to ATP	4	2.22222	0.000778307	P2RX7, PTGS2, HSP90B1, SOD1	180	20	19453	21.6144	0.892213	0.00824428	0.00715177
BP	prostaglandin metabolic process	4	2.22222	0.000901906	HPGD, GSTP1, AKR1B1, PTGES	180	21	19453	20.5852	0.924341	0.00911467	0.00790682
BP	cellular protein metabolic process	4	2.22222	0.000901906	MMP13, MMP1, MMP2, CTSG	180	21	19453	20.5852	0.924341	0.00911467	0.00790682
BP	smooth muscle contraction	4	2.22222	0.00103728	EDNRA, CALCA, ROCK1, MYLK	180	22	19453	19.6495	0.948655	0.0102651	0.0089048
BP	positive regulation of beta-amyloid formation	4	2.22222	0.00103728	IFNG, CASP3, TNF, RELA	180	22	19453	19.6495	0.948655	0.0102651	0.0089048
BP	positive regulation of smooth muscle cell migration	4	2.22222	0.00118484	SRC, BCL2, HAS2, TLR4	180	23	19453	18.7952	0.966353	0.011526	0.00999859
BP	face development	4	2.22222	0.00118484	MAP2K1, EDNRA, MAPK1, MAPK3	180	23	19453	18.7952	0.966353	0.011526	0.00999859
BP	release of cytochrome c from mitochondria	4	2.22222	0.00134499	BCL2, TP53, BCL2L1, MCL1	180	24	19453	18.012	0.978733	0.0125708	0.010905
BP	negative regulation of reactive oxygen species metabolic process	4	2.22222	0.00134499	MMP3, BCL2, HIF1A, TP53	180	24	19453	18.012	0.978733	0.0125708	0.010905
BP	regulation of sequence-specific DNA binding transcription factor activity	4	2.22222	0.00134499	MAPK10, MAPK8, HMOX1, MAPK3	180	24	19453	18.012	0.978733	0.0125708	0.010905
BP	negative regulation of interleukin-10 production	4	2.22222	0.00151812	IL23A, BTK, MMP8, IDO1	180	25	19453	17.2916	0.98705	0.0140968	0.0122287
BP	cellular response to platelet-derived growth factor stimulus	4	2.22222	0.00151812	SRC, HAS2, FYN, TLR4	180	25	19453	17.2916	0.98705	0.0140968	0.0122287
BP	decidualization	4	2.22222	0.00170459	PARP1, SPP1, PTGS2, CTSB	180	26	19453	16.6265	0.992411	0.0154758	0.013425
BP	positive regulation of osteoclast differentiation	4	2.22222	0.00190478	IFNG, IL23A, FOS, TNF	180	27	19453	16.0107	0.995724	0.0169709	0.014722
BP	muscle cell cellular homeostasis	4	2.22222	0.00190478	TGFB1, CAV1, HIF1A, SOD1	180	27	19453	16.0107	0.995724	0.0169709	0.014722
BP	regulation of blood vessel diameter	4	2.22222	0.00211902	ACE2, ACE, ROCK1, NOS3	180	28	19453	15.4389	0.997686	0.0185333	0.0160774
BP	positive regulation of histone acetylation	4	2.22222	0.00211902	APP, TGFB1, IL1B, MAPK3	180	28	19453	15.4389	0.997686	0.0185333	0.0160774
BP	positive regulation of receptor internalization	4	2.22222	0.00211902	EGF, INSR, SELE, VEGFA	180	28	19453	15.4389	0.997686	0.0185333	0.0160774
BP	cellular glucose homeostasis	4	2.22222	0.00211902	PIK3R1, HIF1A, SIRT1, GCK	180	28	19453	15.4389	0.997686	0.0185333	0.0160774
BP	response to amino acid	4	2.22222	0.00211902	CHUK, CASP3, BCL2, RELA	180	28	19453	15.4389	0.997686	0.0185333	0.0160774
BP	interferon-gamma-mediated signaling pathway	4	2.22222	0.00211902	IFNG, STAT1, TYK2, TP53	180	28	19453	15.4389	0.997686	0.0185333	0.0160774
BP	positive regulation of peptidyl-threonine phosphorylation	4	2.22222	0.002591	APP, TGFB1, EGF, MAPK1	180	30	19453	14.4096	0.999402	0.0215414	0.0186868
BP	endothelial cell proliferation	4	2.22222	0.002591	CALCA, CAV1, HMOX1, PIK3CB	180	30	19453	14.4096	0.999402	0.0215414	0.0186868
BP	positive regulation of extrinsic apoptotic signaling pathway	4	2.22222	0.002591	PTPRC, CAV1, TNF, TLR4	180	30	19453	14.4096	0.999402	0.0215414	0.0186868
BP	thyroid gland development	4	2.22222	0.00284936	MAP2K1, EDNRA, MAPK1, MAPK3	180	31	19453	13.9448	0.999715	0.0234172	0.020314
BP	negative regulation of blood pressure	4	2.22222	0.00284936	CALCA, NOS2, NOS3, PPARA	180	31	19453	13.9448	0.999715	0.0234172	0.020314
BP	endodermal cell differentiation	4	2.22222	0.00284936	MAP2K1, MMP2, MMP8, MMP9	180	31	19453	13.9448	0.999715	0.0234172	0.020314
BP	positive regulation of lamellipodium assembly	4	2.22222	0.00312304	CDC42, PIK3CA, RAC1, PIK3R1	180	32	19453	13.509	0.99987	0.0251602	0.0218261
BP	positive regulation of vasoconstriction	4	2.22222	0.00312304	ACE, CAV1, CD38, PTGS2	180	32	19453	13.509	0.99987	0.0251602	0.0218261
BP	negative regulation of osteoclast differentiation	4	2.22222	0.00341231	IL4, CALCA, PIK3R1, TLR4	180	33	19453	13.0997	0.999943	0.0272604	0.0236479
BP	negative regulation of smooth muscle cell proliferation	4	2.22222	0.00341231	ACE2, IFNG, NOS3, HMOX1	180	33	19453	13.0997	0.999943	0.0272604	0.0236479
BP	sprouting angiogenesis	4	2.22222	0.00371746	CDC42, TGFB1, FLT4, VEGFA	180	34	19453	12.7144	0.999976	0.0289699	0.0251309
BP	positive regulation of erythrocyte differentiation	4	2.22222	0.00403875	STAT1, STAT3, MAPK14, HIF1A	180	35	19453	12.3511	0.999991	0.0312184	0.0270814
BP	activation of protein kinase activity	4	2.22222	0.00403875	CALCA, RIPK3, INSR, VEGFA	180	35	19453	12.3511	0.999991	0.0312184	0.0270814
BP	endothelial cell migration	4	2.22222	0.00437641	DPP4, CALCA, PIK3CA, NOS3	180	36	19453	12.008	0.999996	0.0329163	0.0285543
BP	aortic valve morphogenesis	4	2.22222	0.00437641	ADAMTS5, TGFB1, ROCK1, NOS3	180	36	19453	12.008	0.999996	0.0329163	0.0285543
MF	ephrin receptor binding	4	2.22222	0.0030592	APP, SRC, FYN, PIK3CG	180	31	18967	13.5964	0.834454	0.0333113	0.0301955
BP	negative regulation of extrinsic apoptotic signaling pathway	4	2.22222	0.0047307	IL4, SRC, GSTP1, RELA	180	37	19453	11.6835	0.999999	0.0353258	0.0306446
BP	cellular response to nerve growth factor stimulus	4	2.22222	0.00510184	APP, CALCA, PARP1, AKT1	180	38	19453	11.376	1	0.0377035	0.0327071
BP	placenta development	4	2.22222	0.00510184	MME, MAPK14, PTK2, SOD1	180	38	19453	11.376	1	0.0377035	0.0327071
BP	protein maturation	4	2.22222	0.00589552	IKBKB, CASP3, CASP1, GZMB	180	40	19453	10.8072	1	0.0424715	0.0368433
BP	blood vessel remodeling	4	2.22222	0.00589552	EDNRA, ACE, NOS3, MDM2	180	40	19453	10.8072	1	0.0424715	0.0368433
BP	T cell differentiation in thymus	4	2.22222	0.00589552	ADAM17, RIPK3, BCL2, TP53	180	40	19453	10.8072	1	0.0424715	0.0368433
BP	cellular response to ionizing radiation	4	2.22222	0.00631847	TGFB1, MAPK14, SIRT1, TP53	180	41	19453	10.5436	1	0.0445094	0.0386112
BP	lung alveolus development	4	2.22222	0.00631847	MMP12, TGFB1, ACE, FLT4	180	41	19453	10.5436	1	0.0445094	0.0386112
BP	cell adhesion mediated by integrin	4	2.22222	0.00631847	ITGB1, ADAM17, ITGAL, ICAM1	180	41	19453	10.5436	1	0.0445094	0.0386112
BP	lactation	4	2.22222	0.00721753	CAV1, HIF1A, XDH, VEGFA	180	43	19453	10.0532	1	0.0498602	0.0432529
BP	monocyte chemotaxis	4	2.22222	0.00818859	IL6, CALCA, CCL2, CTSG	180	45	19453	9.60642	1	0.0553649	0.0480281
BP	stimulatory C-type lectin receptor signaling pathway	4	2.22222	0.00870151	IKBKB, SRC, FYN, PSMB8	180	46	19453	9.39758	1	0.058556	0.0507963
BP	positive regulation of substrate adhesion-dependent cell spreading	4	2.22222	0.00870151	CDC42, ILK, HAS2, RAC1	180	46	19453	9.39758	1	0.058556	0.0507963
BP	cell motility	4	2.22222	0.00923288	ADAM17, MAP2K1, RAC1, PTK2	180	47	19453	9.19764	1	0.0614559	0.053312
BP	energy homeostasis	4	2.22222	0.00978284	ALK, PIK3CA, STAT3, SIRT1	180	48	19453	9.00602	1	0.0644675	0.0559245
BP	cellular response to amino acid starvation	4	2.22222	0.00978284	MAPK8, MAPK1, PRKD1, MAPK3	180	48	19453	9.00602	1	0.0644675	0.0559245
BP	positive regulation of cell division	4	2.22222	0.0103515	IL1A, TGFB1, IL1B, VEGFA	180	49	19453	8.82222	1	0.0676655	0.0586987
BP	positive chemotaxis	4	2.22222	0.010939	CXCL10, FPR2, MIF, VEGFA	180	50	19453	8.64578	1	0.0698337	0.0605795
BP	visual learning	4	2.22222	0.010939	ITGB1, APP, HMGCR, HIF1A	180	50	19453	8.64578	1	0.0698337	0.0605795
BP	platelet aggregation	4	2.22222	0.010939	HSPB1, ILK, PIK3CB, PIK3CG	180	50	19453	8.64578	1	0.0698337	0.0605795
BP	positive regulation of protein secretion	4	2.22222	0.010939	P2RX7, IL1A, TGFB1, INS	180	50	19453	8.64578	1	0.0698337	0.0605795
BP	positive regulation of G1/S transition of mitotic cell cycle	4	2.22222	0.0115454	ADAM17, APEX1, AKT1, EGFR	180	51	19453	8.47625	1	0.0731834	0.0634853
BP	outflow tract morphogenesis	4	2.22222	0.0115454	JUN, ILK, HIF1A, VEGFA	180	51	19453	8.47625	1	0.0731834	0.0634853
BP	cellular response to heat	4	2.22222	0.0121708	IL1A, CXCL10, HMOX1, PTGS2	180	52	19453	8.31325	1	0.0760013	0.0659298
BP	response to peptide hormone	4	2.22222	0.0128154	COL1A1, STAT1, STAT3, STAT6	180	53	19453	8.15639	1	0.0795619	0.0690185
BP	response to nutrient levels	4	2.22222	0.0128154	ACE, SRC, TNF, SOD1	180	53	19453	8.15639	1	0.0795619	0.0690185
BP	cognition	4	2.22222	0.0134791	APP, C5AR1, TNF, INS	180	54	19453	8.00535	1	0.0821969	0.0713044
BP	phosphatidylinositol phosphorylation	4	2.22222	0.0141622	PIK3CA, PIK3CB, PIK3R1, PIK3CG	180	55	19453	7.8598	1	0.0858503	0.0744736
BP	heterophilic cell-cell adhesion via plasma membrane cell adhesion molecules	4	2.22222	0.0141622	VCAM1, ITGAL, SELE, ICAM1	180	55	19453	7.8598	1	0.0858503	0.0744736
BP	positive regulation of fibroblast proliferation	4	2.22222	0.0148645	JUN, TGFB1, MIF, EGFR	180	56	19453	7.71944	1	0.0887528	0.0769915
BP	negative regulation of neuron death	4	2.22222	0.0163276	APP, AKT1, PPARA, SIRT1	180	58	19453	7.45326	1	0.0958867	0.08318
BP	learning	4	2.22222	0.0170883	APP, INSR, FYN, PTGS2	180	59	19453	7.32693	1	0.0991878	0.0860437
BP	regulation of cell adhesion	4	2.22222	0.0178686	CXCL8, ROCK1, PLAU, PTK2	180	60	19453	7.20481	1	0.10134	0.0879106
BP	substrate adhesion-dependent cell spreading	4	2.22222	0.0178686	SRC, ILK, RAC1, PIK3R1	180	60	19453	7.20481	1	0.10134	0.0879106
BP	positive regulation of cell adhesion	4	2.22222	0.0186685	ERBB2, PRKCA, TNF, VEGFA	180	61	19453	7.0867	1	0.102226	0.088679
BP	cellular response to UV	4	2.22222	0.0186685	PARP1, PIK3R1, PTGS2, TP53	180	61	19453	7.0867	1	0.102226	0.088679
BP	negative regulation of fat cell differentiation	4	2.22222	0.0186685	IL6, TGFB1, SIRT1, TNF	180	61	19453	7.0867	1	0.102226	0.088679
BP	vasculogenesis	4	2.22222	0.020327	TGFB1, CAV1, HAS2, VEGFA	180	63	19453	6.86173	1	0.110015	0.0954358
BP	response to estrogen	4	2.22222	0.020327	MME, CAV1, MMP2, HMOX1	180	63	19453	6.86173	1	0.110015	0.0954358
BP	regulation of mRNA stability	4	2.22222	0.0220642	APEX1, AKT1, PRKCA, PSMB8	180	65	19453	6.6506	1	0.117511	0.101939
BP	cellular iron ion homeostasis	4	2.22222	0.0220642	EGLN1, HMOX1, HIF1A, SOD1	180	65	19453	6.6506	1	0.117511	0.101939
BP	regulation of circadian rhythm	4	2.22222	0.0229623	MAPK10, MAPK8, PPARA, PPP1CA	180	66	19453	6.54983	1	0.122067	0.105891
BP	negative regulation of protein kinase B signaling	4	2.22222	0.0248174	PIK3CB, PPARA, SIRT1, XDH	180	68	19453	6.35719	1	0.129996	0.112769
BP	negative regulation of protein kinase activity	4	2.22222	0.0248174	PTPRC, GSTP1, HSPB1, AKT1	180	68	19453	6.35719	1	0.129996	0.112769
BP	cellular response to transforming growth factor beta stimulus	4	2.22222	0.026751	COL1A1, TGFB1, CAV1, FYN	180	70	19453	6.17556	1	0.137246	0.119058
BP	negative regulation of interleukin-6 production	4	2.22222	0.0277472	IL10, TLR9, TNF, TLR4	180	71	19453	6.08858	1	0.138979	0.120562
BP	positive regulation of osteoblast differentiation	4	2.22222	0.0330212	IL6, CEBPB, ILK, PRKD1	180	76	19453	5.68801	1	0.161161	0.139805
BP	cellular response to starvation	4	2.22222	0.0364181	CAV1, ALB, PPARA, SIRT1	180	79	19453	5.47201	1	0.169635	0.147155
BP	hematopoietic progenitor cell differentiation	4	2.22222	0.0375889	TGFB1, PTPRC, FLT4, TP53	180	80	19453	5.40361	1	0.173394	0.150416
BP	negative regulation of tumor necrosis factor production	4	2.22222	0.0387788	IL10, IL4, GSTP1, TLR4	180	81	19453	5.3369	1	0.178594	0.154927
BP	lung development	4	2.22222	0.0412156	MME, NOS3, PPP1CA, VEGFA	180	83	19453	5.2083	1	0.187702	0.162828
BP	mitochondrion organization	4	2.22222	0.0437279	P2RX7, EDNRA, PARP1, NOS3	180	85	19453	5.08575	1	0.197258	0.171118
BP	defense response	4	2.22222	0.0437279	STAT1, STAT3, STAT6, MPO	180	85	19453	5.08575	1	0.197258	0.171118
MF	chemoattractant activity	4	2.22222	0.00632001	CXCL10, APP, MIF, VEGFA	180	40	18967	10.5372	0.975805	0.0629859	0.0570944
BP	response to endoplasmic reticulum stress	4	2.22222	0.0476366	CEBPB, CXCL8, PIK3R1, HSP90B1	180	88	19453	4.91237	1	0.207573	0.180066
BP	memory	4	2.22222	0.0489765	APP, CEBPB, INSR, PTGS2	180	89	19453	4.85718	1	0.212876	0.184667
MF	NADP binding	4	2.22222	0.00773328	DHFR, NOS2, NOS3, HMGCR	180	43	18967	9.80207	0.989507	0.0745437	0.0675711
CC	transcriptional repressor complex	4	2.22222	0.0166734	JUN, MDM2, TP53, ELANE	180	62	20647	7.40036	0.996172	0.0935408	0.0785629
MF	serine-type peptidase activity	4	2.22222	0.0182604	DPP4, CFD, GZMB, CTSG	180	59	18967	7.14388	0.99998	0.15132	0.137166
MF	copper ion binding	4	2.22222	0.019091	IL1A, ALB, TP53, SOD1	180	60	18967	7.02481	0.999988	0.151696	0.137507
CC	basal plasma membrane	4	2.22222	0.0221097	ACE, ERBB3, ERBB2, EGFR	180	69	20647	6.6496	0.999389	0.118037	0.0991371
MF	receptor agonist activity	4	2.22222	0.0245088	APP, EGF, CTSG, VEGFA	180	66	18967	6.3862	1	0.177916	0.161274
MF	flavin adenine dinucleotide binding	4	2.22222	0.0264801	NOS2, MAOA, NOS3, XDH	180	68	18967	6.19837	1	0.187408	0.169878
MF	collagen binding	4	2.22222	0.0264801	MMP12, MMP13, MMP9, CTSB	180	68	18967	6.19837	1	0.187408	0.169878
MF	p53 binding	4	2.22222	0.0317687	MDM2, HIF1A, SIRT1, TP53	180	73	18967	5.77382	1	0.207556	0.188141
CC	neuromuscular junction	4	2.22222	0.0388553	P2RX7, ITGB1, APP, ERBB2	180	86	20647	5.33514	0.999998	0.191957	0.16122
MF	chromatin DNA binding	4	2.22222	0.0465284	CEBPB, APEX1, STAT3, RELA	180	85	18967	4.95869	1	0.263064	0.238458
CC	serine protease inhibitor complex	3	1.66667	0.000734712	PLAU, SERPINE1, PLAT	180	5	20647	68.8233	0.215947	0.00885371	0.00743605
MF	phosphatidylinositol 3-kinase activity	3	1.66667	0.000869306	PIK3CA, PIK3CB, PIK3CG	180	5	18967	63.2233	0.399807	0.0131065	0.0118805
MF	ErbB-3 class receptor binding	3	1.66667	0.000869306	ERBB3, ERBB2, PIK3R1	180	5	18967	63.2233	0.399807	0.0131065	0.0118805
MF	BH3 domain binding	3	1.66667	0.00129586	BCL2, BCL2L1, MCL1	180	6	18967	52.6861	0.532878	0.0162121	0.0146957
MF	1-phosphatidylinositol-4-phosphate 3-kinase activity	3	1.66667	0.00180296	PIK3CA, PIK3CB, PIK3CG	180	7	18967	45.1595	0.653298	0.0212028	0.0192195
MF	phosphatidylinositol-4,5-bisphosphate 3-kinase activity	3	1.66667	0.00180296	PIK3CA, PIK3CB, PIK3CG	180	7	18967	45.1595	0.653298	0.0212028	0.0192195
CC	caspase complex	3	1.66667	0.00202222	CASP6, CASP3, CASP1	180	8	20647	43.0146	0.488307	0.0178016	0.0149512
CC	bleb	3	1.66667	0.00258519	P2RX7, PTPRC, ROCK1	180	9	20647	38.2352	0.575484	0.021941	0.0184278
MF	phosphatidylinositol-3,4-bisphosphate 5-kinase activity	3	1.66667	0.0030526	PIK3CA, PIK3CB, PIK3CG	180	9	18967	35.1241	0.833808	0.0333113	0.0301955
CC	nuclear envelope lumen	3	1.66667	0.00321311	APP, ALOX5, PTGES	180	10	20647	34.4117	0.655359	0.0253223	0.0212677
MF	1-phosphatidylinositol-3-kinase activity	3	1.66667	0.00379213	PIK3CA, PIK3CB, PIK3CG	180	10	18967	31.6117	0.892494	0.0391188	0.0354597
MF	growth factor receptor binding	3	1.66667	0.00379213	APP, SRC, FYN	180	10	18967	31.6117	0.892494	0.0391188	0.0354597
MF	phospholipase activator activity	3	1.66667	0.00460616	SRC, BTK, FYN	180	11	18967	28.7379	0.933467	0.0466969	0.042329
BP	positive regulation of calcidiol 1-monooxygenase activity	3	1.66667	0.000251073	IFNG, IL1B, TNF	180	3	19453	108.072	0.512474	0.00319142	0.0027685
BP	substance P catabolic process	3	1.66667	0.000251073	ACE, MME, ECE1	180	3	19453	108.072	0.512474	0.00319142	0.0027685
BP	positive regulation of cyclase activity	3	1.66667	0.000251073	MAPK8, MAPK14, MAPK3	180	3	19453	108.072	0.512474	0.00319142	0.0027685
BP	response to carbon monoxide	3	1.66667	0.000251073	IL10, KCNMA1, SOD1	180	3	19453	108.072	0.512474	0.00319142	0.0027685
BP	regulation of Golgi inheritance	3	1.66667	0.000499103	MAP2K1, MAPK1, MAPK3	180	4	19453	81.0542	0.760281	0.00557591	0.00483701
BP	hormone catabolic process	3	1.66667	0.000499103	ACE, MME, ECE1	180	4	19453	81.0542	0.760281	0.00557591	0.00483701
BP	positive regulation of endothelial cell chemotaxis by VEGF-activated vascular endothelial growth factor receptor signaling pathway	3	1.66667	0.000826799	HSPB1, PRKD1, VEGFA	180	5	19453	64.8433	0.906187	0.00847543	0.00735229
BP	membrane to membrane docking	3	1.66667	0.000826799	VCAM1, ROCK1, ICAM1	180	5	19453	64.8433	0.906187	0.00847543	0.00735229
BP	prostaglandin secretion	3	1.66667	0.000826799	P2RX7, NOS2, PTGS2	180	5	19453	64.8433	0.906187	0.00847543	0.00735229
BP	positive regulation of mononuclear cell migration	3	1.66667	0.000826799	IL4, TGFB1, TNF	180	5	19453	64.8433	0.906187	0.00847543	0.00735229
BP	connective tissue replacement involved in inflammatory response wound healing	3	1.66667	0.000826799	IL1A, TGFB1, HIF1A	180	5	19453	64.8433	0.906187	0.00847543	0.00735229
BP	negative regulation of myosin-light-chain-phosphatase activity	3	1.66667	0.000826799	IKBKB, ROCK1, TNF	180	5	19453	64.8433	0.906187	0.00847543	0.00735229
BP	positive regulation of fever generation	3	1.66667	0.000826799	IL1B, PTGS2, TNF	180	5	19453	64.8433	0.906187	0.00847543	0.00735229
BP	caveolin-mediated endocytosis	3	1.66667	0.000826799	CAV1, MAPK1, MAPK3	180	5	19453	64.8433	0.906187	0.00847543	0.00735229
BP	negative regulation of bicellular tight junction assembly	3	1.66667	0.00123269	IKBKB, ROCK1, TNF	180	6	19453	54.0361	0.970663	0.011791	0.0102284
BP	cellular response to interleukin-17	3	1.66667	0.00123269	CXCL10, IL1B, STAT3	180	6	19453	54.0361	0.970663	0.011791	0.0102284
BP	positive regulation of transcription from RNA polymerase II promoter in response to hypoxia	3	1.66667	0.00123269	HIF1A, TP53, VEGFA	180	6	19453	54.0361	0.970663	0.011791	0.0102284
BP	positive regulation of killing of cells of other organism	3	1.66667	0.00123269	IFNG, NOS2, PRF1	180	6	19453	54.0361	0.970663	0.011791	0.0102284
MF	insulin-like growth factor receptor binding	3	1.66667	0.00974353	INSR, PIK3R1, INS	180	16	18967	19.7573	0.996809	0.0909396	0.0824333
BP	positive regulation of oxidative stress-induced neuron death	3	1.66667	0.00123269	APP, TNF, TLR4	180	6	19453	54.0361	0.970663	0.011791	0.0102284
BP	bradykinin catabolic process	3	1.66667	0.00171533	ACE, MME, ECE1	180	7	19453	46.3167	0.992641	0.0154758	0.013425
BP	regulation of transmembrane transporter activity	3	1.66667	0.00171533	ACE2, BCL2, INS	180	7	19453	46.3167	0.992641	0.0154758	0.013425
BP	receptor-mediated virion attachment to host cell	3	1.66667	0.00171533	DPP4, ACE2, ICAM1	180	7	19453	46.3167	0.992641	0.0154758	0.013425
BP	trachea formation	3	1.66667	0.00171533	MAP2K1, MAPK1, MAPK3	180	7	19453	46.3167	0.992641	0.0154758	0.013425
BP	negative regulation of vascular wound healing	3	1.66667	0.00227328	ALOX5, SERPINE1, TNF	180	8	19453	40.5271	0.998513	0.0191223	0.0165883
BP	negative regulation of platelet activation	3	1.66667	0.00227328	THBD, NOS3, F2	180	8	19453	40.5271	0.998513	0.0191223	0.0165883
BP	activated T cell proliferation	3	1.66667	0.00227328	IL2RA, FYN, IL2	180	8	19453	40.5271	0.998513	0.0191223	0.0165883
BP	negative regulation of acute inflammatory response	3	1.66667	0.00227328	IL4, GSTP1, INS	180	8	19453	40.5271	0.998513	0.0191223	0.0165883
BP	positive regulation of interleukin-18 production	3	1.66667	0.00227328	CASP1, TLR9, TNF	180	8	19453	40.5271	0.998513	0.0191223	0.0165883
BP	negative regulation of receptor activity	3	1.66667	0.00227328	ACE2, PPARA, TNF	180	8	19453	40.5271	0.998513	0.0191223	0.0165883
BP	positive regulation of necroptotic process	3	1.66667	0.00227328	RIPK3, PARP1, CASP6	180	8	19453	40.5271	0.998513	0.0191223	0.0165883
BP	ERBB2-EGFR signaling pathway	3	1.66667	0.00227328	EGF, ERBB2, EGFR	180	8	19453	40.5271	0.998513	0.0191223	0.0165883
BP	negative regulation of plasminogen activation	3	1.66667	0.00227328	PLAU, SERPINE1, PLAT	180	8	19453	40.5271	0.998513	0.0191223	0.0165883
BP	interleukin-2-mediated signaling pathway	3	1.66667	0.00227328	IL2RA, STAT3, IL2	180	8	19453	40.5271	0.998513	0.0191223	0.0165883
BP	regulation of lipid storage	3	1.66667	0.00227328	FTO, PPARA, SIRT1	180	8	19453	40.5271	0.998513	0.0191223	0.0165883
BP	response to fluid shear stress	3	1.66667	0.00227328	P2RX7, NOS3, AKT1	180	8	19453	40.5271	0.998513	0.0191223	0.0165883
BP	ovulation from ovarian follicle	3	1.66667	0.00290514	NOS3, MMP2, SIRT1	180	9	19453	36.0241	0.999757	0.0236042	0.0204763
BP	regulation of nitric-oxide synthase activity	3	1.66667	0.00290514	IL1A, IL1B, EGFR	180	9	19453	36.0241	0.999757	0.0236042	0.0204763
BP	negative regulation of biomineral tissue development	3	1.66667	0.00290514	TGFB1, ROCK1, NOS3	180	9	19453	36.0241	0.999757	0.0236042	0.0204763
BP	angiotensin maturation	3	1.66667	0.00290514	ACE2, ACE, CTSG	180	9	19453	36.0241	0.999757	0.0236042	0.0204763
BP	I-kappaB phosphorylation	3	1.66667	0.0036095	CHUK, TLR9, TLR4	180	10	19453	32.4217	0.999968	0.0282054	0.0244677
BP	nucleotide-binding oligomerization domain containing 2 signaling pathway	3	1.66667	0.0036095	NFKBIA, TLR4, RELA	180	10	19453	32.4217	0.999968	0.0282054	0.0244677
BP	smooth muscle cell migration	3	1.66667	0.0036095	PLAU, BCL2, PLAT	180	10	19453	32.4217	0.999968	0.0282054	0.0244677
BP	mammary gland epithelial cell proliferation	3	1.66667	0.0036095	CEBPB, MAPK1, STAT6	180	10	19453	32.4217	0.999968	0.0282054	0.0244677
BP	JAK-STAT cascade involved in growth hormone signaling pathway	3	1.66667	0.0036095	STAT3, STAT6, TYK2	180	10	19453	32.4217	0.999968	0.0282054	0.0244677
BP	receptor-mediated endocytosis of virus by host cell	3	1.66667	0.0036095	DPP4, ACE2, CAV1	180	10	19453	32.4217	0.999968	0.0282054	0.0244677
BP	bleb assembly	3	1.66667	0.0036095	P2RX7, ROCK1, MYLK	180	10	19453	32.4217	0.999968	0.0282054	0.0244677
BP	positive regulation of T cell apoptotic process	3	1.66667	0.0036095	P2RX7, IDO1, ICAM1	180	10	19453	32.4217	0.999968	0.0282054	0.0244677
BP	Bergmann glial cell differentiation	3	1.66667	0.00438501	MAP2K1, MAPK1, MAPK3	180	11	19453	29.4742	0.999997	0.0329163	0.0285543
BP	negative regulation of motor neuron apoptotic process	3	1.66667	0.00438501	ERBB3, ROCK1, BCL2	180	11	19453	29.4742	0.999997	0.0329163	0.0285543
BP	positive regulation of isotype switching to IgG isotypes	3	1.66667	0.00438501	IL4, PTPRC, IL2	180	11	19453	29.4742	0.999997	0.0329163	0.0285543
BP	regulation of cytokine production involved in inflammatory response	3	1.66667	0.00438501	NOS2, ALOX5, MAPK14	180	11	19453	29.4742	0.999997	0.0329163	0.0285543
BP	cellular response to lipoteichoic acid	3	1.66667	0.00438501	MAPK14, TLR4, RELA	180	11	19453	29.4742	0.999997	0.0329163	0.0285543
BP	negative regulation of production of miRNAs involved in gene silencing by miRNA	3	1.66667	0.00438501	TGFB1, TNF, TP53	180	11	19453	29.4742	0.999997	0.0329163	0.0285543
BP	negative regulation of beta-amyloid clearance	3	1.66667	0.00438501	IFNG, HMGCR, TNF	180	11	19453	29.4742	0.999997	0.0329163	0.0285543
BP	neuron projection maintenance	3	1.66667	0.00523029	APP, INSR, INS	180	12	19453	27.0181	1	0.0382574	0.0331876
MF	bacterial-type RNA polymerase transcriptional activator activity, sequence-specific DNA binding	3	1.66667	0.0136299	PPARA, HIF1A, TP53	180	19	18967	16.6377	0.999683	0.123298	0.111765
MF	transmembrane receptor protein tyrosine kinase activator activity	3	1.66667	0.0136299	EGF, EGFR, VEGFA	180	19	18967	16.6377	0.999683	0.123298	0.111765
BP	regulation of biological quality	3	1.66667	0.00523029	MDM2, TNF, PTK2	180	12	19453	27.0181	1	0.0382574	0.0331876
BP	positive regulation of endothelial cell chemotaxis	3	1.66667	0.00523029	HSPB1, PRKD1, VEGFA	180	12	19453	27.0181	1	0.0382574	0.0331876
BP	positive regulation of positive chemotaxis	3	1.66667	0.00523029	CCR4, F3, VEGFA	180	12	19453	27.0181	1	0.0382574	0.0331876
BP	growth hormone receptor signaling pathway	3	1.66667	0.00614403	STAT3, PIK3R1, PTK2	180	13	19453	24.9397	1	0.0436028	0.0378247
BP	regulation of cell adhesion mediated by integrin	3	1.66667	0.00614403	PLAU, PTK2, PIK3CG	180	13	19453	24.9397	1	0.0436028	0.0378247
BP	positive regulation of vascular permeability	3	1.66667	0.00614403	TGFB1, CXCR2, VEGFA	180	13	19453	24.9397	1	0.0436028	0.0378247
BP	beta-amyloid clearance	3	1.66667	0.00614403	MME, INSR, C5AR1	180	13	19453	24.9397	1	0.0436028	0.0378247
BP	response to muramyl dipeptide	3	1.66667	0.00614403	NFKBIA, MAPK14, RELA	180	13	19453	24.9397	1	0.0436028	0.0378247
BP	wound healing, spreading of epidermal cells	3	1.66667	0.00614403	MMP12, ITGB1, ADAM17	180	13	19453	24.9397	1	0.0436028	0.0378247
BP	removal of superoxide radicals	3	1.66667	0.0071249	NOS3, MPO, SOD1	180	14	19453	23.1583	1	0.0493395	0.0428012
BP	positive regulation of leukocyte adhesion to vascular endothelial cell	3	1.66667	0.0071249	IL6, TNF, RELA	180	14	19453	23.1583	1	0.0493395	0.0428012
BP	digestive tract morphogenesis	3	1.66667	0.0071249	BCL2, HIF1A, EGFR	180	14	19453	23.1583	1	0.0493395	0.0428012
BP	negative regulation of macrophage derived foam cell differentiation	3	1.66667	0.0071249	NFKBIA, CRP, PPARA	180	14	19453	23.1583	1	0.0493395	0.0428012
BP	interleukin-6-mediated signaling pathway	3	1.66667	0.0071249	IL6, SRC, STAT3	180	14	19453	23.1583	1	0.0493395	0.0428012
BP	hepatocyte apoptotic process	3	1.66667	0.0071249	CASP6, PIK3CG, BCL2L1	180	14	19453	23.1583	1	0.0493395	0.0428012
BP	negative regulation of DNA damage response, signal transduction by p53 class mediator	3	1.66667	0.0081716	MDM2, MIF, SIRT1	180	15	19453	21.6144	1	0.0553649	0.0480281
BP	motor neuron apoptotic process	3	1.66667	0.0081716	ERBB3, ROCK1, BCL2	180	15	19453	21.6144	1	0.0553649	0.0480281
BP	positive regulation of heterotypic cell-cell adhesion	3	1.66667	0.0081716	IL10, IL1B, TNF	180	15	19453	21.6144	1	0.0553649	0.0480281
BP	positive regulation of tumor necrosis factor-mediated signaling pathway	3	1.66667	0.0081716	ADAM17, CASP1, MMP8	180	15	19453	21.6144	1	0.0553649	0.0480281
BP	positive regulation of granulocyte macrophage colony-stimulating factor production	3	1.66667	0.0081716	IL23A, IL1B, TLR9	180	15	19453	21.6144	1	0.0553649	0.0480281
BP	regulation of cellular response to stress	3	1.66667	0.0081716	BCL2, BCL2L1, MCL1	180	15	19453	21.6144	1	0.0553649	0.0480281
BP	T cell chemotaxis	3	1.66667	0.0081716	CXCL10, CXCL11, PIK3CG	180	15	19453	21.6144	1	0.0553649	0.0480281
BP	regulation of ossification	3	1.66667	0.00928286	MAPK1, MAPK14, MAPK3	180	16	19453	20.2635	1	0.0614559	0.053312
BP	macrophage chemotaxis	3	1.66667	0.00928286	EDNRB, MMP2, CCL2	180	16	19453	20.2635	1	0.0614559	0.053312
BP	replicative senescence	3	1.66667	0.00928286	MME, SERPINE1, TP53	180	16	19453	20.2635	1	0.0614559	0.053312
BP	positive regulation of brown fat cell differentiation	3	1.66667	0.00928286	MAPK14, PTGS2, INS	180	16	19453	20.2635	1	0.0614559	0.053312
BP	positive regulation of leukocyte migration	3	1.66667	0.00928286	PIK3R1, SELE, VEGFA	180	16	19453	20.2635	1	0.0614559	0.053312
BP	negative regulation of intrinsic apoptotic signaling pathway in response to DNA damage by p53 class mediator	3	1.66667	0.00928286	BCL2, MIF, SIRT1	180	16	19453	20.2635	1	0.0614559	0.053312
BP	axon regeneration	3	1.66667	0.0104574	DHFR, JUN, BCL2	180	17	19453	19.0716	1	0.0676655	0.0586987
BP	peptide hormone processing	3	1.66667	0.0104574	DPP4, ECE1, PLA2G7	180	17	19453	19.0716	1	0.0676655	0.0586987
BP	neutrophil activation	3	1.66667	0.0104574	CXCL8, CXCR2, CTSG	180	17	19453	19.0716	1	0.0676655	0.0586987
BP	response to iron ion	3	1.66667	0.0104574	MDM2, BCL2, HIF1A	180	17	19453	19.0716	1	0.0676655	0.0586987
BP	vascular endothelial growth factor signaling pathway	3	1.66667	0.0104574	PIK3CA, FLT4, VEGFA	180	17	19453	19.0716	1	0.0676655	0.0586987
BP	dendritic cell chemotaxis	3	1.66667	0.0104574	CXCR1, CXCR2, PIK3CG	180	17	19453	19.0716	1	0.0676655	0.0586987
BP	negative regulation of macroautophagy	3	1.66667	0.0104574	PIK3CA, HMOX1, AKT1	180	17	19453	19.0716	1	0.0676655	0.0586987
BP	apoptotic mitochondrial changes	3	1.66667	0.011694	AKT1, PIM2, BCL2L1	180	18	19453	18.012	1	0.0731834	0.0634853
BP	protein metabolic process	3	1.66667	0.011694	MMP1, MMP2, CTSG	180	18	19453	18.012	1	0.0731834	0.0634853
BP	regulation of receptor activity	3	1.66667	0.011694	APP, PLAU, SERPINE1	180	18	19453	18.012	1	0.0731834	0.0634853
BP	vasculature development	3	1.66667	0.011694	CALCA, PIK3CA, FLT4	180	18	19453	18.012	1	0.0731834	0.0634853
BP	response to steroid hormone	3	1.66667	0.011694	COL1A1, MDM2, SPP1	180	18	19453	18.012	1	0.0731834	0.0634853
BP	low-density lipoprotein particle remodeling	3	1.66667	0.011694	PLA2G2A, MPO, PLA2G7	180	18	19453	18.012	1	0.0731834	0.0634853
BP	embryonic heart tube development	3	1.66667	0.0129914	CDC42, EDNRA, ECE1	180	19	19453	17.064	1	0.0795619	0.0690185
BP	negative regulation of B cell proliferation	3	1.66667	0.0129914	IL10, CASP3, BTK	180	19	19453	17.064	1	0.0795619	0.0690185
BP	monocyte differentiation	3	1.66667	0.0129914	JUN, FASN, VEGFA	180	19	19453	17.064	1	0.0795619	0.0690185
BP	positive regulation of bone resorption	3	1.66667	0.0129914	SRC, SPP1, PRKCA	180	19	19453	17.064	1	0.0795619	0.0690185
BP	cellular response to extracellular stimulus	3	1.66667	0.0129914	P2RX7, PTPRC, FOS	180	19	19453	17.064	1	0.0795619	0.0690185
BP	epithelial cell apoptotic process	3	1.66667	0.0129914	CASP3, BCL2, HMOX1	180	19	19453	17.064	1	0.0795619	0.0690185
BP	regulation of sodium ion transport	3	1.66667	0.0129914	P2RX7, TGFB1, NOS3	180	19	19453	17.064	1	0.0795619	0.0690185
BP	positive regulation of histone deacetylation	3	1.66667	0.0143484	TGFB1, SIRT1, TP53	180	20	19453	16.2108	1	0.0858503	0.0744736
BP	positive regulation of DNA biosynthetic process	3	1.66667	0.0143484	SRC, TNF, VEGFA	180	20	19453	16.2108	1	0.0858503	0.0744736
BP	response to X-ray	3	1.66667	0.0143484	THBD, CASP3, TP53	180	20	19453	16.2108	1	0.0858503	0.0744736
BP	regulation of stress fiber assembly	3	1.66667	0.0143484	CDC42, ROCK1, RAC1	180	20	19453	16.2108	1	0.0858503	0.0744736
BP	embryonic placenta development	3	1.66667	0.0143484	CEBPB, HIF1A, EGFR	180	20	19453	16.2108	1	0.0858503	0.0744736
BP	response to light stimulus	3	1.66667	0.0143484	MAPK10, MAPK8, FOS	180	20	19453	16.2108	1	0.0858503	0.0744736
BP	regulation of vasoconstriction	3	1.66667	0.0143484	ACE2, ACE, ECE1	180	20	19453	16.2108	1	0.0858503	0.0744736
BP	positive regulation of protein export from nucleus	3	1.66667	0.0157638	IL1B, MDM2, PRKD1	180	21	19453	15.4389	1	0.0927665	0.0804734
MF	C-C chemokine receptor activity	3	1.66667	0.0196754	CXCR1, CXCR2, CCR4	180	23	18967	13.7442	0.999991	0.154255	0.139827
BP	hematopoietic stem cell differentiation	3	1.66667	0.0157638	ACE, BCL2, TP53	180	21	19453	15.4389	1	0.0927665	0.0804734
BP	establishment of endothelial barrier	3	1.66667	0.0157638	EDNRA, EDNRB, ICAM1	180	21	19453	15.4389	1	0.0927665	0.0804734
BP	Fc-gamma receptor signaling pathway involved in phagocytosis	3	1.66667	0.0157638	SRC, FYN, PTK2	180	21	19453	15.4389	1	0.0927665	0.0804734
BP	endocardial cushion morphogenesis	3	1.66667	0.0157638	ADAMTS5, NOS3, MDM2	180	21	19453	15.4389	1	0.0927665	0.0804734
BP	heart contraction	3	1.66667	0.0157638	CDC42, ACE, SOD1	180	21	19453	15.4389	1	0.0927665	0.0804734
BP	execution phase of apoptosis	3	1.66667	0.0172365	CASP6, CASP3, AKT1	180	22	19453	14.7371	1	0.0991878	0.0860437
MF	C-C chemokine binding	3	1.66667	0.0213327	CXCR1, CXCR2, CCR4	180	24	18967	13.1715	0.999997	0.162904	0.147667
MF	ubiquitin-like protein ligase binding	3	1.66667	0.0213327	CEBPB, JUN, STAT1	180	24	18967	13.1715	0.999997	0.162904	0.147667
BP	positive regulation of glial cell proliferation	3	1.66667	0.0172365	IL6, IL1B, TNF	180	22	19453	14.7371	1	0.0991878	0.0860437
BP	positive regulation of insulin receptor signaling pathway	3	1.66667	0.0172365	SRC, SIRT1, INS	180	22	19453	14.7371	1	0.0991878	0.0860437
BP	response to fatty acid	3	1.66667	0.0172365	SCD, PLAT, PTGS2	180	22	19453	14.7371	1	0.0991878	0.0860437
BP	negative regulation of ossification	3	1.66667	0.0172365	CALCA, TGFB1, BCL2	180	22	19453	14.7371	1	0.0991878	0.0860437
BP	phosphatidylinositol-3-phosphate biosynthetic process	3	1.66667	0.0172365	PIK3CA, PIK3CB, PIK3CG	180	22	19453	14.7371	1	0.0991878	0.0860437
BP	cell migration involved in sprouting angiogenesis	3	1.66667	0.0172365	ITGB1, AKT1, VEGFA	180	22	19453	14.7371	1	0.0991878	0.0860437
BP	positive regulation of cardiac muscle hypertrophy	3	1.66667	0.0187652	ROCK1, PARP1, PRKCA	180	23	19453	14.0964	1	0.102226	0.088679
MF	histone acetyltransferase binding	3	1.66667	0.0230458	CEBPB, STAT1, TP53	180	25	18967	12.6447	0.999999	0.169387	0.153543
MF	low-density lipoprotein particle receptor binding	3	1.66667	0.0230458	CRP, APP, HSP90B1	180	25	18967	12.6447	0.999999	0.169387	0.153543
MF	R-SMAD binding	3	1.66667	0.0230458	JUN, PARP1, FOS	180	25	18967	12.6447	0.999999	0.169387	0.153543
BP	positive regulation of lipid biosynthetic process	3	1.66667	0.0187652	AKT1, PPARA, INS	180	23	19453	14.0964	1	0.102226	0.088679
BP	regulation of peptidyl-tyrosine phosphorylation	3	1.66667	0.0187652	APP, FYN, EGFR	180	23	19453	14.0964	1	0.102226	0.088679
BP	cytolysis	3	1.66667	0.0187652	PLA2G2A, PRF1, GZMB	180	23	19453	14.0964	1	0.102226	0.088679
BP	negative regulation of interleukin-17 production	3	1.66667	0.0187652	TGFB1, IFNG, TLR4	180	23	19453	14.0964	1	0.102226	0.088679
BP	negative regulation of neurogenesis	3	1.66667	0.0203489	IL6, IL1B, TNF	180	24	19453	13.509	1	0.110015	0.0954358
BP	regulation of cytoskeleton organization	3	1.66667	0.0219863	MAPK1, PTK2, MAPK3	180	25	19453	12.9687	1	0.117511	0.101939
BP	response to radiation	3	1.66667	0.0219863	BCL2, CCR4, TNF	180	25	19453	12.9687	1	0.117511	0.101939
BP	positive regulation of protein autophosphorylation	3	1.66667	0.0219863	SRC, INS, VEGFA	180	25	19453	12.9687	1	0.117511	0.101939
BP	positive regulation of macrophage cytokine production	3	1.66667	0.0219863	P2RX7, SIRT1, TLR4	180	25	19453	12.9687	1	0.117511	0.101939
BP	regulation of protein binding	3	1.66667	0.0236765	CDC42, APP, SRC	180	26	19453	12.4699	1	0.124705	0.108179
BP	positive regulation of endothelial cell apoptotic process	3	1.66667	0.0236765	TGFB1, CD40LG, CCL2	180	26	19453	12.4699	1	0.124705	0.108179
BP	positive regulation of focal adhesion assembly	3	1.66667	0.0236765	ROCK1, RAC1, VEGFA	180	26	19453	12.4699	1	0.124705	0.108179
BP	positive regulation of long-term synaptic potentiation	3	1.66667	0.0236765	APP, MME, INS	180	26	19453	12.4699	1	0.124705	0.108179
BP	positive regulation of wound healing	3	1.66667	0.0236765	ITGB1, PTK2, MYLK	180	26	19453	12.4699	1	0.124705	0.108179
BP	positive regulation of cholesterol efflux	3	1.66667	0.0254182	NFKBIA, CAV1, SIRT1	180	27	19453	12.008	1	0.1329	0.115288
BP	toll-like receptor signaling pathway	3	1.66667	0.0272104	TLR9, IRAK4, TLR4	180	28	19453	11.5792	1	0.137246	0.119058
BP	positive regulation of DNA replication	3	1.66667	0.0272104	CDC42, EGF, EGFR	180	28	19453	11.5792	1	0.137246	0.119058
BP	positive regulation of protein tyrosine kinase activity	3	1.66667	0.0290521	APP, ACE, ERBB3	180	29	19453	11.1799	1	0.144252	0.125136
BP	peripheral nervous system development	3	1.66667	0.0290521	EDNRB, ERBB3, ERBB2	180	29	19453	11.1799	1	0.144252	0.125136
BP	protein autoprocessing	3	1.66667	0.0290521	PARP1, CASP6, CASP1	180	29	19453	11.1799	1	0.144252	0.125136
BP	positive regulation of catalytic activity	3	1.66667	0.0290521	CAV1, BCL2, SOD1	180	29	19453	11.1799	1	0.144252	0.125136
BP	negative regulation of myoblast differentiation	3	1.66667	0.0290521	CXCL10, TGFB1, TNF	180	29	19453	11.1799	1	0.144252	0.125136
BP	cellular response to gamma radiation	3	1.66667	0.0309422	MDM2, TP53, BCL2L1	180	30	19453	10.8072	1	0.152577	0.132358
BP	amyloid fibril formation	3	1.66667	0.0309422	APP, RIPK3, MDM2	180	30	19453	10.8072	1	0.152577	0.132358
BP	heterotypic cell-cell adhesion	3	1.66667	0.0309422	ITGB1, VCAM1, PTPRC	180	30	19453	10.8072	1	0.152577	0.132358
BP	homeostasis of number of cells within a tissue	3	1.66667	0.0328796	P2RX7, NOS3, BCL2	180	31	19453	10.4586	1	0.160745	0.139443
BP	cortical actin cytoskeleton organization	3	1.66667	0.0328796	IKBKB, ROCK1, TNF	180	31	19453	10.4586	1	0.160745	0.139443
BP	activation of protein kinase B activity	3	1.66667	0.0328796	SRC, INSR, INS	180	31	19453	10.4586	1	0.160745	0.139443
BP	positive regulation of release of sequestered calcium ion into cytosol	3	1.66667	0.0328796	CXCL10, CXCL11, F2	180	31	19453	10.4586	1	0.160745	0.139443
BP	positive regulation of activated T cell proliferation	3	1.66667	0.0328796	IL23A, IL2RA, IL2	180	31	19453	10.4586	1	0.160745	0.139443
BP	endochondral ossification	3	1.66667	0.0348634	COL1A1, MMP13, MMP16	180	32	19453	10.1318	1	0.168144	0.145862
BP	positive regulation of p38MAPK cascade	3	1.66667	0.0348634	IL1B, XDH, VEGFA	180	32	19453	10.1318	1	0.168144	0.145862
BP	negative regulation of DNA binding	3	1.66667	0.0348634	NFKBIA, JUN, HMOX1	180	32	19453	10.1318	1	0.168144	0.145862
MF	NAD+ nucleosidase activity	3	1.66667	0.0285088	TLR9, CD38, TLR4	180	28	18967	11.2899	1	0.18835	0.170732
BP	face morphogenesis	3	1.66667	0.0348634	COL1A1, TGFB1, MMP2	180	32	19453	10.1318	1	0.168144	0.145862
BP	response to electrical stimulus	3	1.66667	0.0348634	P2RX7, SRC, MMP2	180	32	19453	10.1318	1	0.168144	0.145862
BP	positive regulation of neurogenesis	3	1.66667	0.0348634	ACE, IFNG, MME	180	32	19453	10.1318	1	0.168144	0.145862
BP	maintenance of permeability of blood-brain barrier	3	1.66667	0.0368925	ITGB1, IL6, PTGS2	180	33	19453	9.82475	1	0.170457	0.147868
BP	cellular response to fibroblast growth factor stimulus	3	1.66667	0.0368925	COL1A1, CXCL8, CCL2	180	33	19453	9.82475	1	0.170457	0.147868
BP	regulation of mitochondrial membrane potential	3	1.66667	0.0368925	BCL2, BCL2L1, SOD1	180	33	19453	9.82475	1	0.170457	0.147868
BP	proteolysis involved in cellular protein catabolic process	3	1.66667	0.0368925	MDM2, GZMB, CTSB	180	33	19453	9.82475	1	0.170457	0.147868
BP	positive regulation of DNA binding	3	1.66667	0.0368925	EGF, MMP8, MMP9	180	33	19453	9.82475	1	0.170457	0.147868
BP	response to organic substance	3	1.66667	0.038966	MMP9, RELA, SOD1	180	34	19453	9.53578	1	0.178594	0.154927
BP	positive regulation of mitotic cell cycle	3	1.66667	0.038966	APP, MDM2, PRKCA	180	34	19453	9.53578	1	0.178594	0.154927
BP	negative regulation of inflammatory response to antigenic stimulus	3	1.66667	0.038966	SRC, FYN, MAPK14	180	34	19453	9.53578	1	0.178594	0.154927
BP	response to exogenous dsRNA	3	1.66667	0.0410828	NFKBIA, MAPK1, MAPK3	180	35	19453	9.26333	1	0.187395	0.162562
BP	positive regulation of cell migration involved in sprouting angiogenesis	3	1.66667	0.0410828	HMOX1, PTGS2, VEGFA	180	35	19453	9.26333	1	0.187395	0.162562
BP	positive regulation of defense response to virus by host	3	1.66667	0.0410828	IL4, STAT1, IL23A	180	35	19453	9.26333	1	0.187395	0.162562
BP	positive regulation of T cell mediated cytotoxicity	3	1.66667	0.043242	P2RX7, PTPRC, IL23A	180	36	19453	9.00602	1	0.195684	0.169752
BP	intrinsic apoptotic signaling pathway in response to endoplasmic reticulum stress	3	1.66667	0.043242	CEBPB, BCL2, TP53	180	36	19453	9.00602	1	0.195684	0.169752
MF	protein phosphatase 2A binding	3	1.66667	0.034433	STAT1, BCL2, TP53	180	31	18967	10.1973	1	0.22249	0.201679
BP	defense response to fungus	3	1.66667	0.043242	TGFB1, CTSG, MPO	180	36	19453	9.00602	1	0.195684	0.169752
BP	activation of innate immune response	3	1.66667	0.043242	TBK1, CASP6, TLR4	180	36	19453	9.00602	1	0.195684	0.169752
BP	negative regulation of fibroblast proliferation	3	1.66667	0.0454426	GSTP1, CAV1, TP53	180	37	19453	8.76261	1	0.198421	0.172127
BP	regulation of heart rate	3	1.66667	0.0454426	EDNRA, EDNRB, MDM2	180	37	19453	8.76261	1	0.198421	0.172127
BP	response to tumor necrosis factor	3	1.66667	0.0454426	CASP3, PTGS2, SELE	180	37	19453	8.76261	1	0.198421	0.172127
BP	regulation of I-kappaB kinase/NF-kappaB signaling	3	1.66667	0.0454426	IL1B, HSPB1, TNF	180	37	19453	8.76261	1	0.198421	0.172127
BP	positive regulation of intrinsic apoptotic signaling pathway	3	1.66667	0.0454426	RIPK3, CAV1, TP53	180	37	19453	8.76261	1	0.198421	0.172127
BP	positive regulation of neuroblast proliferation	3	1.66667	0.0454426	ITGB1, HIF1A, VEGFA	180	37	19453	8.76261	1	0.198421	0.172127
BP	spleen development	3	1.66667	0.0454426	ADAM17, RIPK3, BCL2	180	37	19453	8.76261	1	0.198421	0.172127
BP	negative regulation of cytokine production	3	1.66667	0.0476838	IL10, CASP3, BTK	180	38	19453	8.53202	1	0.207573	0.180066
BP	negative regulation of interleukin-8 production	3	1.66667	0.0499645	IL10, TLR9, ELANE	180	39	19453	8.31325	1	0.216841	0.188106
MF	extracellular matrix binding	3	1.66667	0.0365051	ADAMTS5, SPP1, VEGFA	180	32	18967	9.87865	1	0.22333	0.20244
MF	fibronectin binding	3	1.66667	0.0365051	ITGB1, MMP2, VEGFA	180	32	18967	9.87865	1	0.22333	0.20244
MF	tumor necrosis factor receptor binding	3	1.66667	0.0365051	CD40LG, STAT1, TNF	180	32	18967	9.87865	1	0.22333	0.20244
MF	NF-kappaB binding	3	1.66667	0.0452512	NFKBIA, APEX1, RELA	180	36	18967	8.78102	1	0.263064	0.238458
MF	NAD binding	3	1.66667	0.047547	LDHB, HPGD, PARP1	180	37	18967	8.54369	1	0.263751	0.239081
MF	peroxidase activity	3	1.66667	0.047547	PTGS2, MPO, PTGS1	180	37	18967	8.54369	1	0.263751	0.239081
MF	phosphoprotein binding	3	1.66667	0.0498846	TBK1, SRC, PLAT	180	38	18967	8.31886	1	0.269102	0.243931
MF	disordered domain specific binding	3	1.66667	0.0498846	MDM2, FYN, TP53	180	38	18967	8.31886	1	0.269102	0.243931
CC	ERBB3:ERBB2 complex	2	1.11111	0.0172643	ERBB3, ERBB2	180	2	20647	114.706	0.996863	0.0952416	0.0799914
MF	L-glucuronate reductase activity	2	1.11111	0.0187863	AKR1A1, AKR1B1	180	2	18967	105.372	0.999985	0.15132	0.137166
MF	glycerol dehydrogenase [NADP+] activity	2	1.11111	0.0187863	AKR1A1, AKR1B1	180	2	18967	105.372	0.999985	0.15132	0.137166
MF	interleukin-8 receptor activity	2	1.11111	0.0187863	CXCR1, CXCR2	180	2	18967	105.372	0.999985	0.15132	0.137166
MF	prostaglandin-endoperoxide synthase activity	2	1.11111	0.0187863	PTGS2, PTGS1	180	2	18967	105.372	0.999985	0.15132	0.137166
MF	peptidyl-dipeptidase activity	2	1.11111	0.0187863	ACE2, ACE	180	2	18967	105.372	0.999985	0.15132	0.137166
MF	PTB domain binding	2	1.11111	0.0280474	APP, INSR	180	3	18967	70.2481	1	0.187408	0.169878
MF	JUN kinase activity	2	1.11111	0.0280474	MAPK10, MAPK8	180	3	18967	70.2481	1	0.187408	0.169878
MF	endothelin receptor activity	2	1.11111	0.0280474	EDNRA, EDNRB	180	3	18967	70.2481	1	0.187408	0.169878
MF	nitric-oxide synthase activity	2	1.11111	0.0280474	NOS2, NOS3	180	3	18967	70.2481	1	0.187408	0.169878
MF	IkappaB kinase activity	2	1.11111	0.0280474	IKBKB, CHUK	180	3	18967	70.2481	1	0.187408	0.169878
CC	phosphatidylinositol 3-kinase complex, class IB	2	1.11111	0.0342323	PIK3CA, PIK3CG	180	4	20647	57.3528	0.99999	0.174321	0.146409
CC	peptidase inhibitor complex	2	1.11111	0.0342323	SERPINE1, CTSB	180	4	20647	57.3528	0.99999	0.174321	0.146409
MF	allyl-alcohol dehydrogenase activity	2	1.11111	0.0372216	AKR1A1, AKR1B1	180	4	18967	52.6861	1	0.22333	0.20244
MF	tetrahydrobiopterin binding	2	1.11111	0.0372216	NOS2, NOS3	180	4	18967	52.6861	1	0.22333	0.20244
MF	interleukin-8 binding	2	1.11111	0.0372216	CXCR1, CXCR2	180	4	18967	52.6861	1	0.22333	0.20244
MF	exopeptidase activity	2	1.11111	0.0372216	ACE, MME	180	4	18967	52.6861	1	0.22333	0.20244
CC	transcription factor AP-1 complex	2	1.11111	0.0426066	JUN, FOS	180	5	20647	45.8822	0.999999	0.207394	0.174186
BP	deoxyinosine catabolic process	2	1.11111	0.0183191	PNP, XDH	180	2	19453	108.072	1	0.10134	0.0879106
BP	chronic inflammatory response to antigenic stimulus	2	1.11111	0.0183191	IL10, TNF	180	2	19453	108.072	1	0.10134	0.0879106
BP	wound healing involved in inflammatory response	2	1.11111	0.0183191	HMOX1, TLR4	180	2	19453	108.072	1	0.10134	0.0879106
BP	positive regulation of vitamin D biosynthetic process	2	1.11111	0.0183191	IFNG, TNF	180	2	19453	108.072	1	0.10134	0.0879106
BP	interleukin-8-mediated signaling pathway	2	1.11111	0.0183191	CXCR1, CXCR2	180	2	19453	108.072	1	0.10134	0.0879106
BP	inosine catabolic process	2	1.11111	0.0183191	PNP, XDH	180	2	19453	108.072	1	0.10134	0.0879106
BP	smooth muscle hyperplasia	2	1.11111	0.0183191	NOS3, HMOX1	180	2	19453	108.072	1	0.10134	0.0879106
BP	dendritic cell apoptotic process	2	1.11111	0.0183191	BCL2, BCL2L1	180	2	19453	108.072	1	0.10134	0.0879106
BP	regulation of fever generation	2	1.11111	0.0183191	EDNRB, PTGES	180	2	19453	108.072	1	0.10134	0.0879106
BP	regulation of CD4-positive, alpha-beta T cell proliferation	2	1.11111	0.0183191	IL2RA, IL2	180	2	19453	108.072	1	0.10134	0.0879106
BP	negative regulation of interleukin-23 production	2	1.11111	0.0183191	RAC1, TLR4	180	2	19453	108.072	1	0.10134	0.0879106
BP	negative regulation of gap junction assembly	2	1.11111	0.0183191	ACE, IL1B	180	2	19453	108.072	1	0.10134	0.0879106
BP	mononuclear cell proliferation	2	1.11111	0.0183191	TGFB1, ACE	180	2	19453	108.072	1	0.10134	0.0879106
BP	regulation of the force of heart contraction by chemical signal	2	1.11111	0.0183191	NOS3, CAV1	180	2	19453	108.072	1	0.10134	0.0879106
BP	positive regulation of dephosphorylation	2	1.11111	0.0183191	ROCK1, SRC	180	2	19453	108.072	1	0.10134	0.0879106
BP	swimming behavior	2	1.11111	0.0183191	ALK, IDO1	180	2	19453	108.072	1	0.10134	0.0879106
BP	response to gold nanoparticle	2	1.11111	0.0183191	MPO, TNF	180	2	19453	108.072	1	0.10134	0.0879106
BP	deoxyadenosine catabolic process	2	1.11111	0.0273532	PNP, XDH	180	3	19453	72.0481	1	0.137246	0.119058
BP	angiotensin-activated signaling pathway involved in heart process	2	1.11111	0.0273532	SRC, CAV1	180	3	19453	72.0481	1	0.137246	0.119058
BP	response to UV-A	2	1.11111	0.0273532	AKT1, EGFR	180	3	19453	72.0481	1	0.137246	0.119058
BP	cellular response to norepinephrine stimulus	2	1.11111	0.0273532	APP, PRKD1	180	3	19453	72.0481	1	0.137246	0.119058
BP	cellular response to prolactin	2	1.11111	0.0273532	SRC, FOS	180	3	19453	72.0481	1	0.137246	0.119058
BP	L-ascorbic acid biosynthetic process	2	1.11111	0.0273532	AKR1A1, AKR1B1	180	3	19453	72.0481	1	0.137246	0.119058
BP	cardiac neural crest cell development involved in heart development	2	1.11111	0.0273532	MAPK1, MAPK3	180	3	19453	72.0481	1	0.137246	0.119058
BP	positive regulation of plasma cell differentiation	2	1.11111	0.0273532	IL10, IL2	180	3	19453	72.0481	1	0.137246	0.119058
MF	insulin binding	2	1.11111	0.0463097	INSR, PIK3R1	180	5	18967	42.1489	1	0.263064	0.238458
MF	CXCR3 chemokine receptor binding	2	1.11111	0.0463097	CXCL10, CXCL11	180	5	18967	42.1489	1	0.263064	0.238458
MF	prostaglandin E receptor activity	2	1.11111	0.0463097	HPGD, PTGER2	180	5	18967	42.1489	1	0.263064	0.238458
MF	histone deacetylase regulator activity	2	1.11111	0.0463097	MAPK8, TP53	180	5	18967	42.1489	1	0.263064	0.238458
BP	regulation of T cell homeostatic proliferation	2	1.11111	0.0273532	IL2RA, IL2	180	3	19453	72.0481	1	0.137246	0.119058
BP	dendritic cell proliferation	2	1.11111	0.0273532	TBK1, BCL2L1	180	3	19453	72.0481	1	0.137246	0.119058
BP	respiratory burst involved in defense response	2	1.11111	0.0273532	MPO, PIK3CG	180	3	19453	72.0481	1	0.137246	0.119058
BP	positive regulation of isotype switching to IgE isotypes	2	1.11111	0.0273532	IL4, STAT6	180	3	19453	72.0481	1	0.137246	0.119058
BP	negative regulation of helicase activity	2	1.11111	0.0273532	SIRT1, TP53	180	3	19453	72.0481	1	0.137246	0.119058
BP	regulation of dendritic cell cytokine production	2	1.11111	0.0273532	TLR9, TLR4	180	3	19453	72.0481	1	0.137246	0.119058
BP	endothelin receptor signaling pathway involved in heart process	2	1.11111	0.0273532	CDC42, EDNRA	180	3	19453	72.0481	1	0.137246	0.119058
BP	positive regulation of leukocyte adhesion to arterial endothelial cell	2	1.11111	0.0273532	ALOX5, TNF	180	3	19453	72.0481	1	0.137246	0.119058
BP	renal albumin absorption	2	1.11111	0.0273532	EDNRA, EDNRB	180	3	19453	72.0481	1	0.137246	0.119058
BP	blood coagulation, common pathway	2	1.11111	0.0273532	THBD, F2	180	3	19453	72.0481	1	0.137246	0.119058
BP	fever generation	2	1.11111	0.0273532	IL1A, IL1B	180	3	19453	72.0481	1	0.137246	0.119058
BP	negative regulation of secretion	2	1.11111	0.0273532	ERBB3, EGF	180	3	19453	72.0481	1	0.137246	0.119058
BP	sequestering of triglyceride	2	1.11111	0.0363045	IL1B, TNF	180	4	19453	54.0361	1	0.169382	0.146936
BP	regulation of isotype switching	2	1.11111	0.0363045	IL10, IL4	180	4	19453	54.0361	1	0.169382	0.146936
BP	positive regulation of hyaluronan biosynthetic process	2	1.11111	0.0363045	EGF, HAS2	180	4	19453	54.0361	1	0.169382	0.146936
BP	positive regulation of synoviocyte proliferation	2	1.11111	0.0363045	BTK, TNF	180	4	19453	54.0361	1	0.169382	0.146936
BP	response to epidermal growth factor	2	1.11111	0.0363045	MAPK1, MAPK3	180	4	19453	54.0361	1	0.169382	0.146936
BP	positive regulation of peptidyl-tyrosine autophosphorylation	2	1.11111	0.0363045	ACE, VEGFA	180	4	19453	54.0361	1	0.169382	0.146936
BP	stress-induced premature senescence	2	1.11111	0.0363045	MAPK14, SIRT1	180	4	19453	54.0361	1	0.169382	0.146936
BP	negative regulation of smooth muscle contraction	2	1.11111	0.0363045	CALCA, PTGS2	180	4	19453	54.0361	1	0.169382	0.146936
BP	neutrophil mediated killing of gram-negative bacterium	2	1.11111	0.0363045	F2, ELANE	180	4	19453	54.0361	1	0.169382	0.146936
BP	sympathetic neuron axon guidance	2	1.11111	0.0363045	EDNRA, ECE1	180	4	19453	54.0361	1	0.169382	0.146936
BP	cellular response to actinomycin D	2	1.11111	0.0363045	MDM2, TP53	180	4	19453	54.0361	1	0.169382	0.146936
BP	regulation of microglial cell activation	2	1.11111	0.0363045	IL6, MMP8	180	4	19453	54.0361	1	0.169382	0.146936
BP	regulation of brown fat cell differentiation	2	1.11111	0.0363045	FTO, SIRT1	180	4	19453	54.0361	1	0.169382	0.146936
BP	ERBB2-ERBB3 signaling pathway	2	1.11111	0.0363045	ERBB3, ERBB2	180	4	19453	54.0361	1	0.169382	0.146936
BP	regulation of interleukin-8 production	2	1.11111	0.0363045	CRP, PTPRC	180	4	19453	54.0361	1	0.169382	0.146936
BP	regulation of blood vessel remodeling	2	1.11111	0.0363045	TGFB1, FLT4	180	4	19453	54.0361	1	0.169382	0.146936
BP	T cell activation via T cell receptor contact with antigen bound to MHC molecule on antigen presenting cell	2	1.11111	0.0363045	ITGAL, ICAM1	180	4	19453	54.0361	1	0.169382	0.146936
BP	response to macrophage colony-stimulating factor	2	1.11111	0.0363045	SPP1, TNF	180	4	19453	54.0361	1	0.169382	0.146936
BP	negative regulation of primary miRNA processing	2	1.11111	0.0363045	IL6, STAT3	180	4	19453	54.0361	1	0.169382	0.146936
BP	dAMP catabolic process	2	1.11111	0.0363045	PNP, XDH	180	4	19453	54.0361	1	0.169382	0.146936
BP	negative regulation of cell volume	2	1.11111	0.0451739	P2RX7, KCNMA1	180	5	19453	43.2289	1	0.198421	0.172127
BP	bronchiole development	2	1.11111	0.0451739	MMP12, TGFB1	180	5	19453	43.2289	1	0.198421	0.172127
BP	B cell lineage commitment	2	1.11111	0.0451739	BCL2, TP53	180	5	19453	43.2289	1	0.198421	0.172127
BP	negative regulation of extracellular matrix disassembly	2	1.11111	0.0451739	DPP4, TGFB1	180	5	19453	43.2289	1	0.198421	0.172127
BP	cellular response to staurosporine	2	1.11111	0.0451739	CASP6, CASP3	180	5	19453	43.2289	1	0.198421	0.172127
BP	response to fructose	2	1.11111	0.0451739	PTGS2, TNF	180	5	19453	43.2289	1	0.198421	0.172127
BP	regulation of entry of bacterium into host cell	2	1.11111	0.0451739	CXCL8, CAV1	180	5	19453	43.2289	1	0.198421	0.172127
BP	positive regulation of protein complex disassembly	2	1.11111	0.0451739	INSR, TNF	180	5	19453	43.2289	1	0.198421	0.172127
BP	nucleotide-binding oligomerization domain containing 1 signaling pathway	2	1.11111	0.0451739	NFKBIA, TLR4	180	5	19453	43.2289	1	0.198421	0.172127
BP	heparin metabolic process	2	1.11111	0.0451739	EDNRA, EDNRB	180	5	19453	43.2289	1	0.198421	0.172127
BP	positive regulation of nitric oxide mediated signal transduction	2	1.11111	0.0451739	EGFR, INS	180	5	19453	43.2289	1	0.198421	0.172127
BP	negative regulation of calcium ion transport into cytosol	2	1.11111	0.0451739	CALCA, BCL2	180	5	19453	43.2289	1	0.198421	0.172127
BP	positive regulation of epithelial tube formation	2	1.11111	0.0451739	EGF, VEGFA	180	5	19453	43.2289	1	0.198421	0.172127
BP	IMP catabolic process	2	1.11111	0.0451739	PNP, XDH	180	5	19453	43.2289	1	0.198421	0.172127

## Sheet: KEGG
Category	Term	Count	%	PValue	Genes	List Total	Pop Hits	Pop Total	Fold Enrichment	Bonferroni	Benjamini	FDR
KEGG_PATHWAY	Pathways in cancer	58	32.2222	5.79157e-28	ITGB1, ALK, CXCL8, FLT4, PIK3CB, IKBKB, EDNRA, EDNRB, CASP3, AKT1, PIM2, RAC1, MAP2K1, CHUK, MMP1, MMP2, PRKCA, FOS, F2, MMP9, IFNG, PIK3CA, IL23A, TP53, ROCK1, GSTP1, PTGER2, PIK3R1, PTGS2, HIF1A, EGFR, RELA, HSP90B1, CDC42, MAPK8, ERBB2, HMOX1, MAPK1, STAT6, MAPK3, EGLN1, JUN, TGFB1, NOS2, EGF, STAT1, STAT3, IL2, PTK2, VEGFA, NFKBIA, MAPK10, IL4, IL6, IL2RA, BCL2, MDM2, BCL2L1	171	531	8644	5.52144	1.57531e-25	3.93827e-26	1.70851e-26
KEGG_PATHWAY	Lipid and atherosclerosis	45	25	2.28392e-33	CXCL8, SRC, PIK3CB, PIK3R1, TNF, CXCL2, RELA, HSP90B1, ICAM1, IKBKB, CDC42, MAPK8, TBK1, CASP6, CASP3, CASP1, CCL2, AKT1, MAPK1, RAC1, MAPK3, JUN, VCAM1, CHUK, MMP1, NOS3, MMP3, STAT3, PRKCA, FOS, IRAK4, MAPK14, SELE, MMP9, PTK2, MAPK10, NFKBIA, IL6, CD40LG, PIK3CA, IL1B, BCL2, TP53, TLR4, BCL2L1	171	215	8644	10.5802	6.21226e-31	3.10613e-31	1.34751e-31
KEGG_PATHWAY	Coronavirus disease - COVID-19	38	21.1111	6.25056e-24	CFD, CXCL8, C5AR1, PIK3CB, PIK3R1, TNF, RELA, EGFR, IKBKB, MAPK8, TBK1, CASP1, CCL2, MAPK1, MAPK3, JUN, ACE, CHUK, MMP1, STAT1, MMP3, STAT3, PRKCA, TYK2, FOS, IRAK4, MAPK14, F2, IL2, MAPK10, NFKBIA, ACE2, CXCL10, ADAM17, IL6, PIK3CA, IL1B, TLR4	171	232	8644	8.27969	1.70015e-21	1.70015e-22	7.37566e-23
KEGG_PATHWAY	PI3K-Akt signaling pathway	37	20.5556	1.78699e-16	ITGB1, FLT4, PIK3CB, PIK3R1, RELA, EGFR, PIK3CG, HSP90B1, INS, IKBKB, ERBB3, ERBB2, SPP1, AKT1, MAPK1, RAC1, MCL1, MAPK3, MAP2K1, CHUK, EGF, NOS3, INSR, PRKCA, IL2, PTK2, VEGFA, IL4, COL1A1, IL6, PIK3CA, IL2RA, BCL2, MDM2, TP53, TLR4, BCL2L1	171	359	8644	5.20986	6.03961e-14	1.56794e-15	6.80209e-16
KEGG_PATHWAY	AGE-RAGE signaling pathway in diabetic complications	35	19.4444	6.06995e-34	CXCL8, SERPINE1, PIK3CB, PIK3R1, TNF, RELA, ICAM1, CDC42, THBD, MAPK8, CASP3, CCL2, AKT1, MAPK1, RAC1, MAPK3, JUN, TGFB1, VCAM1, NOS3, STAT1, MMP2, STAT3, PRKCA, MAPK14, SELE, F3, VEGFA, MAPK10, COL1A1, IL1A, IL6, PIK3CA, IL1B, BCL2	171	100	8644	17.6924	1.65103e-31	1.65103e-31	7.16254e-32
KEGG_PATHWAY	Fluid shear stress and atherosclerosis	35	19.4444	1.68139e-28	SRC, GSTP1, PLAT, PIK3CB, PIK3R1, TNF, RELA, HSP90B1, ICAM1, IKBKB, THBD, MAPK8, CCL2, AKT1, HMOX1, RAC1, JUN, VCAM1, CHUK, NOS3, CAV1, MMP2, FOS, MAPK14, SELE, MMP9, PTK2, VEGFA, MAPK10, IL1A, IFNG, PIK3CA, IL1B, BCL2, TP53	171	139	8644	12.7283	4.57338e-26	1.52446e-26	6.61347e-27
KEGG_PATHWAY	Yersinia infection	33	18.3333	3.76417e-26	ITGB1, CXCL8, ROCK1, SRC, PIK3CB, PIK3R1, TNF, RELA, IKBKB, CDC42, MAPK8, TBK1, CASP1, CCL2, AKT1, MAPK1, RAC1, MAPK3, IL10, JUN, MAP2K1, CHUK, FOS, IRAK4, MAPK14, IL2, PTK2, MAPK10, NFKBIA, IL6, PIK3CA, IL1B, TLR4	171	137	8644	12.1762	1.02385e-23	1.27982e-24	5.55215e-25
KEGG_PATHWAY	Hepatitis B	33	18.3333	1.02529e-23	CXCL8, SRC, PIK3CB, PIK3R1, TNF, RELA, IKBKB, MAPK8, TBK1, CASP3, AKT1, MAPK1, STAT6, MAPK3, JUN, MAP2K1, TGFB1, CHUK, STAT1, STAT3, PRKCA, TYK2, FOS, IRAK4, MAPK14, MMP9, MAPK10, NFKBIA, IL6, PIK3CA, BCL2, TP53, TLR4	171	162	8644	10.2972	2.78878e-21	2.53526e-22	1.09985e-22
KEGG_PATHWAY	Kaposi sarcoma-associated herpesvirus infection	33	18.3333	3.44461e-21	CXCL8, SRC, PIK3CB, PIK3R1, PTGS2, HIF1A, CXCL2, RELA, PIK3CG, ICAM1, IKBKB, MAPK8, TBK1, CASP3, AKT1, MAPK1, RAC1, CCR4, MAPK3, JUN, MAP2K1, CHUK, STAT1, STAT3, TYK2, FOS, MAPK14, VEGFA, MAPK10, NFKBIA, IL6, PIK3CA, TP53	171	194	8644	8.59866	9.36934e-19	6.69238e-20	2.90331e-20
KEGG_PATHWAY	Proteoglycans in cancer	33	18.3333	1.95707e-20	ITGB1, ROCK1, SRC, PIK3CB, PIK3R1, HIF1A, TNF, EGFR, CDC42, ERBB3, PLAU, CASP3, ERBB2, AKT1, MAPK1, RAC1, MAPK3, MAP2K1, TGFB1, CAV1, MMP2, STAT3, PRKCA, MAPK14, MMP9, PTK2, PPP1CA, VEGFA, COL1A1, PIK3CA, MDM2, TP53, TLR4	171	205	8644	8.13727	5.32324e-18	3.47958e-19	1.50952e-19
KEGG_PATHWAY	Human cytomegalovirus infection	32	17.7778	3.45187e-18	CXCL8, ROCK1, SRC, PTGER2, PIK3CB, PIK3R1, PTGS2, TNF, RELA, EGFR, IKBKB, TBK1, CASP3, CXCR2, CCL2, AKT1, MAPK1, RAC1, MAPK3, MAP2K1, CHUK, STAT3, PRKCA, MAPK14, PTK2, VEGFA, NFKBIA, IL6, PIK3CA, IL1B, MDM2, TP53	171	225	8644	7.18929	9.38908e-16	3.75563e-17	1.62928e-17
KEGG_PATHWAY	Shigellosis	32	17.7778	5.27633e-17	ITGB1, CXCL8, ROCK1, SRC, ILK, PIK3CB, PIK3R1, TNF, RELA, EGFR, IKBKB, CDC42, MAPK8, TBK1, CASP1, AKT1, MAPK1, RAC1, MAPK3, JUN, CHUK, MAPK14, PTK2, MAPK10, NFKBIA, PIK3CA, IL1B, BCL2, MDM2, TP53, TLR4, BCL2L1	171	247	8644	6.54895	1.43516e-14	4.78387e-16	2.07536e-16
KEGG_PATHWAY	TNF signaling pathway	31	17.2222	3.25692e-26	CEBPB, PIK3CB, PIK3R1, PTGS2, TNF, CXCL2, RELA, ICAM1, IKBKB, MAPK8, CASP3, CCL2, AKT1, MAPK1, MAPK3, JUN, MAP2K1, VCAM1, RIPK3, CHUK, MMP3, FOS, MAPK14, SELE, MMP9, MAPK10, NFKBIA, CXCL10, IL6, PIK3CA, IL1B	171	114	8644	13.746	8.85881e-24	1.27982e-24	5.55215e-25
KEGG_PATHWAY	Focal adhesion	31	17.2222	1.69953e-18	ITGB1, ROCK1, SRC, FLT4, ILK, PIK3CB, PIK3R1, EGFR, MYLK, CDC42, MAPK8, ERBB2, SPP1, AKT1, MAPK1, FYN, RAC1, MAPK3, PAK4, JUN, MAP2K1, EGF, CAV1, PRKCA, PTK2, PPP1CA, VEGFA, MAPK10, COL1A1, PIK3CA, BCL2	171	203	8644	7.71941	4.62272e-16	1.92613e-17	8.35601e-18
KEGG_PATHWAY	Salmonella infection	31	17.2222	6.67089e-16	CXCL8, PIK3CB, TNF, RELA, PIK3CG, HSP90B1, IKBKB, CDC42, MAPK8, CASP3, CASP1, AKT1, MAPK1, RAC1, MAPK3, JUN, MAP2K1, RIPK3, CHUK, FOS, IRAK4, MAPK14, MAPK10, NFKBIA, IL6, PTPRC, PIK3CA, IL1B, BCL2, TLR9, TLR4	171	249	8644	6.29334	1.81188e-13	5.18423e-15	2.24904e-15
KEGG_PATHWAY	MAPK signaling pathway	31	17.2222	1.11177e-13	FLT4, HSPB1, TNF, RELA, EGFR, INS, IKBKB, CDC42, MAPK8, ERBB3, CASP3, ERBB2, AKT1, MAPK1, RAC1, MAPK3, JUN, MAP2K1, TGFB1, CHUK, EGF, INSR, PRKCA, FOS, IRAK4, MAPK14, VEGFA, MAPK10, IL1A, IL1B, TP53	171	301	8644	5.20612	3.02283e-11	6.57394e-13	2.85193e-13
KEGG_PATHWAY	Chagas disease	30	16.6667	1.98984e-26	CXCL8, SERPINE1, PIK3CB, PIK3R1, TNF, RELA, IKBKB, MAPK8, CCL2, AKT1, MAPK1, MAPK3, IL10, JUN, TGFB1, ACE, NOS2, CHUK, FOS, IRAK4, MAPK14, IL2, MAPK10, NFKBIA, IL6, IFNG, PIK3CA, IL1B, TLR9, TLR4	171	102	8644	14.8676	5.41237e-24	1.08247e-24	4.69603e-25
KEGG_PATHWAY	Toll-like receptor signaling pathway	30	16.6667	1.23962e-25	CXCL8, PIK3CB, PIK3R1, TNF, RELA, IKBKB, MAPK8, TBK1, SPP1, AKT1, MAPK1, RAC1, MAPK3, JUN, MAP2K1, CHUK, STAT1, TYK2, FOS, IRAK4, MAPK14, MAPK10, NFKBIA, CXCL10, CXCL11, IL6, PIK3CA, IL1B, TLR9, TLR4	171	108	8644	14.0416	3.37177e-23	3.74641e-24	1.62528e-24
KEGG_PATHWAY	IL-17 signaling pathway	29	16.1111	3.62548e-26	CEBPB, CXCL8, PTGS2, TNF, CXCL2, RELA, HSP90B1, IKBKB, MAPK8, TBK1, CASP3, CCL2, MAPK1, MAPK3, JUN, CHUK, MMP1, MMP3, FOS, MAPK14, MMP9, MAPK10, IL4, NFKBIA, CXCL10, IL6, MMP13, IFNG, IL1B	171	94	8644	15.5951	9.86131e-24	1.27982e-24	5.55215e-25
KEGG_PATHWAY	Measles	28	15.5556	5.57163e-20	PIK3CB, PIK3R1, RELA, IKBKB, MAPK8, TBK1, CASP3, AKT1, JUN, CHUK, STAT1, STAT3, TYK2, FOS, IRAK4, IL2, MAPK10, NFKBIA, IL1A, IL6, PIK3CA, IL1B, IL2RA, BCL2, TLR9, TP53, TLR4, BCL2L1	171	138	8644	10.2565	1.51548e-17	8.41935e-19	3.65251e-19
KEGG_PATHWAY	Influenza A	28	15.5556	1.81245e-17	CXCL8, PIK3CB, PIK3R1, TNF, RELA, ICAM1, IKBKB, TBK1, CASP3, CASP1, CCL2, AKT1, MAPK1, MAPK3, MAP2K1, CHUK, STAT1, PRKCA, TYK2, IRAK4, NFKBIA, IL1A, CXCL10, IL6, IFNG, PIK3CA, IL1B, TLR4	171	171	8644	8.27715	4.92988e-15	1.69996e-16	7.37482e-17
KEGG_PATHWAY	Chemokine signaling pathway	28	15.5556	3.70933e-16	ITK, CXCL8, ROCK1, SRC, PIK3CB, PIK3R1, CXCL2, RELA, PIK3CG, IKBKB, CDC42, CXCR1, CXCR2, CCL2, AKT1, MAPK1, RAC1, CCR4, MAPK3, MAP2K1, CHUK, STAT1, STAT3, PTK2, NFKBIA, CXCL10, CXCL11, PIK3CA	171	192	8644	7.37183	9.05942e-14	3.05739e-15	1.32637e-15
KEGG_PATHWAY	Epstein-Barr virus infection	28	15.5556	1.47163e-15	PIK3CB, PIK3R1, ITGAL, TNF, RELA, ICAM1, IKBKB, MAPK8, TBK1, CASP3, AKT1, RAC1, JUN, CHUK, STAT1, STAT3, TYK2, IRAK4, MAPK14, MAPK10, NFKBIA, CXCL10, IL6, PIK3CA, BCL2, MDM2, BTK, TP53	171	202	8644	7.00689	3.92575e-13	1.1119e-14	4.82367e-15
KEGG_PATHWAY	Chemical carcinogenesis - reactive oxygen species	28	15.5556	1.86295e-14	SRC, PIK3CB, PIK3R1, HIF1A, RELA, EGFR, IKBKB, MAPK8, AKT1, HMOX1, MAPK1, RAC1, MAPK3, JUN, MAP2K1, CHUK, EGF, EPHX2, AKR1A1, FOS, MAPK14, PTK2, SOD1, VEGFA, MAPK10, NFKBIA, PIK3CA, PRKD1	171	223	8644	6.34705	5.07328e-12	1.26681e-13	5.49571e-14
KEGG_PATHWAY	HIF-1 signaling pathway	27	15	1.33567e-21	SERPINE1, PIK3CB, PIK3R1, HIF1A, RELA, EGFR, INS, LDHB, ERBB2, AKT1, HMOX1, MAPK1, MAPK3, EGLN1, MAP2K1, NOS2, EGF, NOS3, INSR, STAT3, PRKCA, VEGFA, IL6, IFNG, PIK3CA, BCL2, TLR4	171	109	8644	12.5215	3.63302e-19	3.02752e-20	1.31341e-20
KEGG_PATHWAY	Toxoplasmosis	27	15	2.20768e-21	ITGB1, TNF, RELA, PIK3CG, IKBKB, MAPK8, CASP3, ALOX5, AKT1, MAPK1, MAPK3, IL10, TGFB1, NOS2, CHUK, STAT1, STAT3, TYK2, IRAK4, MAPK14, MAPK10, NFKBIA, CD40LG, IFNG, BCL2, TLR4, BCL2L1	171	111	8644	12.2959	6.00489e-19	4.61914e-20	2.00389e-20
KEGG_PATHWAY	T cell receptor signaling pathway	27	15	2.33143e-20	ITK, PIK3CB, PIK3R1, TNF, RELA, IKBKB, CDC42, MAPK8, AKT1, MAPK1, FYN, MAPK3, PAK4, IL10, JUN, MAP2K1, CHUK, FOS, MAPK14, IL2, MAPK10, IL4, NFKBIA, PTPRC, CD40LG, IFNG, PIK3CA	171	121	8644	11.2797	6.3415e-18	3.73029e-19	1.61829e-19
KEGG_PATHWAY	Relaxin signaling pathway	27	15	1.30408e-19	SRC, PIK3CB, PIK3R1, RELA, EGFR, MAPK8, EDNRB, AKT1, MAPK1, MAPK3, JUN, MAP2K1, TGFB1, NOS2, MMP1, NOS3, MMP2, PRKCA, FOS, MAPK14, MMP9, VEGFA, MAPK10, NFKBIA, COL1A1, MMP13, PIK3CA	171	129	8644	10.5802	3.54709e-17	1.77355e-18	7.69406e-19
KEGG_PATHWAY	Apoptosis	27	15	5.30758e-19	PRF1, PIK3CB, PIK3R1, TNF, RELA, IKBKB, MAPK8, CASP6, CASP3, AKT1, MAPK1, CTSD, MCL1, MAPK3, CTSB, JUN, MAP2K1, PARP1, CHUK, GZMB, FOS, MAPK10, NFKBIA, PIK3CA, BCL2, TP53, BCL2L1	171	136	8644	10.0356	1.44366e-16	6.5621e-18	2.84679e-18
KEGG_PATHWAY	NOD-like receptor signaling pathway	27	15	1.81393e-15	CXCL8, TNF, CXCL2, RELA, IKBKB, MAPK8, TBK1, CASP1, CCL2, MAPK1, MAPK3, CTSB, JUN, RIPK3, CHUK, STAT1, TYK2, IRAK4, MAPK14, MAPK10, P2RX7, NFKBIA, IL6, IL1B, BCL2, TLR4, BCL2L1	171	186	8644	7.33786	4.83169e-13	1.33348e-14	5.78497e-15
KEGG_PATHWAY	Human immunodeficiency virus 1 infection	27	15	4.38574e-14	PIK3CB, PIK3R1, TNF, RELA, IKBKB, MAPK8, TBK1, CASP3, AKT1, MAPK1, RAC1, MAPK3, PAK4, JUN, MAP2K1, CHUK, PRKCA, FOS, IRAK4, MAPK14, PTK2, MAPK10, NFKBIA, PIK3CA, BCL2, TLR4, BCL2L1	171	212	8644	6.43793	1.19282e-11	2.90957e-13	1.26224e-13
KEGG_PATHWAY	Osteoclast differentiation	26	14.4444	5.95445e-18	PIK3CB, PIK3R1, TNF, RELA, IKBKB, MAPK8, AKT1, MAPK1, FYN, RAC1, MAPK3, JUN, MAP2K1, TGFB1, CHUK, STAT1, TYK2, FOS, MAPK14, MAPK10, NFKBIA, IL1A, IFNG, PIK3CA, IL1B, BTK	171	135	8644	9.7355	1.61961e-15	5.99856e-17	2.60231e-17
KEGG_PATHWAY	Pathogenic Escherichia coli infection	26	14.4444	7.19452e-14	ITGB1, CXCL8, ROCK1, SRC, TNF, RELA, IKBKB, CDC42, MAPK8, CASP3, CASP1, MAPK1, FYN, RAC1, MAPK3, JUN, CHUK, FOS, IRAK4, MAPK14, F2, MAPK10, NFKBIA, IL6, IL1B, TLR4	171	198	8644	6.63784	1.95683e-11	4.34869e-13	1.88656e-13
KEGG_PATHWAY	MicroRNAs in cancer	26	14.4444	1.48175e-09	ROCK1, PIK3CB, PIK3R1, PTGS2, EGFR, IKBKB, ERBB3, PLAU, CASP3, ERBB2, HMOX1, MAPK1, MCL1, MAPK3, PAK4, MAP2K1, STAT3, PRKCA, MMP9, SIRT1, VEGFA, MMP16, PIK3CA, BCL2, MDM2, TP53	171	310	8644	4.23965	4.03035e-07	5.23423e-09	2.27073e-09
KEGG_PATHWAY	Human papillomavirus infection	26	14.4444	5.72957e-09	ITGB1, PIK3CB, PIK3R1, PTGS2, TNF, RELA, EGFR, IKBKB, CDC42, TBK1, CASP3, SPP1, AKT1, MAPK1, MAPK3, MAP2K1, CHUK, EGF, STAT1, TYK2, PTK2, VEGFA, COL1A1, PIK3CA, MDM2, TP53	171	331	8644	3.97067	1.55844e-06	1.87764e-08	8.14566e-09
KEGG_PATHWAY	C-type lectin receptor signaling pathway	25	13.8889	1.23757e-19	SRC, PIK3CB, PIK3R1, PTGS2, TNF, RELA, IKBKB, MAPK8, CASP1, AKT1, MAPK1, MAPK3, IL10, JUN, CHUK, STAT1, MAPK14, IL2, MAPK10, NFKBIA, IL6, PIK3CA, IL23A, IL1B, MDM2	171	104	8644	12.1514	3.36618e-17	1.77167e-18	7.68593e-19
KEGG_PATHWAY	Tuberculosis	25	13.8889	6.95502e-14	CEBPB, SRC, TNF, RELA, MAPK8, CASP3, AKT1, MAPK1, CTSD, MAPK3, IL10, TGFB1, NOS2, STAT1, IRAK4, MAPK14, MAPK10, IL1A, IL6, IFNG, IL23A, IL1B, BCL2, TLR9, TLR4	171	180	8644	7.02079	1.8904e-11	4.29947e-13	1.86521e-13
KEGG_PATHWAY	Ras signaling pathway	25	13.8889	2.70594e-11	FLT4, PIK3CB, PIK3R1, RELA, EGFR, INS, IKBKB, CDC42, MAPK8, TBK1, AKT1, MAPK1, RAC1, MAPK3, PAK4, MAP2K1, CHUK, EGF, INSR, PLA2G2A, PRKCA, VEGFA, MAPK10, PIK3CA, BCL2L1	171	236	8644	5.35484	7.36014e-09	1.15002e-10	4.98907e-11
KEGG_PATHWAY	Prostate cancer	24	13.3333	3.87003e-19	MAP2K1, CHUK, EGF, GSTP1, MMP3, PLAT, PIK3CB, PIK3R1, MMP9, EGFR, RELA, INS, HSP90B1, NFKBIA, IKBKB, PIK3CA, PLAU, ERBB2, MDM2, BCL2, AKT1, MAPK1, TP53, MAPK3	171	97	8644	12.5071	1.05265e-16	5.01261e-18	2.17459e-18
KEGG_PATHWAY	Th17 cell differentiation	24	13.3333	5.17e-18	JUN, TGFB1, CHUK, STAT1, STAT3, TYK2, FOS, MAPK14, HIF1A, IL2, RELA, MAPK10, IL4, NFKBIA, IKBKB, IL6, MAPK8, IFNG, IL23A, IL1B, IL2RA, MAPK1, STAT6, MAPK3	171	108	8644	11.2333	1.40624e-15	5.40862e-17	2.34638e-17
KEGG_PATHWAY	Human T-cell leukemia virus 1 infection	24	13.3333	4.9827e-11	MAP2K1, JUN, TGFB1, CHUK, PIK3CB, PIK3R1, FOS, ITGAL, TNF, IL2, RELA, ICAM1, MAPK10, NFKBIA, IKBKB, IL6, MAPK8, PIK3CA, IL2RA, AKT1, MAPK1, TP53, BCL2L1, MAPK3	171	222	8644	5.46483	1.3553e-08	2.05348e-10	8.90846e-11
KEGG_PATHWAY	Alzheimer disease	24	13.3333	1.61255e-06	APP, MAP2K1, NOS2, MME, CHUK, INSR, PIK3CB, PIK3R1, PTGS2, TNF, RELA, INS, MAPK10, IKBKB, IL1A, IL6, ADAM17, MAPK8, PIK3CA, IL1B, CASP3, AKT1, MAPK1, MAPK3	171	384	8644	3.15936	0.000438517	4.25838e-06	1.84739e-06
KEGG_PATHWAY	Herpes simplex virus 1 infection	24	13.3333	0.00016263	CHUK, STAT1, SRC, TYK2, PIK3CB, PIK3R1, IRAK4, TNF, RELA, PPP1CA, NFKBIA, IKBKB, IL6, TBK1, IFNG, PIK3CA, IL1B, CASP3, BCL2, TLR9, CCL2, AKT1, TP53, BCL2L1	171	512	8644	2.36952	0.0432747	0.000335117	0.00016263
KEGG_PATHWAY	Pancreatic cancer	23	12.7778	2.04681e-20	MAP2K1, TGFB1, CHUK, STAT1, EGF, STAT3, PIK3CB, PIK3R1, EGFR, RELA, VEGFA, MAPK10, CDC42, IKBKB, MAPK8, PIK3CA, ERBB2, AKT1, MAPK1, RAC1, TP53, BCL2L1, MAPK3	171	76	8644	15.2979	5.56732e-18	3.47958e-19	1.50952e-19
KEGG_PATHWAY	PD-L1 expression and PD-1 checkpoint pathway in cancer	23	12.7778	9.04209e-19	ALK, MAP2K1, JUN, CHUK, STAT1, EGF, STAT3, PIK3CB, PIK3R1, FOS, MAPK14, HIF1A, EGFR, RELA, NFKBIA, IKBKB, IFNG, PIK3CA, TLR9, AKT1, MAPK1, TLR4, MAPK3	171	89	8644	13.0634	2.45945e-16	1.06933e-17	4.63899e-18
KEGG_PATHWAY	Non-alcoholic fatty liver disease	23	12.7778	2.25402e-13	JUN, TGFB1, CXCL8, INSR, PIK3CB, PIK3R1, FOS, MAPK14, TNF, RELA, INS, MAPK10, CDC42, IKBKB, IL1A, IL6, MAPK8, PIK3CA, IL1B, CASP3, AKT1, RAC1, PPARA	171	155	8644	7.50092	6.13021e-11	1.25121e-12	5.42804e-13
KEGG_PATHWAY	Hepatitis C	23	12.7778	3.37217e-13	MAP2K1, CHUK, STAT1, EGF, STAT3, TYK2, PIK3CB, PIK3R1, TNF, EGFR, RELA, NFKBIA, IKBKB, CXCL10, TBK1, IFNG, PIK3CA, CASP3, AKT1, MAPK1, PPARA, TP53, MAPK3	171	158	8644	7.3585	9.17115e-11	1.79849e-12	7.80227e-13
KEGG_PATHWAY	FoxO signaling pathway	22	12.2222	6.92289e-14	IL10, MAP2K1, TGFB1, CHUK, EGF, INSR, STAT3, PIK3CB, PIK3R1, MAPK14, SIRT1, EGFR, INS, MAPK10, IKBKB, IL6, MAPK8, PIK3CA, MDM2, AKT1, MAPK1, MAPK3	171	131	8644	8.48926	1.88436e-11	4.29947e-13	1.86521e-13
KEGG_PATHWAY	Alcoholic liver disease	22	12.2222	3.59551e-13	CXCL8, CHUK, C5AR1, IRAK4, MAPK14, CXCL2, SIRT1, TNF, RELA, MAPK10, NFKBIA, IKBKB, IL6, MAPK8, TBK1, SCD, IL1B, CASP3, FASN, AKT1, PPARA, TLR4	171	142	8644	7.83164	9.78115e-11	1.88073e-12	8.15905e-13
KEGG_PATHWAY	Diabetic cardiomyopathy	22	12.2222	3.80055e-10	TGFB1, ACE, PARP1, NOS3, MMP2, INSR, PRKCA, PIK3CB, PIK3R1, MAPK14, MMP9, RELA, INS, PPP1CA, MAPK10, COL1A1, MAPK8, PIK3CA, AKT1, RAC1, PPARA, CTSD	171	203	8644	5.47829	1.03375e-07	1.47678e-09	6.40664e-10
KEGG_PATHWAY	Pathways of neurodegeneration - multiple diseases	22	12.2222	0.000407642	APP, MAP2K1, NOS2, PRKCA, PTGS2, MAPK14, TNF, RELA, SOD1, MAPK10, IL1A, IL6, MAPK8, TBK1, IL1B, CASP3, BCL2, MAPK1, UBA1, RAC1, BCL2L1, MAPK3	171	476	8644	2.33633	0.104973	0.000797688	0.000407642
KEGG_PATHWAY	Pertussis	21	11.6667	9.73786e-18	IL10, ITGB1, JUN, CXCL8, NOS2, FOS, IRAK4, MAPK14, TNF, RELA, MAPK10, IL1A, IL6, MAPK8, IL23A, IL1B, CASP3, CASP1, MAPK1, TLR4, MAPK3	171	76	8644	13.9677	2.6487e-15	9.45964e-17	4.10381e-17
KEGG_PATHWAY	Endocrine resistance	21	11.6667	2.18261e-15	MAP2K1, JUN, SRC, MMP2, PIK3CB, PIK3R1, FOS, MAPK14, MMP9, EGFR, PTK2, MAPK10, MAPK8, PIK3CA, ERBB2, MDM2, BCL2, AKT1, MAPK1, TP53, MAPK3	171	98	8644	10.8321	6.03961e-13	1.56229e-14	6.77759e-15
KEGG_PATHWAY	Rap1 signaling pathway	21	11.6667	4.40958e-09	ITGB1, MAP2K1, SRC, EGF, FLT4, INSR, PRKCA, PIK3CB, PIK3R1, ITGAL, MAPK14, EGFR, INS, VEGFA, CDC42, PIK3CA, AKT1, MAPK1, PRKD1, RAC1, MAPK3	171	210	8644	5.05497	1.19941e-06	1.51824e-08	6.58647e-09
KEGG_PATHWAY	Chemical carcinogenesis - receptor activation	21	11.6667	5.19982e-09	MAP2K1, JUN, SRC, EGF, EPHX2, STAT3, PRKCA, PIK3CB, PIK3R1, FOS, CYP3A4, EGFR, RELA, HSP90B1, VEGFA, PIK3CA, BCL2, AKT1, MAPK1, PPARA, MAPK3	171	212	8644	5.00728	1.41435e-06	1.76794e-08	7.66974e-09
KEGG_PATHWAY	Regulation of actin cytoskeleton	21	11.6667	1.9577e-08	ITGB1, MAP2K1, ROCK1, SRC, EGF, PIK3CB, PIK3R1, ITGAL, F2, EGFR, PTK2, INS, PPP1CA, MYLK, CDC42, PIK3CA, AKT1, MAPK1, RAC1, PAK4, MAPK3	171	229	8644	4.63556	5.32492e-06	5.85157e-08	2.53855e-08
KEGG_PATHWAY	Leishmaniasis	20	11.1111	2.48423e-16	IL10, ITGB1, JUN, TGFB1, NOS2, STAT1, FOS, IRAK4, PTGS2, MAPK14, TNF, RELA, IL4, NFKBIA, IL1A, IFNG, IL1B, MAPK1, TLR4, MAPK3	171	77	8644	13.1298	6.03961e-14	2.11159e-15	9.16059e-16
KEGG_PATHWAY	Amoebiasis	20	11.1111	6.779e-14	IL10, TGFB1, CXCL8, NOS2, HSPB1, PRKCA, PIK3CB, PIK3R1, CXCL2, TNF, RELA, PTK2, COL1A1, IL6, IFNG, PIK3CA, IL1B, CASP3, CTSG, TLR4	171	102	8644	9.91171	1.8451e-11	4.29947e-13	1.86521e-13
KEGG_PATHWAY	Sphingolipid signaling pathway	20	11.1111	1.70077e-12	MAP2K1, ROCK1, NOS3, PRKCA, PIK3CB, PIK3R1, MAPK14, TNF, RELA, MAPK10, MAPK8, PIK3CA, BCL2, AKT1, MAPK1, FYN, RAC1, CTSD, TP53, MAPK3	171	121	8644	8.35532	4.62604e-10	7.84084e-12	3.40154e-12
KEGG_PATHWAY	JAK-STAT signaling pathway	20	11.1111	4.92121e-10	IL10, STAT1, EGF, STAT3, TYK2, PIK3CB, PIK3R1, EGFR, IL2, IL4, IL6, IFNG, PIK3CA, IL23A, IL2RA, BCL2, AKT1, STAT6, MCL1, BCL2L1	171	166	8644	6.09033	1.33857e-07	1.88531e-09	8.17891e-10
KEGG_PATHWAY	Neutrophil extracellular trap formation	20	11.1111	5.35386e-09	MAP2K1, SRC, C5AR1, PRKCA, PIK3CB, PIK3R1, FPR2, ITGAL, MAPK14, MPO, RELA, PIK3CA, CASP1, AKT1, MAPK1, CTSG, RAC1, TLR4, ELANE, MAPK3	171	191	8644	5.29316	1.45625e-06	1.77591e-08	7.70433e-09
KEGG_PATHWAY	cAMP signaling pathway	20	11.1111	7.80885e-08	MAP2K1, JUN, ROCK1, PTGER2, PIK3CB, PIK3R1, FOS, RELA, PPP1CA, MAPK10, NFKBIA, EDNRA, MAPK8, PIK3CA, PDE4B, AKT1, MAPK1, RAC1, PPARA, MAPK3	171	225	8644	4.49331	2.12398e-05	2.28388e-07	9.908e-08
KEGG_PATHWAY	Cytokine-cytokine receptor interaction	20	11.1111	5.44219e-06	IL10, TGFB1, CXCL8, CXCL2, TNF, IL2, IL4, IL1A, CXCL10, CXCL11, IL6, CD40LG, IFNG, CXCR1, IL23A, IL1B, IL2RA, CXCR2, CCL2, CCR4	171	297	8644	3.40402	0.00147918	1.35805e-05	5.89155e-06
KEGG_PATHWAY	NF-kappa B signaling pathway	19	10.5556	1.20682e-12	VCAM1, CXCL8, PARP1, CHUK, IRAK4, PTGS2, CXCL2, TNF, RELA, ICAM1, NFKBIA, IKBKB, CD40LG, PLAU, IL1B, BCL2, BTK, TLR4, BCL2L1	171	104	8644	9.23504	3.28253e-10	5.67303e-12	2.4611e-12
KEGG_PATHWAY	Neurotrophin signaling pathway	19	10.5556	1.30248e-11	MAP2K1, JUN, PIK3CB, PIK3R1, IRAK4, MAPK14, RELA, MAPK10, CDC42, NFKBIA, IKBKB, MAPK8, PIK3CA, BCL2, AKT1, MAPK1, RAC1, TP53, MAPK3	171	119	8644	8.07096	3.54275e-09	5.71412e-11	2.47892e-11
KEGG_PATHWAY	Platelet activation	19	10.5556	2.65878e-11	ITGB1, ROCK1, NOS3, SRC, PIK3CB, PIK3R1, F2, MAPK14, PIK3CG, PTGS1, PPP1CA, MYLK, COL1A1, PIK3CA, BTK, AKT1, MAPK1, FYN, MAPK3	171	124	8644	7.74552	7.23189e-09	1.14792e-10	4.97995e-11
KEGG_PATHWAY	VEGF signaling pathway	18	10	5.71687e-16	MAP2K1, NOS3, SRC, SH2D2A, HSPB1, PRKCA, PIK3CB, PIK3R1, PTGS2, MAPK14, PTK2, VEGFA, CDC42, PIK3CA, AKT1, MAPK1, RAC1, MAPK3	171	59	8644	15.4219	1.5099e-13	4.5735e-15	1.98409e-15
KEGG_PATHWAY	Epithelial cell signaling in Helicobacter pylori infection	18	10	1.4092e-14	JUN, CXCL8, CHUK, SRC, MAPK14, CXCL2, EGFR, RELA, MAPK10, CDC42, NFKBIA, IKBKB, ADAM17, MAPK8, CXCR1, CASP3, CXCR2, RAC1	171	70	8644	12.9985	3.83515e-12	9.82828e-14	4.26374e-14
KEGG_PATHWAY	EGFR tyrosine kinase inhibitor resistance	18	10	1.22525e-13	MAP2K1, SRC, EGF, STAT3, PRKCA, PIK3CB, PIK3R1, EGFR, VEGFA, IL6, PIK3CA, ERBB3, ERBB2, BCL2, AKT1, MAPK1, BCL2L1, MAPK3	171	79	8644	11.5177	3.33387e-11	7.09081e-13	3.07616e-13
KEGG_PATHWAY	ErbB signaling pathway	18	10	4.42113e-13	MAP2K1, JUN, SRC, EGF, PRKCA, PIK3CB, PIK3R1, EGFR, PTK2, MAPK10, MAPK8, PIK3CA, ERBB3, ERBB2, AKT1, MAPK1, PAK4, MAPK3	171	85	8644	10.7046	1.20249e-10	2.22694e-12	9.66098e-13
KEGG_PATHWAY	Colorectal cancer	18	10	5.4186e-13	MAP2K1, JUN, TGFB1, EGF, PIK3CB, PIK3R1, FOS, EGFR, MAPK10, MAPK8, PIK3CA, CASP3, BCL2, AKT1, MAPK1, RAC1, TP53, MAPK3	171	86	8644	10.5802	1.47397e-10	2.63189e-12	1.14178e-12
KEGG_PATHWAY	Th1 and Th2 cell differentiation	18	10	1.73315e-12	JUN, CHUK, STAT1, TYK2, FOS, MAPK14, IL2, RELA, MAPK10, IL4, NFKBIA, IKBKB, MAPK8, IFNG, IL2RA, MAPK1, STAT6, MAPK3	171	92	8644	9.89016	4.71422e-10	7.85693e-12	3.40852e-12
KEGG_PATHWAY	Rheumatoid arthritis	18	10	2.08513e-12	JUN, TGFB1, CXCL8, MMP1, MMP3, FOS, ITGAL, CXCL2, TNF, ICAM1, VEGFA, IL1A, IL6, IFNG, IL23A, IL1B, CCL2, TLR4	171	93	8644	9.78381	5.6715e-10	9.29764e-12	4.03354e-12
KEGG_PATHWAY	Phospholipase D signaling pathway	18	10	4.03024e-09	MAP2K1, CXCL8, EGF, INSR, PRKCA, PIK3CB, PIK3R1, F2, EGFR, PIK3CG, INS, PIK3CA, CXCR1, CXCR2, AKT1, MAPK1, FYN, MAPK3	171	148	8644	6.14794	1.09623e-06	1.40542e-08	6.09703e-09
KEGG_PATHWAY	Efferocytosis	18	10	9.05726e-09	IL10, MAP2K1, CEBPB, TGFB1, PTGER2, ODC1, PTGS2, MAPK14, HIF1A, SIRT1, PTK2, ADAM17, CASP3, ALOX5, CASP1, MAPK1, RAC1, MAPK3	171	156	8644	5.83266	2.46357e-06	2.83169e-08	1.22846e-08
KEGG_PATHWAY	Cellular senescence	18	10	9.05726e-09	MAP2K1, TGFB1, CXCL8, SERPINE1, PIK3CB, PIK3R1, MAPK14, SIRT1, RELA, PPP1CA, IL1A, IL6, PIK3CA, MDM2, AKT1, MAPK1, TP53, MAPK3	171	156	8644	5.83266	2.46357e-06	2.83169e-08	1.22846e-08
KEGG_PATHWAY	Fc epsilon RI signaling pathway	17	9.44444	1.49157e-13	MAP2K1, PRKCA, PIK3CB, PIK3R1, MAPK14, TNF, MAPK10, IL4, MAPK8, PIK3CA, ALOX5, BTK, AKT1, MAPK1, FYN, RAC1, MAPK3	171	68	8644	12.6374	4.0556e-11	8.45225e-13	3.66679e-13
KEGG_PATHWAY	Prolactin signaling pathway	17	9.44444	2.4331e-13	MAP2K1, STAT1, SRC, STAT3, PIK3CB, PIK3R1, FOS, MAPK14, RELA, GCK, INS, MAPK10, MAPK8, PIK3CA, AKT1, MAPK1, MAPK3	171	70	8644	12.2764	6.61942e-11	1.32361e-12	5.74213e-13
KEGG_PATHWAY	Insulin resistance	17	9.44444	2.6171e-10	NOS3, INSR, STAT3, PIK3CB, PIK3R1, TNF, RELA, INS, PPP1CA, MAPK10, NFKBIA, IKBKB, IL6, MAPK8, PIK3CA, AKT1, PPARA	171	108	8644	7.9569	7.11852e-08	1.03167e-09	4.47563e-10
KEGG_PATHWAY	Estrogen signaling pathway	17	9.44444	9.29043e-09	MAP2K1, JUN, NOS3, SRC, MMP2, PIK3CB, PIK3R1, FOS, MMP9, EGFR, HSP90B1, PIK3CA, BCL2, AKT1, MAPK1, CTSD, MAPK3	171	137	8644	6.27259	2.52699e-06	2.87159e-08	1.24576e-08
KEGG_PATHWAY	Prion disease	17	9.44444	8.58572e-05	CAV1, PIK3CB, PIK3R1, MAPK14, TNF, SOD1, MAPK10, IL1A, IL6, MAPK8, PIK3CA, IL1B, CASP3, MAPK1, FYN, RAC1, MAPK3	171	272	8644	3.15936	0.0230836	0.00017964	8.58572e-05
KEGG_PATHWAY	Inflammatory bowel disease	16	8.88889	1.20969e-12	IL10, JUN, TGFB1, STAT1, STAT3, TNF, IL2, RELA, IL4, IL1A, IL6, IFNG, IL23A, IL1B, STAT6, TLR4	171	65	8644	12.443	3.29038e-10	5.67303e-12	2.4611e-12
KEGG_PATHWAY	Small cell lung cancer	16	8.88889	2.41359e-10	ITGB1, NOS2, CHUK, PIK3CB, PIK3R1, PTGS2, RELA, PTK2, NFKBIA, IKBKB, PIK3CA, CASP3, BCL2, AKT1, TP53, BCL2L1	171	92	8644	8.79125	6.56496e-08	9.65436e-10	4.18829e-10
KEGG_PATHWAY	Choline metabolism in cancer	16	8.88889	6.07709e-10	MAP2K1, JUN, EGF, PRKCA, PIK3CB, PIK3R1, FOS, HIF1A, EGFR, MAPK10, MAPK8, PIK3CA, AKT1, MAPK1, RAC1, MAPK3	171	98	8644	8.25301	1.65297e-07	2.29579e-09	9.95968e-10
KEGG_PATHWAY	Leukocyte transendothelial migration	16	8.88889	5.96729e-09	ITGB1, ITK, VCAM1, ROCK1, MMP2, PRKCA, PIK3CB, PIK3R1, ITGAL, MAPK14, MMP9, PTK2, ICAM1, CDC42, PIK3CA, RAC1	171	115	8644	7.033	1.6231e-06	1.93226e-08	8.38262e-09
KEGG_PATHWAY	Natural killer cell mediated cytotoxicity	16	8.88889	2.36758e-08	MAP2K1, PRF1, GZMB, PRKCA, PIK3CB, PIK3R1, ITGAL, TNF, ICAM1, IFNG, PIK3CA, CASP3, MAPK1, FYN, RAC1, MAPK3	171	127	8644	6.36847	6.4398e-06	6.9998e-08	3.03668e-08
KEGG_PATHWAY	Autophagy - animal	16	8.88889	7.70484e-07	MAP2K1, PIK3CB, PIK3R1, HIF1A, INS, MAPK10, MAPK8, TBK1, PIK3CA, BCL2, AKT1, MAPK1, CTSD, CTSB, BCL2L1, MAPK3	171	165	8644	4.90179	0.00020955	2.13849e-06	9.27726e-07
KEGG_PATHWAY	Transcriptional misregulation in cancer	16	8.88889	5.52641e-06	CEBPB, CXCL8, HPGD, MMP3, GZMB, PLAT, MPO, MMP9, RELA, PTK2, IL6, PLAU, MDM2, TP53, ELANE, BCL2L1	171	193	8644	4.19065	0.00150206	1.36653e-05	5.92833e-06
KEGG_PATHWAY	Viral carcinogenesis	16	8.88889	1.0857e-05	JUN, SRC, STAT3, PIK3CB, PIK3R1, RELA, CDC42, NFKBIA, PIK3CA, CASP3, MDM2, MAPK1, RAC1, CCR4, TP53, MAPK3	171	204	8644	3.96468	0.00294877	2.56792e-05	1.11403e-05
KEGG_PATHWAY	Malaria	15	8.33333	3.83685e-13	IL10, TGFB1, VCAM1, CXCL8, ITGAL, SELE, TNF, ICAM1, IL6, CD40LG, IFNG, IL1B, TLR9, CCL2, TLR4	171	50	8644	15.1649	1.04365e-10	1.9691e-12	8.54242e-13
KEGG_PATHWAY	Renal cell carcinoma	15	8.33333	4.57547e-11	EGLN1, MAP2K1, JUN, TGFB1, PIK3CB, PIK3R1, HIF1A, VEGFA, CDC42, PIK3CA, AKT1, MAPK1, RAC1, PAK4, MAPK3	171	69	8644	10.9891	1.24453e-08	1.91466e-10	8.30623e-11
KEGG_PATHWAY	Chronic myeloid leukemia	15	8.33333	1.80521e-10	MAP2K1, TGFB1, CHUK, PIK3CB, PIK3R1, RELA, NFKBIA, IKBKB, PIK3CA, MDM2, AKT1, MAPK1, TP53, BCL2L1, MAPK3	171	76	8644	9.97692	4.91018e-08	7.32863e-10	3.17933e-10
KEGG_PATHWAY	B cell receptor signaling pathway	15	8.33333	7.27377e-10	MAP2K1, JUN, CHUK, PIK3CB, PIK3R1, FOS, RELA, NFKBIA, IKBKB, PIK3CA, BTK, AKT1, MAPK1, RAC1, MAPK3	171	84	8644	9.02673	1.97847e-07	2.71023e-09	1.17576e-09
KEGG_PATHWAY	Growth hormone synthesis, secretion and action	15	8.33333	8.30418e-08	MAP2K1, STAT1, STAT3, PRKCA, PIK3CB, PIK3R1, FOS, MAPK14, PTK2, MAPK10, MAPK8, PIK3CA, AKT1, MAPK1, MAPK3	171	120	8644	6.31871	2.25871e-05	2.40291e-07	1.04244e-07
KEGG_PATHWAY	Insulin signaling pathway	15	8.33333	4.39448e-07	MAP2K1, INSR, PIK3CB, PIK3R1, GCK, INS, PPP1CA, MAPK10, IKBKB, MAPK8, PIK3CA, FASN, AKT1, MAPK1, MAPK3	171	137	8644	5.53464	0.000119523	1.2451e-06	5.40155e-07
KEGG_PATHWAY	Oxytocin signaling pathway	15	8.33333	1.82867e-06	MAP2K1, JUN, ROCK1, NOS3, SRC, PRKCA, FOS, PTGS2, EGFR, PIK3CG, PPP1CA, MYLK, CD38, MAPK1, MAPK3	171	154	8644	4.92367	0.000497274	4.73712e-06	2.05507e-06
KEGG_PATHWAY	Necroptosis	15	8.33333	2.67913e-06	PARP1, RIPK3, STAT1, STAT3, TYK2, TNF, MAPK10, IL1A, MAPK8, IFNG, IL1B, CASP1, BCL2, STAT6, TLR4	171	159	8644	4.76884	0.00072846	6.81051e-06	2.95456e-06
KEGG_PATHWAY	Axon guidance	15	8.33333	1.29516e-05	ITGB1, ROCK1, SRC, ILK, PRKCA, PIK3CB, PIK3R1, PTK2, CDC42, PIK3CA, MAPK1, FYN, RAC1, PAK4, MAPK3	171	182	8644	4.16618	0.00351667	3.01098e-05	1.30623e-05
KEGG_PATHWAY	Bladder cancer	14	7.77778	4.53832e-13	MAP2K1, CXCL8, MMP1, SRC, EGF, MMP2, MMP9, EGFR, VEGFA, ERBB2, MDM2, MAPK1, TP53, MAPK3	171	41	8644	17.2609	1.2345e-10	2.24441e-12	9.73677e-13
KEGG_PATHWAY	Non-small cell lung cancer	14	7.77778	1.07676e-09	ALK, MAP2K1, EGF, STAT3, PRKCA, PIK3CB, PIK3R1, EGFR, PIK3CA, ERBB2, AKT1, MAPK1, TP53, MAPK3	171	72	8644	9.82911	2.92879e-07	3.90505e-09	1.6941e-09
KEGG_PATHWAY	Breast cancer	14	7.77778	5.88413e-06	MAP2K1, JUN, EGF, FLT4, PIK3CB, PIK3R1, FOS, EGFR, PIK3CA, ERBB2, AKT1, MAPK1, TP53, MAPK3	171	147	8644	4.81426	0.00159921	1.44188e-05	6.2552e-06
KEGG_PATHWAY	cGMP-PKG signaling pathway	14	7.77778	2.35235e-05	MAP2K1, ROCK1, NOS3, INSR, PIK3CG, INS, PPP1CA, MYLK, EDNRA, EDNRB, KCNMA1, AKT1, MAPK1, MAPK3	171	167	8644	4.2377	0.00637804	5.20194e-05	2.35235e-05
KEGG_PATHWAY	Hepatocellular carcinoma	14	7.77778	2.5035e-05	MAP2K1, TGFB1, GSTP1, PRKCA, PIK3CB, PIK3R1, EGFR, PIK3CA, AKT1, HMOX1, MAPK1, TP53, BCL2L1, MAPK3	171	168	8644	4.21248	0.00678648	5.49156e-05	2.5035e-05
KEGG_PATHWAY	Calcium signaling pathway	14	7.77778	0.00142128	NOS2, NOS3, EGF, FLT4, PRKCA, EGFR, MYLK, VEGFA, P2RX7, EDNRA, EDNRB, ERBB3, ERBB2, CD38	171	253	8644	2.79722	0.320816	0.00264787	0.00142128
KEGG_PATHWAY	Acute myeloid leukemia	13	7.22222	5.32697e-09	MAP2K1, CHUK, STAT3, PIK3CB, PIK3R1, MPO, RELA, IKBKB, PIK3CA, AKT1, MAPK1, PIM2, MAPK3	171	67	8644	9.80815	1.44894e-06	1.77591e-08	7.70433e-09
KEGG_PATHWAY	Central carbon metabolism in cancer	13	7.22222	8.97939e-09	MAP2K1, PIK3CB, PIK3R1, HIF1A, EGFR, GCK, LDHB, PIK3CA, ERBB2, AKT1, MAPK1, TP53, MAPK3	171	70	8644	9.3878	2.44239e-06	2.83169e-08	1.22846e-08
KEGG_PATHWAY	Platinum drug resistance	13	7.22222	1.47445e-08	GSTP1, PIK3CB, PIK3R1, PIK3CA, CASP3, ERBB2, MDM2, BCL2, AKT1, MAPK1, TP53, BCL2L1, MAPK3	171	73	8644	9.002	4.01049e-06	4.45611e-08	1.93316e-08
KEGG_PATHWAY	Viral protein interaction with cytokine and cytokine receptor	13	7.22222	5.31834e-07	IL10, CXCL8, CXCL2, TNF, IL2, CXCL10, CXCL11, IL6, CXCR1, IL2RA, CXCR2, CCL2, CCR4	171	100	8644	6.57146	0.000144649	1.49133e-06	6.46974e-07
KEGG_PATHWAY	Thyroid hormone signaling pathway	13	7.22222	4.14431e-06	MAP2K1, STAT1, SRC, PRKCA, PIK3CB, PIK3R1, HIF1A, PIK3CA, MDM2, AKT1, MAPK1, TP53, MAPK3	171	121	8644	5.43096	0.00112662	1.04375e-05	4.52804e-06
KEGG_PATHWAY	Gastric cancer	13	7.22222	3.48835e-05	MAP2K1, TGFB1, EGF, PIK3CB, PIK3R1, EGFR, PIK3CA, ERBB2, BCL2, AKT1, MAPK1, TP53, MAPK3	171	149	8644	4.41038	0.00944362	7.47112e-05	3.48835e-05
KEGG_PATHWAY	mTOR signaling pathway	13	7.22222	5.48634e-05	MAP2K1, CHUK, INSR, PRKCA, PIK3CB, PIK3R1, TNF, INS, IKBKB, PIK3CA, AKT1, MAPK1, MAPK3	171	156	8644	4.21248	0.0148125	0.000116585	5.48634e-05
KEGG_PATHWAY	Type II diabetes mellitus	12	6.66667	9.05291e-10	MAPK10, IKBKB, MAPK8, PIK3CA, INSR, MAPK1, PIK3CB, PIK3R1, TNF, GCK, MAPK3, INS	171	46	8644	13.1869	2.46239e-07	3.32756e-09	1.44357e-09
KEGG_PATHWAY	Endometrial cancer	12	6.66667	1.25977e-08	MAP2K1, PIK3CA, EGF, ERBB2, MAPK1, ILK, AKT1, PIK3CB, PIK3R1, TP53, EGFR, MAPK3	171	58	8644	10.4586	3.42656e-06	3.85007e-08	1.67025e-08
KEGG_PATHWAY	Glioma	12	6.66667	2.02968e-07	MAP2K1, PIK3CA, EGF, MDM2, MAPK1, AKT1, PRKCA, PIK3CB, PIK3R1, TP53, EGFR, MAPK3	171	75	8644	8.08795	5.52057e-05	5.81129e-07	2.52107e-07
KEGG_PATHWAY	GnRH signaling pathway	12	6.66667	1.86036e-06	MAPK10, CDC42, MAP2K1, JUN, MAPK8, SRC, MMP2, MAPK1, PRKCA, MAPK14, EGFR, MAPK3	171	93	8644	6.52254	0.000505892	4.77377e-06	2.07097e-06
KEGG_PATHWAY	Cholinergic synapse	12	6.66667	1.26326e-05	MAP2K1, PIK3CA, BCL2, MAPK1, AKT1, FYN, PRKCA, FOS, PIK3CB, PIK3R1, PIK3CG, MAPK3	171	113	8644	5.36811	0.0034302	2.96213e-05	1.28504e-05
KEGG_PATHWAY	African trypanosomiasis	11	6.11111	1.46322e-09	IL10, IL6, VCAM1, IFNG, IL1B, TLR9, PRKCA, SELE, TNF, IDO1, ICAM1	171	37	8644	15.0283	3.97995e-07	5.23423e-09	2.27073e-09
KEGG_PATHWAY	RIG-I-like receptor signaling pathway	11	6.11111	1.08979e-06	MAPK10, NFKBIA, IKBKB, CXCL10, MAPK8, TBK1, CXCL8, CHUK, MAPK14, TNF, RELA	171	71	8644	7.83164	0.00029638	2.99418e-06	1.29895e-06
KEGG_PATHWAY	Melanoma	11	6.11111	1.24431e-06	MAP2K1, PIK3CA, EGF, MDM2, MAPK1, AKT1, PIK3CB, PIK3R1, TP53, EGFR, MAPK3	171	72	8644	7.72287	0.000338396	3.35102e-06	1.45375e-06
KEGG_PATHWAY	Cytosolic DNA-sensing pathway	11	6.11111	1.82829e-06	NFKBIA, IKBKB, CXCL10, IL6, TBK1, RIPK3, CHUK, IL1B, CASP3, CASP1, RELA	171	75	8644	7.41396	0.000497172	4.73712e-06	2.05507e-06
KEGG_PATHWAY	Fc gamma R-mediated phagocytosis	11	6.11111	1.91166e-05	CDC42, MAP2K1, PTPRC, PIK3CA, MAPK1, AKT1, PRKCA, RAC1, PIK3CB, PIK3R1, MAPK3	171	97	8644	5.73244	0.00518626	4.29728e-05	1.91166e-05
KEGG_PATHWAY	Inflammatory mediator regulation of TRP channels	11	6.11111	2.0932e-05	MAPK10, MAPK8, PIK3CA, SRC, IL1B, PTGER2, PRKCA, PIK3CB, PIK3R1, MAPK14, PPP1CA	171	98	8644	5.67395	0.00567739	4.66681e-05	2.0932e-05
KEGG_PATHWAY	Progesterone-mediated oocyte maturation	11	6.11111	2.97537e-05	MAPK10, MAP2K1, MAPK8, PIK3CA, MAPK1, AKT1, PIK3CB, PIK3R1, MAPK14, MAPK3, INS	171	102	8644	5.45144	0.00806047	6.47441e-05	2.97537e-05
KEGG_PATHWAY	Vascular smooth muscle contraction	11	6.11111	0.000296794	MAP2K1, EDNRA, CALCA, ROCK1, KCNMA1, PLA2G2A, MAPK1, PRKCA, PPP1CA, MAPK3, MYLK	171	134	8644	4.1496	0.0775664	0.000597985	0.000296794
KEGG_PATHWAY	Apelin signaling pathway	11	6.11111	0.000398541	MAP2K1, NOS2, NOS3, SERPINE1, SPP1, MAPK1, AKT1, PLAT, PIK3CG, MAPK3, MYLK	171	139	8644	4.00034	0.102753	0.000785529	0.000398541
KEGG_PATHWAY	Legionellosis	10	5.55556	1.22036e-06	NFKBIA, IL6, CXCL8, IL1B, CASP3, CASP1, TNF, CXCL2, TLR4, RELA	171	56	8644	9.02673	0.000331884	3.31939e-06	1.44003e-06
KEGG_PATHWAY	Adipocytokine signaling pathway	10	5.55556	7.33319e-06	MAPK10, NFKBIA, IKBKB, MAPK8, CHUK, STAT3, AKT1, PPARA, TNF, RELA	171	69	8644	7.32604	0.00199265	1.76516e-05	7.65767e-06
KEGG_PATHWAY	Bacterial invasion of epithelial cells	10	5.55556	1.82449e-05	CDC42, ITGB1, PIK3CA, SRC, CAV1, ILK, RAC1, PIK3CB, PIK3R1, PTK2	171	77	8644	6.5649	0.00495036	4.13551e-05	1.82449e-05
KEGG_PATHWAY	Adherens junction	10	5.55556	8.31275e-05	CDC42, ROCK1, SRC, INSR, ERBB2, MAPK1, FYN, RAC1, EGFR, MAPK3	171	93	8644	5.43545	0.0223579	0.000175277	8.31275e-05
KEGG_PATHWAY	Parathyroid hormone synthesis, secretion and action	10	5.55556	0.000228186	MAP2K1, MMP13, MMP16, BCL2, PDE4B, MAPK1, PRKCA, FOS, EGFR, MAPK3	171	106	8644	4.76884	0.0601864	0.000463184	0.000228186
KEGG_PATHWAY	Serotonergic synapse	10	5.55556	0.000420235	APP, MAP2K1, MAOA, ALOX5, CASP3, MAPK1, PRKCA, PTGS2, MAPK3, PTGS1	171	115	8644	4.39563	0.108035	0.000816456	0.000420235
KEGG_PATHWAY	AMPK signaling pathway	10	5.55556	0.00061058	PIK3CA, SCD, FASN, INSR, AKT1, HMGCR, PIK3CB, PIK3R1, SIRT1, INS	171	121	8644	4.17766	0.153063	0.00117786	0.00061058
KEGG_PATHWAY	GnRH secretion	9	5	3.28943e-05	MAP2K1, PIK3CA, SPP1, MAPK1, AKT1, PRKCA, PIK3CB, PIK3R1, MAPK3	171	64	8644	7.10855	0.0089075	7.101e-05	3.28943e-05
KEGG_PATHWAY	Longevity regulating pathway	9	5	0.000346056	PIK3CA, INSR, AKT1, PIK3CB, PIK3R1, SIRT1, TP53, RELA, INS	171	89	8644	5.11177	0.089848	0.000687061	0.000346056
KEGG_PATHWAY	Hematopoietic cell lineage	9	5	0.000710466	IL4, IL1A, IL6, MME, IL1B, ANPEP, IL2RA, CD38, TNF	171	99	8644	4.59543	0.175778	0.00136089	0.000710466
KEGG_PATHWAY	Mitophagy - animal	9	5	0.000923329	MAPK10, JUN, MAPK8, TBK1, SRC, HIF1A, TP53, RELA, BCL2L1	171	103	8644	4.41696	0.222181	0.00175626	0.000923329
KEGG_PATHWAY	Signaling pathways regulating pluripotency of stem cells	9	5	0.0071259	MAP2K1, PIK3CA, STAT3, MAPK1, AKT1, PIK3CB, PIK3R1, MAPK14, MAPK3	171	143	8644	3.18145	0.857039	0.0128361	0.0071259
KEGG_PATHWAY	Tight junction	9	5	0.0188304	MAPK10, CDC42, ITGB1, JUN, MAPK8, ROCK1, SRC, ERBB2, RAC1	171	170	8644	2.67616	0.994319	0.0326234	0.0188304
KEGG_PATHWAY	Antifolate resistance	8	4.44444	1.39822e-06	DHFR, IKBKB, IL6, CHUK, IL1B, TYMS, TNF, RELA	171	30	8644	13.4799	0.000380243	3.72857e-06	1.61754e-06
KEGG_PATHWAY	Aldosterone-regulated sodium reabsorption	8	4.44444	6.29648e-06	PIK3CA, INSR, MAPK1, PRKCA, PIK3CB, PIK3R1, MAPK3, INS	171	37	8644	10.9297	0.00171118	1.52914e-05	6.63379e-06
KEGG_PATHWAY	Allograft rejection	8	4.44444	7.59149e-06	IL10, IL4, CD40LG, IFNG, PRF1, GZMB, TNF, IL2	171	38	8644	10.642	0.00206276	1.8113e-05	7.85785e-06
KEGG_PATHWAY	Graft-versus-host disease	8	4.44444	1.51886e-05	IL1A, IL6, IFNG, IL1B, PRF1, GZMB, TNF, IL2	171	42	8644	9.62852	0.0041228	3.50109e-05	1.51886e-05
KEGG_PATHWAY	Type I diabetes mellitus	8	4.44444	1.78442e-05	IL1A, IFNG, IL1B, PRF1, GZMB, TNF, IL2, INS	171	43	8644	9.4046	0.00484191	4.07868e-05	1.78442e-05
KEGG_PATHWAY	Regulation of lipolysis in adipocytes	8	4.44444	0.000129958	PIK3CA, INSR, AKT1, PIK3CB, PIK3R1, PTGS2, INS, PTGS1	171	58	8644	6.97237	0.0347334	0.000269837	0.000129958
KEGG_PATHWAY	Longevity regulating pathway - multiple species	8	4.44444	0.000179467	PIK3CA, INSR, AKT1, PIK3CB, PIK3R1, SIRT1, SOD1, INS	171	61	8644	6.62947	0.0476468	0.000367029	0.000179467
KEGG_PATHWAY	Viral myocarditis	8	4.44444	0.00032408	CD40LG, CASP3, CAV1, PRF1, FYN, RAC1, ITGAL, ICAM1	171	67	8644	6.03579	0.0843894	0.00064816	0.00032408
KEGG_PATHWAY	Complement and coagulation cascades	8	4.44444	0.00146564	CFD, THBD, PLAU, C5AR1, SERPINE1, PLAT, F2, F3	171	86	8644	4.7023	0.328973	0.00271193	0.00146564
KEGG_PATHWAY	Dopaminergic synapse	8	4.44444	0.0151988	MAPK10, MAPK8, MAOA, AKT1, PRKCA, FOS, MAPK14, PPP1CA	171	132	8644	3.06362	0.984483	0.0265004	0.0151988
KEGG_PATHWAY	Adrenergic signaling in cardiomyocytes	8	4.44444	0.0321082	BCL2, MAPK1, AKT1, PRKCA, MAPK14, PIK3CG, PPP1CA, MAPK3	171	154	8644	2.62596	0.99986	0.0549272	0.0321082
KEGG_PATHWAY	Arachidonic acid metabolism	7	3.88889	0.00120181	HPGD, ALOX5, EPHX2, PLA2G2A, PTGS2, PTGES, PTGS1	171	61	8644	5.80079	0.278981	0.00225444	0.00120181
KEGG_PATHWAY	Gap junction	7	3.88889	0.007598	MAP2K1, SRC, EGF, MAPK1, PRKCA, EGFR, MAPK3	171	88	8644	4.021	0.874387	0.0135964	0.007598
KEGG_PATHWAY	Intestinal immune network for IgA production	6	3.33333	0.00262852	IL10, IL4, IL6, TGFB1, CD40LG, IL2	171	49	8644	6.18976	0.511248	0.0048308	0.00262852
KEGG_PATHWAY	Autoimmune thyroid disease	6	3.33333	0.0037142	IL10, IL4, CD40LG, PRF1, GZMB, IL2	171	53	8644	5.72261	0.636561	0.00673508	0.0037142
KEGG_PATHWAY	Amphetamine addiction	6	3.33333	0.0113195	JUN, MAOA, PRKCA, FOS, SIRT1, PPP1CA	171	69	8644	4.39563	0.954791	0.0201236	0.0113195
KEGG_PATHWAY	p53 signaling pathway	6	3.33333	0.0150079	CASP3, SERPINE1, MDM2, BCL2, TP53, BCL2L1	171	74	8644	4.09862	0.983643	0.0263365	0.0150079
KEGG_PATHWAY	Staphylococcus aureus infection	6	3.33333	0.0405075	IL10, CFD, C5AR1, FPR2, ITGAL, ICAM1	171	96	8644	3.15936	0.999987	0.0684351	0.0405075
KEGG_PATHWAY	Renin-angiotensin system	5	2.77778	0.000954633	ACE2, ACE, MME, ANPEP, CTSG	171	23	8644	10.9891	0.228782	0.0018032	0.000954633
KEGG_PATHWAY	Apoptosis - multiple species	5	2.77778	0.00337863	MAPK10, MAPK8, CASP3, BCL2, BCL2L1	171	32	8644	7.89839	0.601698	0.0061677	0.00337863
KEGG_PATHWAY	Carbohydrate digestion and absorption	5	2.77778	0.0133491	MGAM, PIK3CA, AKT1, PIK3CB, PIK3R1	171	47	8644	5.37763	0.974149	0.0235777	0.0133491
KEGG_PATHWAY	Long-term potentiation	5	2.77778	0.0425132	MAP2K1, MAPK1, PRKCA, PPP1CA, MAPK3	171	67	8644	3.77237	0.999993	0.0713802	0.0425132
KEGG_PATHWAY	Renin secretion	5	2.77778	0.0465459	EDNRA, ACE, PTGER2, KCNMA1, CTSB	171	69	8644	3.66302	0.999998	0.0776716	0.0465459
KEGG_PATHWAY	Asthma	4	2.22222	0.0224415	IL10, IL4, CD40LG, TNF	171	31	8644	6.52254	0.997916	0.0386334	0.0224415
KEGG_PATHWAY	Thyroid cancer	4	2.22222	0.0356284	MAP2K1, MAPK1, TP53, MAPK3	171	37	8644	5.46483	0.999948	0.0605684	0.0356284
